# Supplementary material for: A Set of 17 microRNAs Common for Brain and Cerebrospinal Fluid Differentiates Primary Central Nervous System Lymphoma from Non-Malignant Brain Tumors
Source: MDPI journal article supplement (doi:10.3390/biom11091395), 2021-09-21
Supplement: s1 [file s1]

## Supplementary Table S7

Drugs potentially affecting CNS DLBCL-specific CSF/tumor miRNAs.

| <b>Drugs (SM2miR)</b>                                            |                                              |                                                              |                 |                                |                                                                                               |
|------------------------------------------------------------------|----------------------------------------------|--------------------------------------------------------------|-----------------|--------------------------------|-----------------------------------------------------------------------------------------------|
| <b>Drugs potentially affecting CNS DLBCL-specific CSF miRNAs</b> |                                              |                                                              |                 |                                |                                                                                               |
| <b>No</b>                                                        | <b>subcategory</b>                           | <b>type of substance</b>                                     | <b>q-value*</b> | <b>number of miRs observed</b> | <b>hsa-miRs</b>                                                                               |
| 1                                                                | Curcumin                                     | extract from rhizomes of the plant <i>Curcuma longa</i>      | 2.31637E-08     | 12                             | 19a-3p; 16-5p; 148a-3p; 15a-5p; 21-5p; 15b-5p; 210-3p; 92a-3p; 106b-3p; 25-3p; 20a-5p; 26a-5p |
| 2                                                                | Formaldehyde                                 | organic compound potential. occupational carcinogen          | 5.94307E-05     | 11                             | 19a-3p; 16-5p; 15a-5p; 19b-3p; 21-5p; 15b-5p; 17-3p; 25-3p; 9-5p; 20a-5p; 26a-5p              |
| 3                                                                | Hydroxamic acid HDACi LAQ824                 | HDACi                                                        | 5.94307E-05     | 7                              | 19a-3p; 148a-3p; 19b-3p; 21-5p; 92a-3p; 20a-5p; 26a-5p                                        |
| 4                                                                | Benzoapyrene                                 | carcinogen                                                   | 0.000579369     | 4                              | 16-5p; 15a-5p; 92a-3p; 25-3p                                                                  |
| 5                                                                | Morphine                                     | opiate pain medication                                       | 0.0012018       | 6                              | 16-5p; 221-3p; 423-5p; 21-5p; 15b-5p; 26a-5p                                                  |
| 6                                                                | 5-aza-2-deoxycytidine 5-Aza-CdR (Decitabine) | epigenetic drug. demethylating agent. analog of cytidine     | 0.0015511       | 7                              | 19a-3p; 16-5p; 15a-5p; 21-5p; 210-3p; 25-3p; 20a-5p                                           |
| 7                                                                | Bisphenol A                                  | organic synthetic compound. xenoestrogen                     | 0.0016742       | 5                              | 16-5p; 19b-3p; 21-5p; 15b-5p; 20a-5p                                                          |
| 8                                                                | Diethylstilbestrol                           | nonsteroidal estrogen                                        | 0.0036876       | 8                              | 16-5p; 15a-5p; 9-3p; 15b-5p; 25-3p; 9-5p; 20a-5p; 26a-5p                                      |
| 9                                                                | Marine fungal metabolite 1386A               | bioactive compound from the mangrove fungus 1386A            | 0.0042302       | 6                              | 16-5p; 21-5p; 15b-5p; 25-3p; 20a-5p; 26a-5p                                                   |
| 10                                                               | 3,3-diindolylmethane BR-DIM                  | bioactive compounds from cruciferes                          | 0.0049726       | 2                              | 21-5p; 92a-3p                                                                                 |
| 11                                                               | Ginsenoside Rh2                              | bioactive compound from Panax ginseng                        | 0.0049726       | 8                              | 16-5p; 148a-3p; 221-3p; 21-5p; 15b-5p; 210-3p; 92a-3p; 25-3p                                  |
| 12                                                               | Histone deacetylase inhibitor ITF2357        | HDACi                                                        | 0.0049726       | 2                              | 19a-3p; 19b-3p                                                                                |
| 13                                                               | Melphalan                                    | chemotherapy drug (alkylating agent)                         | 0.0049726       | 2                              | 16-5p; 15a-5p                                                                                 |
| 14                                                               | 5-azacytidine 5-AzaC (Azacitidine)           | epigenetic drug. demethylating agent. analog of cytidine     | 0.005687        | 3                              | 19a-3p; 19b-3p; 20a-5p                                                                        |
| 15                                                               | Temozolomide                                 | epigenetic drug. demethylating agent. analog of cytidine     | 0.005687        | 4                              | 21-5p; 210-3p; 9-5p; 26a-5p                                                                   |
| 16                                                               | 2,3,7,8-tetrachlorodibenzo-p-dioxin TCDD     | dioxin                                                       | 0.0095402       | 2                              | 92a-3p; 25-3p                                                                                 |
| 17                                                               | All-trans-retinoic acid ATRA                 | chemotherapy drug-naturally-occurring acid of retinol        | 0.0095402       | 4                              | 16-5p; 15a-5p; 21-5p; 15b-5p                                                                  |
| 18                                                               | Arsenic trioxide                             | chemotherapy drug (natural product)                          | 0.0095402       | 7                              | 19a-3p; 16-5p; 148a-3p; 221-3p; 21-5p; 210-3p; 9-5p                                           |
| 19                                                               | Bortezomib                                   | antineoplastic agents-proteosome inhibitor                   | 0.0095402       | 2                              | 16-5p; 15a-5p                                                                                 |
| 20                                                               | Nicotine                                     | stimulant drug -agonist at nicotinic acetylcholine receptors | 0.0095402       | 2                              | 16-5p; 21-5p                                                                                  |
| 21                                                               | Goserelin                                    | gonadotropin-releasing hormone (GnRH) agonists               | 0.0127184       | 4                              | 148a-3p; 9-3p; 210-3p; 9-5p                                                                   |
| 22                                                               | Activin A                                    | dimeric glycoprotein -TGF- $\beta$ family                    | 0.0133869       | 3                              | 19a-3p; 19b-3p; 221-3p                                                                        |
| 23                                                               | Sulindac sulfide                             | nonsteroidal anti-inflammatory drug (NSAID)                  | 0.0156444       | 2                              | 21-5p; 9-5p                                                                                   |

|    |                                                     |                                                                                |           |    |                                                                                   |
|----|-----------------------------------------------------|--------------------------------------------------------------------------------|-----------|----|-----------------------------------------------------------------------------------|
| 24 | Sunitinib                                           | chemotherapy drug-vascular endothelial growth factor (VEGF) receptor inhibitor | 0.0156444 | 2  | 221-3p; 21-5p                                                                     |
| 25 | Vitamin D3                                          | Vitamin D3                                                                     | 0.0192094 | 4  | 19a-3p; 221-3p; 15b-5p; 26a-5p                                                    |
| 26 | Trichostatin A TSA                                  | hydroxamic acids HDACi                                                         | 0.0245804 | 6  | 19a-3p; 16-5p; 221-3p; 21-5p; 25-3p; 20a-5p                                       |
| 27 | 5-aza-2-deoxycytidine 5-Aza-CdR + trichostatin ATSA | Decitabine +Trichostatin A                                                     | 0.0291463 | 4  | 19a-3p; 16-5p; 25-3p; 20a-5p                                                      |
| 28 | 5-Fluorouracil                                      | chemotherapy drug - antimetabolites                                            | 0.0293139 | 11 | 19a-3p; 16-5p; 15a-5p; 423-5p; 21-5p; 9-3p; 15b-5p; 210-3p; 92a-3p; 25-3p; 20a-5p |
| 29 | O.p-dichlorodiphenyltrichloroethane DDT             | insecticide                                                                    | 0.0293139 | 2  | 21-5p; 15b-5p                                                                     |
| 30 | Glucocorticoid                                      | corticosteroids                                                                | 0.0414114 | 4  | 16-5p; 19b-3p; 21-5p; 15b-5p                                                      |

### Drugs potentially affecting CNS DLBCL-specific tumor miRNAs

| No | subcategory                                  | type of substance                                                                       | q-value     | number of miRs observed | hsa-miRs                                                                                                                                                                                                                                                                                                                                                 |
|----|----------------------------------------------|-----------------------------------------------------------------------------------------|-------------|-------------------------|----------------------------------------------------------------------------------------------------------------------------------------------------------------------------------------------------------------------------------------------------------------------------------------------------------------------------------------------------------|
| 1  | Arsenic trioxide                             | chemotherapy drug (natural product)                                                     | 5.10584E-07 | 40                      | 17-5p; 155-5p; 96-5p; 18a-5p; 19a-3p; 183-5p; 200c-3p; 146a-5p; 181c-5p; 210-3p; 9-5p; 16-5p; 124-3p; 30a-5p; 191-5p; 491-5p; 125a-5p; 203a-3p; 128-3p; 143-3p; hsa-let-7a-5p; 218-5p; 148a-3p; 30c-5p; 144-3p; 132-3p; 98-5p; 149-5p; 1-3p; 181d-5p; 378a-3p; 7-5p; 27b-3p; 27a-3p; 32-5p; 21-5p; 20b-5p; 23b-3p; 125b-5p; 126-3p                       |
| 2  | Hydroxamic acid HDACi LAQ824                 | HDACi                                                                                   | 3.28965E-06 | 20                      | 92a-3p; 20a-5p; 19a-3p; hsa-let-7c-5p; 183-5p; hsa-let-7e-5p; 200c-3p; 19b-3p; 106b-5p; 191-5p; hsa-let-7a-5p; 148a-3p; 30c-5p; 98-5p; 26a-5p; 27b-3p; 27a-3p; 21-5p; 23b-3p; 125b-5p                                                                                                                                                                    |
| 3  | Aidi injection                               | extracts from Radix Ginseng. Astragaloside. Eleutherococcus senticosus. and Cantharidin | 5.71033E-05 | 11                      | 155-5p; 18a-5p; 210-3p; 191-5p; 195-5p; hsa-let-7a-5p; 181d-5p; 7-5p; 27a-3p; 125b-5p; 126-3p                                                                                                                                                                                                                                                            |
| 4  | Formaldehyde                                 | organic compound potential. occupational carcinogen                                     | 5.71033E-05 | 40                      | 17-5p; 182-5p; 20a-5p; 18a-5p; 19a-3p; hsa-let-7c-5p; 17-3p; hsa-let-7e-5p; 93-5p; 19b-3p; 582-5p; 106b-5p; 15b-5p; 130b-3p; 25-3p; 9-5p; 425-5p; 16-5p; 192-5p; 186-5p; hsa-let-7a-5p; 487b-3p; 99a-5p; 130a-3p; 98-5p; 15a-5p; 194-5p; 26a-5p; 106a-5p; 181d-5p; 378a-3p; 590-5p; 27b-3p; 27a-3p; hsa-let-7b-5p; 21-5p; 20b-5p; 454-3p; 23b-3p; 126-3p |
| 5  | 5-aza-2-deoxycytidine 5-Aza-CdR (Decitabine) | epigenetic drug. demethylating agent. analog of cytidine                                | 7.89999E-05 | 26                      | 17-5p; 182-5p; 20a-5p; 155-5p; 19a-3p; 93-5p; 106b-5p; 25-3p; 210-3p; 16-5p; 31-5p; 191-5p; 30b-5p; 130a-3p; 15a-5p; 181d-5p; 378a-3p; 27b-3p; 27a-3p; 494-3p; 21-5p; 20b-5p; 23b-3p; 145-5p; 125b-5p; 126-3p                                                                                                                                            |

|    |                                                     |                                                          |             |    |                                                                                                                                                                                                                                                                                                                                                    |
|----|-----------------------------------------------------|----------------------------------------------------------|-------------|----|----------------------------------------------------------------------------------------------------------------------------------------------------------------------------------------------------------------------------------------------------------------------------------------------------------------------------------------------------|
| 6  | 5-azacytidine 5-AzaC (Azacitidine)                  | epigenetic drug. demethylating agent. analog of cytidine | 0.000274924 | 8  | 17-5p; 20a-5p; 18a-5p; 19a-3p; 19b-3p; 203a-3p; 145-5p; 125b-5p                                                                                                                                                                                                                                                                                    |
| 7  | Bicalutamide                                        | nonsteroidal antiandrogen                                | 0.000274924 | 21 | 17-5p; hsa-let-7e-5p; 210-3p; 9-5p; 30d-5p; 381-3p; 376a-3p; 376c-3p; 9-3p; 218-5p; 30b-5p; 99a-5p; 144-3p; 149-5p; 551b-3p; 106a-5p; 1-3p; 204-5p; 32-5p; 23b-3p; 125b-5p                                                                                                                                                                         |
| 8  | Ginsenoside Rh2                                     | bioactive compound from Panax ginseng                    | 0.000274924 | 37 | 92a-3p; 155-5p; 18a-5p; hsa-let-7c-5p; 1290; hsa-let-7e-5p; 181c-5p; 106b-5p; 15b-5p; 130b-3p; 25-3p; 210-3p; 486-5p; 16-5p; 30a-5p; 186-5p; 31-5p; 128-3p; 218-5p; 135a-5p; 148a-3p; 21-3p; 31-3p; 98-5p; 361-3p; 129-2-3p; 296-5p; 323a-3p; 18b-5p; 590-5p; 138-5p; 27b-3p; 32-5p; 21-5p; 23b-3p; 370-3p; 125b-5p                                |
| 9  | Vorinostat SAHA                                     | HDACi                                                    | 0.000274924 | 28 | 92a-3p; 182-5p; 155-5p; 96-5p; 17-3p; 183-5p; 425-5p; 381-3p; 376a-3p; 124-3p; 9-3p; 769-5p; 379-5p; 487b-3p; 654-3p; 132-3p; 134-5p; 129-2-3p; 106a-5p; 629-5p; 432-5p; 127-3p; 409-3p; 382-5p; 383-5p; 502-3p; 99b-5p; 126-3p                                                                                                                    |
| 10 | 1.2.6-Tri-O-galloyl-beta-D-glucopyranose            | gallotonina from cell cultures of Cornus officinalis.    | 0.000459038 | 42 | 92a-3p; 17-5p; 182-5p; 18a-5p; 19a-3p; hsa-let-7c-5p; 19b-3p; 25-3p; 9-5p; 154-5p; 30d-5p; 381-3p; 376a-3p; 30a-5p; 186-5p; 451a; 191-5p; 195-5p; 379-5p; 485-5p; 143-3p; hsa-let-7a-5p; 218-5p; 30b-5p; 144-3p; 132-3p; 484; 134-5p; 98-5p; 149-5p; 409-5p; 194-5p; 26a-5p; 296-5p; 423-3p; 18b-5p; 432-5p; 7-5p; 27b-3p; 27a-3p; 125b-5p; 99b-5p |
| 11 | Marine fungal metabolite 1386A                      | bioactive compound from the mangrove fungus 1386A        | 0.000465703 | 22 | 182-5p; 20a-5p; 1246; hsa-let-7c-5p; hsa-let-7e-5p; 93-5p; 200c-3p; 15b-5p; 25-3p; 16-5p; 125a-5p; 203a-3p; hsa-let-7a-5p; 26a-5p; 320c; 7-5p; 320d; 27b-3p; hsa-let-7b-5p; 21-5p; 125b-5p; 99b-5p                                                                                                                                                 |
| 12 | Curcumin                                            | extract from rhizomes of the plant <i>Curcuma longa</i>  | 0.00061173  | 26 | 92a-3p; 106b-3p; 20a-5p; 19a-3p; 92a-1-5p; 93-5p; 200c-3p; 15b-5p; 25-3p; 210-3p; 16-5p; 125a-5p; 195-5p; 203a-3p; hsa-let-7a-5p; 148a-3p; 98-5p; 15a-5p; 26a-5p; 181d-5p; 7-5p; 124-5p; 204-5p; 27a-3p; 21-5p; 23b-3p                                                                                                                             |
| 13 | 5-aza-2-deoxycytidine 5-Aza-CdR + trichostatin ATSA | Decitabine +Trichostatin A                               | 0.000985262 | 18 | 182-5p; 20a-5p; 19a-3p; 93-5p; 25-3p; 16-5p; 31-5p; 191-5p; 30b-5p; 409-5p; 129-2-3p; 181d-5p; 378a-3p; 127-3p; 27a-3p; 494-3p; 20b-5p; 23b-3p                                                                                                                                                                                                     |

|    |                     |                                                                                                                                                              |           |    |                                                                                                                                                                                                                                                           |
|----|---------------------|--------------------------------------------------------------------------------------------------------------------------------------------------------------|-----------|----|-----------------------------------------------------------------------------------------------------------------------------------------------------------------------------------------------------------------------------------------------------------|
| 14 | Trichostatin A TSA  | hydroxamic acids HDACi                                                                                                                                       | 0.0022961 | 30 | 182-5p; 20a-5p; 155-5p; 19a-3p; hsa-let-7c-5p; 93-5p; 200c-3p; 146a-5p; 106b-5p; 25-3p; 486-5p; 16-5p; 31-5p; 191-5p; 143-3p; hsa-let-7a-5p; 129-5p; 30b-5p; 144-3p; 194-5p; 139-5p; 1-3p; 181d-5p; 27a-3p; 494-3p; 21-5p; 20b-5p; 153-3p; 23b-3p; 126-3p |
| 15 | Gemcitabine         | chemotherapy drug (antimetabolite)                                                                                                                           | 0.0023399 | 24 | 155-5p; hsa-let-7c-5p; 16-5p; 154-5p; 186-5p; 128-3p; hsa-let-7a-5p; 329-3p; 132-3p; 149-5p; 409-5p; 194-5p; 129-2-3p; 26a-5p; 139-5p; 323a-3p; 1-3p; 187-3p; 339-5p; 204-5p; 27a-3p; hsa-let-7b-5p; 21-5p; 211-5p                                        |
| 16 | 17beta-estradiol E2 | estrogen steroid hormone                                                                                                                                     | 0.0032036 | 24 | 17-5p; hsa-let-7c-5p; hsa-let-7e-5p; 200c-3p; 146a-5p; 15b-5p; 9-5p; 124-3p; 203a-3p; 128-3p; 143-3p; hsa-let-7a-5p; 30c-5p; 30b-5p; 98-5p; 409-5p; 1-3p; 27b-3p; 27a-3p; hsa-let-7b-5p; 21-5p; 23b-3p; 211-5p; 126-3p                                    |
| 17 | Morphine            | opiate pain medication                                                                                                                                       | 0.0044981 | 16 | 155-5p; 146a-5p; 15b-5p; 16-5p; 191-5p; 128-3p; 423-5p; 30c-5p; 132-3p; 26a-5p; 320c; 382-5p; 21-5p; 23b-3p; 125b-5p; 99b-5p                                                                                                                              |
| 18 | Dexamethasone       | corticosteroids                                                                                                                                              | 0.0073903 | 5  | 451a; 148a-3p; 323a-3p; 27b-3p; 27a-3p                                                                                                                                                                                                                    |
| 19 | Glucocorticoid      | corticosteroids                                                                                                                                              | 0.0073903 | 18 | 155-5p; 142-3p; 93-5p; 19b-3p; 146a-5p; 15b-5p; 16-5p; 125a-5p; 195-5p; 203a-3p; 99a-5p; 27a-3p; 502-3p; 139-3p; 21-5p; 145-5p; 99b-5p; 126-3p                                                                                                            |
| 20 | Paclitaxel          | chemotherapy drugs. Plant alkaloids from the periwinkle plant (catharanthus rosea)(vinca alkaloids), the bark of the Pacific Yew tree (taxus) (the taxanes). | 0.0073903 | 8  | 30a-5p; 451a; 148a-3p; 323a-3p; 27b-3p; 27a-3p; 99b-5p; 126-3p                                                                                                                                                                                            |
| 21 | Trastuzumab         | antineoplastics, anti-HER2; monoclonal antibody                                                                                                              | 0.0074885 | 14 | 18a-5p; 1246; 210-3p; 425-5p; 30d-5p; 125a-5p; 195-5p; 30c-5p; 30b-5p; 98-5p; 26a-5p; 296-5p; 494-3p; 21-5p                                                                                                                                               |
| 22 | Bisphenol A         | organic synthetic compound. xenoestrogen                                                                                                                     | 0.0082327 | 12 | 20a-5p; 155-5p; hsa-let-7c-5p; 19b-3p; 146a-5p; 106b-5p; 15b-5p; 16-5p; 376c-3p; 106a-5p; 27b-3p; 21-5p                                                                                                                                                   |
| 23 | Diethylstilbestrol  | nonsteroidal estrogen                                                                                                                                        | 0.0082327 | 30 | 17-5p; 20a-5p; 92a-1-5p; 93-5p; 497-5p; 106b-5p; 15b-5p; 130b-3p; 25-3p; 9-5p; 16-5p; 9-3p; 195-5p; 203a-3p; 218-5p; 135a-5p; 625-5p; 409-5p; 758-3p; 15a-5p; 194-5p; 26a-5p; 106a-5p; 181d-5p; 138-5p; 20b-5p; 454-3p; 370-3p; 126-3p; 92b-3p            |
| 24 | Goserelin           | gonadotropin-releasing hormone (GnRH) agonists                                                                                                               | 0.0093793 | 13 | 130b-3p; 210-3p; 9-5p; 9-3p; 203a-3p; 128-3p; 135a-5p; 148a-3p; 99a-5p; 134-5p; 149-5p; 7-5p; 125b-5p                                                                                                                                                     |

|    |                                                            |                                                                                                            |           |    |                                                                                                                                                  |
|----|------------------------------------------------------------|------------------------------------------------------------------------------------------------------------|-----------|----|--------------------------------------------------------------------------------------------------------------------------------------------------|
| 25 | Enoxacin                                                   | quinolone/fluoroquinolone antibiotic                                                                       | 0.0123216 | 17 | 96-5p; 146a-5p; 16-5p; 124-3p; 30a-5p; 31-5p; 128-3p; 143-3p; hsa-let-7a-5p; 99a-5p; 26a-5p; 139-5p; 7-5p; hsa-let-7b-5p; 21-5p; 125b-5p; 126-3p |
| 26 | 5-aza-2-deoxycytidine 5-Aza-CdR + 4-phenylbutyric acid PBA | Decitabine +Phenylbutyric acid                                                                             | 0.0142215 | 10 | 182-5p; 183-5p; 192-5p; 376c-3p; 132-3p; 134-5p; 495-3p; 127-3p; 494-3p; 126-3p                                                                  |
| 27 | Benzoapyrene                                               | carcinogen                                                                                                 | 0.0193092 | 6  | 92a-3p; 146a-5p; 25-3p; 16-5p; 15a-5p; 125b-5p                                                                                                   |
| 28 | Metformin                                                  | antihyperglycemic agent of the biguanide class                                                             | 0.0193092 | 6  | hsa-let-7c-5p; 200c-3p; 192-5p; hsa-let-7a-5p; 26a-5p; hsa-let-7b-5p                                                                             |
| 29 | Temozolomide                                               | chemotherapy drug (alkylating agent)                                                                       | 0.0193092 | 10 | 155-5p; 210-3p; 9-5p; 195-5p; 135a-5p; 26a-5p; 21-5p; 153-3p; 145-5p; 125b-5p                                                                    |
| 30 | Vinblastine                                                | chemotherapy drugs- vinca alkaloids                                                                        | 0.0193092 | 5  | 451a; 148a-3p; 323a-3p; 27b-3p; 27a-3p                                                                                                           |
| 31 | XMD8-92                                                    | potent and selective inhibitor of BMK1/ERK5/MAPK7 and DCAMKL1 (DCLK1), kinases implicated in tumorigenesis | 0.0193092 | 4  | 143-3p; hsa-let-7a-5p; 144-3p; 145-5p                                                                                                            |
| 32 | Oxaliplatin L-OHP                                          | chemotherapy drug (alkylating agent)                                                                       | 0.0267627 | 9  | 92a-3p; 93-5p; 25-3p; 30d-5p; 191-5p; 128-3p; 320d; hsa-let-7b-5p; 92b-3p                                                                        |
| 33 | Vitamin D3                                                 | Vitamin D3                                                                                                 | 0.0359766 | 13 | 19a-3p; 146a-5p; 766-3p; 106b-5p; 15b-5p; 191-5p; 203a-3p; hsa-let-7a-5p; 543; 26a-5p; 532-3p; 339-5p; 99b-5p                                    |
| 34 | Calcitriol                                                 | active form of vitamin D                                                                                   | 0.0486089 | 5  | 181c-5p; 15a-5p; 411-5p; 20b-5p; 126-3p                                                                                                          |
| 35 | 5-methoxy-N,N-dimethyltryptamine 5-MeO-DMT                 | naturally-occurring psychoactive indolealkylamine drugs                                                    | 0.0487295 | 3  | 18a-5p; 124-3p; 27b-3p                                                                                                                           |
| 36 | Camptothecin                                               | chemotherapy drugs- alkaloid from the stem wood of the Chinese tree ( <i>Camptotheca acuminata</i> )       | 0.0487295 | 3  | 17-5p; 155-5p; 125b-5p                                                                                                                           |
| 37 | Cisplatin                                                  | chemotherapy drug (alkylating agent)                                                                       | 0.0487295 | 18 | 182-5p; 142-5p; 425-5p; 16-5p; 192-5p; 30d-5p; 381-3p; 487b-3p; 98-5p; 106a-5p; 27b-3p; 204-5p; 411-3p; 21-5p; 340-5p; 454-3p; 23b-3p; 125b-5p   |
| 38 | Gefitinib                                                  | chemotherapy drug-epidermal growth factor receptor (EGFR) tyrosine kinase inhibitor                        | 0.0487295 | 3  | 655-3p; 487b-3p; 134-5p                                                                                                                          |
| 39 | Hydroxychloroquine                                         | antimalarials drug                                                                                         | 0.0487295 | 3  | 155-5p; hsa-let-7a-5p; 21-5p                                                                                                                     |
| 40 | Nicotine                                                   | stimulant drug -agonist at nicotinic acetylcholine receptors                                               | 0.0487295 | 3  | 146a-5p; 16-5p; 21-5p                                                                                                                            |
| 41 | Prednisone                                                 | corticosteroids                                                                                            | 0.0487295 | 3  | 146a-5p; hsa-let-7a-5p; 21-5p                                                                                                                    |
| 42 | Vincristine                                                | chemotherapy drug (alkylating agent)                                                                       | 0.0487295 | 3  | 93-5p; 210-3p; 494-3p                                                                                                                            |

\*p-value after the Benjamini-Hochberg adjustment
