# Supplementary material for: A Set of 17 microRNAs Common for Brain and Cerebrospinal Fluid Differentiates Primary Central Nervous System Lymphoma from Non-Malignant Brain Tumors
Source: MDPI journal article supplement (doi:10.3390/biom11091395), 2021-09-21
Supplement: s1 [file s1]

## Supplementary Table S15

## Molecular functions of CNS DLBCL-specific tumor microRNAs.

| <i>GO Annotations indirect</i> |                                                 |             |                         |                                                                                                                                                                                                                                                                                                                                                                                                                                                                                                                                                                                                                                                                                                                                                                                                                                                                                                                                                                                                                                                                                                                                                            |
|--------------------------------|-------------------------------------------------|-------------|-------------------------|------------------------------------------------------------------------------------------------------------------------------------------------------------------------------------------------------------------------------------------------------------------------------------------------------------------------------------------------------------------------------------------------------------------------------------------------------------------------------------------------------------------------------------------------------------------------------------------------------------------------------------------------------------------------------------------------------------------------------------------------------------------------------------------------------------------------------------------------------------------------------------------------------------------------------------------------------------------------------------------------------------------------------------------------------------------------------------------------------------------------------------------------------------|
| No                             | subcategory                                     | q-value*    | number of miRs observed | hsa-miRs                                                                                                                                                                                                                                                                                                                                                                                                                                                                                                                                                                                                                                                                                                                                                                                                                                                                                                                                                                                                                                                                                                                                                   |
| 1                              | negative regulation of anoikis                  | 2.19534E-23 | 91                      | 92a-3p; 17-5p; 182-5p; 20a-5p; 155-5p; 96-5p; 18a-5p; 19a-3p; hsa-let-7c-5p; 17-3p; 4521; 183-5p; hsa-let-7e-5p; 873-5p; 93-5p; 200c-3p; 582-5p; 497-5p; 146a-5p; 181c-5p; 106b-5p; 15b-5p; 130b-3p; 25-3p; 9-5p; 16-5p; 192-5p; 30d-5p; 376c-3p; 124-3p; 30a-5p; 410-3p; 186-5p; 9-3p; 31-5p; 451a; 769-5p; 191-5p; 125a-5p; 195-5p; 203a-3p; 379-5p; 128-3p; 485-5p; 143-3p; hsa-let-7a-5p; 218-5p; 135a-5p; 423-5p; 543; 148a-3p; 129-5p; 30c-5p; 30b-5p; 144-3p; 484; 134-5p; 935; 98-5p; 495-3p; 15a-5p; 194-5p; 26a-5p; 296-5p; 106a-5p; 139-5p; 423-3p; 320c; 1-3p; 335-3p; 33b-5p; 181d-5p; 7-5p; 320d; 138-5p; 27b-3p; 204-5p; 494-3p; 32-5p; 21-5p; 20b-5p; 136-5p; 30a-3p; 153-3p; 338-5p; 23b-3p; 211-5p; 125b-5p; 221-5p; 126-3p; 92b-3p                                                                                                                                                                                                                                                                                                                                                                                                      |
| 2                              | epithelial to mesenchymal transition            | 1.07061E-22 | 138                     | 92a-3p; 106b-3p; 17-5p; 182-5p; 20a-5p; 155-5p; 96-5p; 18a-5p; 1246; 19a-3p; 19b-1-5p; hsa-let-7c-5p; 17-3p; 142-5p; 183-5p; hsa-let-7e-5p; 142-3p; 1260a; 744-5p; 93-5p; 200c-3p; 19b-3p; 582-5p; 130b-5p; 497-5p; 146a-5p; 181c-5p; 106b-5p; 15b-5p; 130b-3p; 25-3p; 3615; 210-3p; 9-5p; 486-5p; 425-5p; 16-5p; 154-5p; 192-5p; 30d-5p; 376c-3p; 1285-3p; 124-3p; 30a-5p; 410-3p; 186-5p; 9-3p; 299-5p; 31-5p; 625-3p; 769-5p; 505-3p; 136-3p; 154-3p; 491-5p; 195-5p; 203a-3p; 369-5p; 379-5p; 128-3p; 485-5p; hsa-let-7a-5p; 218-5p; 423-5p; 543; 487b-3p; 148a-3p; 129-5p; 29b-1-5p; 129-1-3p; 378c; 30c-5p; 30b-5p; 144-3p; 101-5p; 93-3p; 329-3p; 484; 130a-3p; 3613-5p; 935; 98-5p; 149-5p; 382-3p; 625-5p; 378i; 409-5p; 495-3p; 15a-5p; 376a-5p; 194-5p; 433-3p; 129-2-3p; 26a-5p; 296-5p; 106a-5p; 139-5p; 320c; 1-3p; 335-3p; 33b-5p; 181d-5p; 18b-5p; 378a-3p; 590-5p; 432-5p; 7-5p; 320d; 138-5p; 532-3p; 187-3p; 409-3p; 885-5p; 27b-3p; 204-5p; 27a-3p; 494-3p; 369-3p; 32-5p; hsa-let-7b-5p; 21-5p; 590-3p; 20b-5p; 136-5p; 30a-3p; 340-5p; 378d; 153-3p; 99b-3p; 338-5p; 454-3p; 23b-3p; 211-5p; 145-5p; 370-3p; 504-5p; 125b-5p; 92b-3p |
| 3                              | pore complex                                    | 2.90052E-22 | 62                      | 92a-3p; 17-5p; 182-5p; 20a-5p; 155-5p; 96-5p; 18a-5p; 142-3p; 92a-1-5p; 744-5p; 93-5p; 200c-3p; 19b-3p; 497-5p; 766-3p; 181c-5p; 106b-5p; 15b-5p; 130b-3p; 25-3p; 9-5p; 16-5p; 192-5p; 376c-3p; 124-3p; 30a-5p; 655-3p; 451a; 125a-5p; 195-5p; 128-3p; 143-3p; hsa-let-7a-5p; 135a-5p; 423-5p; 148a-3p; 30b-5p; 484; 130a-3p; 98-5p; 15a-5p; 361-3p; 106a-5p; 139-5p; 320c; 1-3p; 33b-5p; 181d-5p; 7-5p; 204-5p; 494-3p; 32-5p; 21-5p; 20b-5p; 136-5p; 153-3p; 454-3p; 211-5p; 125b-5p; 221-5p; 126-3p; 92b-3p                                                                                                                                                                                                                                                                                                                                                                                                                                                                                                                                                                                                                                             |
| 4                              | positive regulation of cytokine secretion       | 1.5948E-21  | 56                      | 92a-3p; 106b-3p; 17-5p; 182-5p; 20a-5p; 96-5p; 19a-3p; hsa-let-7c-5p; 17-3p; 142-3p; 92a-1-5p; 744-5p; 93-5p; 146a-5p; 766-3p; 181c-5p; 106b-5p; 15b-5p; 25-3p; 486-5p; 16-5p; 192-5p; 30d-5p; 30a-5p; 451a; 769-5p; 191-5p; 195-5p; 203a-3p; 143-3p; 218-5p; 423-5p; 30c-5p; 30b-5p; 144-3p; 484; 130a-3p; 98-5p; 149-5p; 15a-5p; 361-3p; 194-5p; 106a-5p; 181d-5p; 432-5p; 187-3p; 409-3p; 769-3p; 32-5p; hsa-let-7b-5p; 21-5p; 20b-5p; 23b-3p; 125b-5p; 126-3p; 92b-3p                                                                                                                                                                                                                                                                                                                                                                                                                                                                                                                                                                                                                                                                                  |
| 5                              | negative regulation of fat cell differentiation | 3.84427E-20 | 114                     | 92a-3p; 106b-3p; 17-5p; 182-5p; 20a-5p; 155-5p; 96-5p; 18a-5p; 1246; 19a-3p; hsa-let-7c-5p; 17-3p; 1290; 142-5p; 183-5p; hsa-let-7e-5p; 142-3p; 744-5p; 873-5p; 93-5p; 200c-3p; 19b-3p; 582-5p; 130b-5p; 497-5p; 146a-5p; 766-3p; 181c-5p; 106b-5p; 15b-5p; 130b-3p; 25-3p; 210-3p; 9-5p; 486-5p; 16-5p; 154-5p; 192-5p; 381-3p; 376a-3p; 376c-3p; 124-3p; 30a-5p; 186-5p; 9-3p; 127-5p; 31-5p; 451a; 769-5p; 154-3p; 491-5p; 195-5p; 203a-3p; 128-3p; 143-3p; hsa-let-7a-5p; 218-5p; 135a-5p; 543; 485-3p; 487b-3p; 148a-3p; 21-3p; 129-5p; 29b-1-5p; 656-3p; 99a-5p; 144-3p; 93-3p; 329-3p; 132-3p; 484; 130a-3p; 3613-5p; 935; 98-5p; 149-5p; 758-3p; 15a-5p; 487a-3p; 26a-5p; 106a-5p; 139-5p; 323a-3p; 423-3p; 1-3p; 132-5p; 33b-5p; 181d-5p; 18b-5p; 590-5p; 7-5p; 138-5p; 187-3p; 885-5p; 27b-3p; 204-5p; 27a-3p; 494-3p; 32-5p; hsa-let-7b-5p; 21-5p; 20b-5p; 136-5p; 153-3p; 23b-3p; 211-5p; 145-5p; 370-3p; 504-5p; 125b-5p; 221-5p; 126-3p; 92b-3p                                                                                                                                                                                              |

|    |                                                                                 |             |    |                                                                                                                                                                                                                                                                                                                                                                                                                                                                                                                                                                                                                                                                                                                                              |
|----|---------------------------------------------------------------------------------|-------------|----|----------------------------------------------------------------------------------------------------------------------------------------------------------------------------------------------------------------------------------------------------------------------------------------------------------------------------------------------------------------------------------------------------------------------------------------------------------------------------------------------------------------------------------------------------------------------------------------------------------------------------------------------------------------------------------------------------------------------------------------------|
| 6  | cerebral cortex development                                                     | 1.13937E-19 | 88 | 4488; 92a-3p; 17-5p; 20a-5p; 155-5p; 18a-5p; 19a-3p; 183-5p; hsa-let-7e-5p; 1260b; 744-5p; 873-5p; 93-5p; 200c-3p; 19b-3p; 130b-5p; 181c-5p; 106b-5p; 15b-5p; 130b-3p; 25-3p; 9-5p; 425-5p; 16-5p; 192-5p; 376c-3p; 628-3p; 124-3p; 30a-5p; 410-3p; 186-5p; 127-5p; 769-5p; 491-5p; 125a-5p; 195-5p; 143-3p; 218-5p; 135a-5p; 423-5p; 148a-3p; 129-5p; 29b-1-5p; 30c-5p; 99a-5p; 380-3p; 329-3p; 132-3p; 130a-3p; 98-5p; 149-5p; 758-3p; 495-3p; 15a-5p; 194-5p; 433-3p; 26a-5p; 423-3p; 378a-3p; 432-5p; 7-5p; 532-3p; 339-5p; 382-5p; 885-5p; 27b-3p; 204-5p; 27a-3p; 769-3p; 369-3p; 411-3p; 502-3p; 32-5p; hsa-let-7b-5p; 21-5p; 20b-5p; 136-5p; 454-3p; 331-5p; 211-5p; 145-5p; 370-3p; 125b-5p; 92b-5p; 99b-5p; 126-3p; 92b-3p; 770-5p |
| 7  | negative regulation of stress-activated MAPK cascade                            | 1.73582E-19 | 63 | 92a-3p; 106b-3p; 17-5p; 182-5p; 20a-5p; 155-5p; 96-5p; 19a-3p; 19b-1-5p; hsa-let-7c-5p; 183-5p; hsa-let-7e-5p; 92a-1-5p; 744-5p; 16-2-3p; 93-5p; 200c-3p; 130b-5p; 106b-5p; 15b-5p; 25-3p; 9-5p; 486-5p; 16-5p; 30d-5p; 376a-3p; 186-5p; 9-3p; 451a; 125a-5p; hsa-let-7a-5p; 135a-5p; 423-5p; 487b-3p; 148a-3p; 30c-5p; 1248; 329-3p; 132-3p; 130a-3p; 134-5p; 935; 98-5p; 149-5p; 15a-5p; 194-5p; 129-2-3p; 323a-3p; 132-5p; 33b-5p; 378a-3p; 7-5p; 27b-3p; 204-5p; 27a-3p; 494-3p; hsa-let-7b-5p; 21-5p; 30a-3p; 153-3p; 145-5p; 370-3p; 92b-3p                                                                                                                                                                                            |
| 8  | positive regulation of mesenchymal cell proliferation                           | 5.0906E-19  | 83 | 92a-3p; 17-5p; 20a-5p; 155-5p; 18a-5p; 19a-3p; 19b-1-5p; hsa-let-7c-5p; 142-5p; hsa-let-7e-5p; 92a-1-5p; 744-5p; 16-2-3p; 93-5p; 200c-3p; 19b-3p; 582-5p; 130b-5p; 497-5p; 146a-5p; 181c-5p; 106b-5p; 15b-5p; 130b-3p; 25-3p; 9-5p; 16-5p; 30d-5p; 124-3p; 410-3p; 186-5p; 655-3p; 451a; 505-3p; 125a-5p; 195-5p; 203a-3p; hsa-let-7a-5p; 135a-5p; 423-5p; 487b-3p; 148a-3p; 30c-5p; 1248; 101-5p; 329-3p; 484; 130a-3p; 134-5p; 98-5p; 495-3p; 15a-5p; 129-2-3p; 296-5p; 106a-5p; 323a-3p; 423-3p; 1-3p; 3065-5p; 33b-5p; 378a-3p; 590-5p; 7-5p; 138-5p; 409-3p; 204-5p; 383-5p; 494-3p; 369-3p; hsa-let-7b-5p; 21-5p; 20b-5p; 136-5p; 30a-3p; 338-5p; 454-3p; 211-5p; 145-5p; 370-3p; 504-5p; 125b-5p; 126-3p; 92b-3p                      |
| 9  | negative regulation of cell proliferation involved in heart valve morphogenesis | 1.44197E-18 | 41 | 92a-3p; 17-5p; 20a-5p; 19a-3p; 93-5p; 200c-3p; 19b-3p; 146a-5p; 181c-5p; 106b-5p; 3615; 9-5p; 192-5p; 30d-5p; 30a-5p; 410-3p; 128-3p; 135a-5p; 129-5p; 30c-5p; 30b-5p; 144-3p; 93-3p; 130a-3p; 935; 296-5p; 139-5p; 335-3p; 181d-5p; 7-5p; 27b-3p; 204-5p; 27a-3p; 32-5p; 21-5p; 20b-5p; 30a-3p; 153-3p; 23b-3p; 211-5p; 92b-3p                                                                                                                                                                                                                                                                                                                                                                                                              |
| 10 | negative regulation of mitochondrial depolarization                             | 1.44197E-18 | 49 | 17-5p; 182-5p; 20a-5p; 96-5p; 18a-5p; hsa-let-7c-5p; hsa-let-7e-5p; 93-5p; 200c-3p; 497-5p; 181c-5p; 106b-5p; 15b-5p; 9-5p; 16-5p; 154-5p; 192-5p; 376c-3p; 31-5p; 451a; 125a-5p; 195-5p; 203a-3p; 128-3p; 143-3p; hsa-let-7a-5p; 135a-5p; 148a-3p; 30b-5p; 98-5p; 15a-5p; 106a-5p; 139-5p; 33b-5p; 181d-5p; 7-5p; 27b-3p; 204-5p; 27a-3p; 494-3p; hsa-let-7b-5p; 21-5p; 20b-5p; 136-5p; 153-3p; 23b-3p; 211-5p; 125b-5p; 126-3p                                                                                                                                                                                                                                                                                                             |
| 11 | channel activity                                                                | 1.62726E-18 | 43 | 17-5p; 182-5p; 20a-5p; 96-5p; 18a-5p; 17-3p; 200c-3p; 497-5p; 766-3p; 181c-5p; 15b-5p; 9-5p; 16-5p; 192-5p; 4524a-3p; 376c-3p; 30a-5p; 451a; 125a-5p; 195-5p; 128-3p; 143-3p; hsa-let-7a-5p; 135a-5p; 148a-3p; 30b-5p; 98-5p; 15a-5p; 106a-5p; 139-5p; 33b-5p; 181d-5p; 7-5p; 204-5p; 494-3p; 21-5p; 590-3p; 136-5p; 153-3p; 23b-3p; 211-5p; 125b-5p; 126-3p                                                                                                                                                                                                                                                                                                                                                                                 |
| 12 | channel inhibitor activity                                                      | 1.64933E-18 | 35 | 17-5p; 182-5p; 20a-5p; 96-5p; 18a-5p; 200c-3p; 497-5p; 181c-5p; 15b-5p; 9-5p; 16-5p; 192-5p; 376c-3p; 451a; 125a-5p; 195-5p; 143-3p; hsa-let-7a-5p; 135a-5p; 148a-3p; 30b-5p; 98-5p; 15a-5p; 139-5p; 33b-5p; 181d-5p; 7-5p; 204-5p; 494-3p; 21-5p; 136-5p; 153-3p; 211-5p; 125b-5p; 126-3p                                                                                                                                                                                                                                                                                                                                                                                                                                                   |
| 13 | negative regulation of cellular pH reduction                                    | 1.64933E-18 | 35 | 17-5p; 182-5p; 20a-5p; 96-5p; 18a-5p; 200c-3p; 497-5p; 181c-5p; 15b-5p; 9-5p; 16-5p; 192-5p; 376c-3p; 451a; 125a-5p; 195-5p; 143-3p; hsa-let-7a-5p; 135a-5p; 148a-3p; 30b-5p; 98-5p; 15a-5p; 139-5p; 33b-5p; 181d-5p; 7-5p; 204-5p; 494-3p; 21-5p; 136-5p; 153-3p; 211-5p; 125b-5p; 126-3p                                                                                                                                                                                                                                                                                                                                                                                                                                                   |
| 14 | neuron apoptotic process                                                        | 1.64933E-18 | 81 | 92a-3p; 106b-3p; 17-5p; 182-5p; 20a-5p; 155-5p; 96-5p; 18a-5p; 19a-3p; hsa-let-7c-5p; 17-3p; hsa-let-7e-5p; 1260b; 16-2-3p; 93-5p; 200c-3p; 19b-3p; 497-5p; 766-3p; 181c-5p; 106b-5p; 15b-5p; 130b-3p; 25-3p; 210-3p; 9-5p; 486-5p; 16-5p; 154-5p; 192-5p; 376c-3p; 124-3p; 451a; 125a-5p; 195-5p; 203a-3p; 143-3p; hsa-let-7a-5p; 218-5p; 135a-5p; 423-5p; 148a-3p; 129-5p; 30b-5p; 144-3p; 93-3p; 329-3p; 132-3p; 484; 98-5p; 149-5p; 625-5p; 15a-5p; 361-3p; 26a-5p; 296-5p; 106a-5p; 139-5p; 423-3p; 3065-5p; 33b-5p; 181d-5p; 7-5p; 532-3p; 27b-3p; 204-5p; 27a-3p; 769-3p; 494-3p; hsa-let-7b-5p; 21-5p; 20b-5p; 136-5p; 153-3p; 23b-3p; 211-5p; 145-5p; 125b-5p; 126-3p; 323b-3p; 92b-3p                                              |

|    |                                                    |             |    |                                                                                                                                                                                                                                                                                                                                                                                                                                                                                                                                                                                                                                                                                                                                                                                                                               |
|----|----------------------------------------------------|-------------|----|-------------------------------------------------------------------------------------------------------------------------------------------------------------------------------------------------------------------------------------------------------------------------------------------------------------------------------------------------------------------------------------------------------------------------------------------------------------------------------------------------------------------------------------------------------------------------------------------------------------------------------------------------------------------------------------------------------------------------------------------------------------------------------------------------------------------------------|
| 15 | R-SMAD binding                                     | 1.93271E-18 | 99 | 4488; 92a-3p; 17-5p; 182-5p; 20a-5p; 155-5p; 18a-5p; 19a-3p; 19b-1-5p; hsa-let-7c-5p; 142-5p; 183-5p; 1260b; 744-5p; 16-2-3p; 93-5p; 200c-3p; 19b-3p; 497-5p; 146a-5p; 106b-5p; 15b-5p; 130b-3p; 25-3p; 486-5p; 425-5p; 16-5p; 154-5p; 192-5p; 30d-5p; 381-3p; 376a-3p; 124-3p; 30a-5p; 410-3p; 486-3p; 186-5p; 31-5p; 655-3p; 505-3p; 154-3p; 491-5p; 125a-5p; 195-5p; 203a-3p; 128-3p; 143-3p; 218-5p; 543; 148a-3p; 29b-1-5p; 99a-5p; 144-3p; 654-3p; 101-5p; 31-3p; 93-3p; 329-3p; 132-3p; 484; 130a-3p; 134-5p; 149-5p; 625-5p; 15a-5p; 487a-3p; 361-3p; 26a-5p; 106a-5p; 139-5p; 323a-3p; 1-3p; 335-3p; 144-5p; 18b-5p; 629-5p; 590-5p; 7-5p; 532-3p; 382-5p; 27b-3p; 204-5p; 27a-3p; 369-3p; 376b-3p; 32-5p; 21-5p; 20b-5p; 340-5p; 338-5p; 454-3p; 23b-3p; 211-5p; 145-5p; 370-3p; 125b-5p; 323b-3p; 92b-3p; 770-5p   |
| 16 | I-SMAD binding                                     | 2.31579E-18 | 75 | 92a-3p; 17-5p; 182-5p; 20a-5p; 155-5p; 18a-5p; 19a-3p; hsa-let-7c-5p; 183-5p; 142-3p; 1260b; 744-5p; 93-5p; 19b-3p; 497-5p; 146a-5p; 181c-5p; 106b-5p; 15b-5p; 130b-3p; 25-3p; 486-5p; 425-5p; 16-5p; 154-5p; 30d-5p; 381-3p; 376a-3p; 376c-3p; 124-3p; 30a-5p; 186-5p; 31-5p; 505-3p; 125a-5p; 195-5p; 203a-3p; 379-5p; 128-3p; 218-5p; 148a-3p; 21-3p; 30c-5p; 30b-5p; 144-3p; 329-3p; 132-3p; 484; 130a-3p; 134-5p; 98-5p; 15a-5p; 26a-5p; 106a-5p; 323a-3p; 320c; 144-5p; 18b-5p; 590-5p; 532-3p; 885-5p; 27b-3p; 204-5p; 27a-3p; 769-3p; 32-5p; hsa-let-7b-5p; 21-5p; 20b-5p; 454-3p; 211-5p; 145-5p; 370-3p; 125b-5p; 92b-3p                                                                                                                                                                                            |
| 17 | aortic valve morphogenesis                         | 2.31579E-18 | 99 | 92a-3p; 17-5p; 182-5p; 20a-5p; 155-5p; 96-5p; hsa-let-7c-5p; 142-5p; 183-5p; 142-3p; 744-5p; 873-5p; 93-5p; 200c-3p; 582-5p; 497-5p; 146a-5p; 106b-5p; 15b-5p; 130b-3p; 25-3p; 210-3p; 9-5p; 486-5p; 16-5p; 192-5p; 30d-5p; 381-3p; 1185-5p; 124-3p; 30a-5p; 410-3p; 186-5p; 299-5p; 625-3p; 539-5p; 491-5p; 125a-5p; 195-5p; 203a-3p; 128-3p; 485-5p; 143-3p; 218-5p; 135a-5p; 543; 148a-3p; 129-5p; 29b-1-5p; 30c-5p; 30b-5p; 99a-5p; 380-3p; 144-3p; 101-5p; 93-3p; 329-3p; 132-3p; 130a-3p; 134-5p; 935; 98-5p; 149-5p; 495-3p; 15a-5p; 26a-5p; 296-5p; 106a-5p; 139-5p; 423-3p; 1-3p; 3065-5p; 335-3p; 144-5p; 33b-5p; 590-5p; 7-5p; 138-5p; 27b-3p; 204-5p; 27a-3p; 769-3p; 494-3p; 411-3p; 139-3p; 32-5p; hsa-let-7b-5p; 21-5p; 20b-5p; 136-5p; 30a-3p; 340-5p; 153-3p; 338-5p; 23b-3p; 211-5p; 145-5p; 126-3p; 92b-3p |
| 18 | interleukin-7-mediated signaling pathway           | 2.31579E-18 | 93 | 92a-3p; 106b-3p; 17-5p; 182-5p; 20a-5p; 155-5p; 96-5p; 19a-3p; hsa-let-7c-5p; 1290; 142-5p; 183-5p; hsa-let-7e-5p; 92a-1-5p; 93-5p; 200c-3p; 19b-3p; 130b-5p; 497-5p; 146a-5p; 181c-5p; 106b-5p; 15b-5p; 130b-3p; 9-5p; 16-5p; 192-5p; 30d-5p; 376a-3p; 124-3p; 30a-5p; 410-3p; 186-5p; 299-5p; 539-5p; 125a-5p; 203a-3p; 369-5p; 128-3p; hsa-let-7a-5p; 135a-5p; 423-5p; 148a-3p; 21-3p; 29b-1-5p; 30c-5p; 30b-5p; 380-3p; 628-5p; 144-3p; 31-3p; 93-3p; 329-3p; 132-3p; 484; 130a-3p; 134-5p; 98-5p; 15a-5p; 361-3p; 194-5p; 433-3p; 106a-5p; 139-5p; 323a-3p; 423-3p; 1-3p; 335-3p; 181d-5p; 378a-3p; 629-5p; 487a-5p; 7-5p; 124-5p; 382-5p; 27b-3p; 340-3p; 769-3p; 369-3p; 411-3p; 376b-3p; hsa-let-7b-5p; 21-5p; 20b-5p; 340-5p; 454-3p; 23b-3p; 331-5p; 28-3p; 145-5p; 504-5p; 125b-5p; 126-3p                         |
| 19 | SMAD protein complex assembly                      | 2.50025E-18 | 70 | 92a-3p; 17-5p; 182-5p; 20a-5p; 155-5p; 18a-5p; 19a-3p; 142-5p; 183-5p; 1260b; 744-5p; 93-5p; 19b-3p; 497-5p; 146a-5p; 181c-5p; 106b-5p; 15b-5p; 130b-3p; 25-3p; 486-5p; 425-5p; 16-5p; 154-5p; 30d-5p; 381-3p; 30a-5p; 410-3p; 186-5p; 31-5p; 505-3p; 491-5p; 125a-5p; 195-5p; 203a-3p; 128-3p; 143-3p; 218-5p; 543; 148a-3p; 21-3p; 29b-1-5p; 30c-5p; 30b-5p; 144-3p; 329-3p; 132-3p; 484; 130a-3p; 15a-5p; 433-3p; 26a-5p; 106a-5p; 323a-3p; 144-5p; 181d-5p; 18b-5p; 590-5p; 27b-3p; 204-5p; 27a-3p; 369-3p; 32-5p; 21-5p; 20b-5p; 454-3p; 211-5p; 145-5p; 125b-5p; 92b-3p                                                                                                                                                                                                                                                 |
| 20 | positive regulation of protein import into nucleus | 3.48691E-18 | 90 | 92a-3p; 17-5p; 20a-5p; 155-5p; 96-5p; 18a-5p; 19a-3p; 142-5p; 183-5p; 142-3p; 1260b; 744-5p; 93-5p; 200c-3p; 19b-3p; 497-5p; 146a-5p; 766-3p; 181c-5p; 106b-5p; 15b-5p; 130b-3p; 25-3p; 9-5p; 486-5p; 16-5p; 192-5p; 30d-5p; 376a-3p; 1285-3p; 124-3p; 30a-5p; 410-3p; 486-3p; 186-5p; 9-3p; 31-5p; 655-3p; 505-3p; 491-5p; 125a-5p; 195-5p; 203a-3p; 128-3p; 143-3p; hsa-let-7a-5p; 218-5p; 423-5p; 129-5p; 29b-1-5p; 30c-5p; 144-3p; 654-3p; 101-5p; 31-3p; 93-3p; 329-3p; 132-3p; 484; 130a-3p; 935; 149-5p; 15a-5p; 487a-3p; 26a-5p; 106a-5p; 323a-3p; 1-3p; 181d-5p; 378a-3p; 590-5p; 7-5p; 138-5p; 409-3p; 339-5p; 27b-3p; 204-5p; 27a-3p; 369-3p; hsa-let-7b-5p; 21-5p; 20b-5p; 30a-3p; 454-3p; 23b-3p; 211-5p; 145-5p; 126-3p; 92b-3p; 1296-5p                                                                        |
| 21 | endocardial cell differentiation                   | 4.93865E-18 | 52 | 17-5p; 182-5p; 20a-5p; 155-5p; 18a-5p; 19a-3p; 183-5p; 1260b; 93-5p; 200c-3p; 19b-3p; 146a-5p; 106b-5p; 130b-3p; 9-5p; 154-5p; 30d-5p; 124-3p; 30a-5p; 410-3p; 186-5p; 31-5p; 125a-5p; 203a-3p; 218-5p; 129-5p; 30c-5p; 30b-5p; 144-3p; 132-3p; 130a-3p; 134-5p; 935; 758-3p; 26a-5p; 296-5p; 106a-5p; 139-5p; 1-3p; 335-3p; 144-5p; 27b-3p; 204-5p; 27a-3p; 769-3p; 20b-5p; 30a-3p; 454-3p; 23b-3p; 211-5p; 145-5p; 125b-5p                                                                                                                                                                                                                                                                                                                                                                                                  |

|    |                               |            |    |                                                                                                                                                                                                                                                                                                                                                                                                                                                                           |
|----|-------------------------------|------------|----|---------------------------------------------------------------------------------------------------------------------------------------------------------------------------------------------------------------------------------------------------------------------------------------------------------------------------------------------------------------------------------------------------------------------------------------------------------------------------|
| 22 | necroptotic signaling pathway | 7.1073E-18 | 32 | 92a-3p; 17-5p; 155-5p; 18a-5p; 19a-3p; hsa-let-7e-5p; 92a-1-5p; 19b-3p; 146a-5p; 106b-5p; 15b-5p; 25-3p; 124-3p; 203a-3p; 128-3p; 143-3p; 485-3p; 21-3p; 329-3p; 130a-3p; 98-5p; 149-5p; 758-3p; 106a-5p; 1-3p; 7-5p; 187-3p; 32-5p; 21-5p; 504-5p; 125b-5p; 92b-3p                                                                                                                                                                                                       |
| 23 | COPI vesicle coat             | 2.4429E-17 | 55 | 92a-3p; 106b-3p; 17-5p; 20a-5p; 155-5p; 183-5p; hsa-let-7e-5p; 142-3p; 1260b; 1260a; 744-5p; 93-5p; 582-5p; 130b-5p; 146a-5p; 106b-5p; 15b-5p; 130b-3p; 16-5p; 381-3p; 1185-5p; 376a-3p; 124-3p; 30a-5p; 486-3p; 127-5p; 451a; 539-5p; 125a-5p; 195-5p; hsa-let-7a-5p; 423-5p; 148a-3p; 30c-5p; 101-5p; 93-3p; 484; 98-5p; 15a-5p; 376a-5p; 26a-5p; 139-5p; 423-3p; 1-3p; 27b-3p; 27a-3p; 376b-3p; hsa-let-7b-5p; 20b-5p; 23b-3p; 28-3p; 125b-5p; 92b-3p; 770-5p; 1296-5p |

### ***MiRPathDB GO Molecular function***

| No | subcategory                             | q-value     | number of miRs observed | hsa-miRs                                                                                                                                                                                                                                                                                                                                                                                                                                                                                                                                                                                                                                                                                                                   |
|----|-----------------------------------------|-------------|-------------------------|----------------------------------------------------------------------------------------------------------------------------------------------------------------------------------------------------------------------------------------------------------------------------------------------------------------------------------------------------------------------------------------------------------------------------------------------------------------------------------------------------------------------------------------------------------------------------------------------------------------------------------------------------------------------------------------------------------------------------|
| 1  | enzyme binding                          | 6.946E-23   | 69                      | 92a-3p; 106b-3p; 17-5p; 182-5p; 20a-5p; 155-5p; 96-5p; 18a-5p; 19a-3p; hsa-let-7c-5p; 183-5p; 142-3p; 92a-1-5p; 744-5p; 93-5p; 200c-3p; 19b-3p; 497-5p; 146a-5p; 106b-5p; 15b-5p; 130b-3p; 9-5p; 16-5p; 30d-5p; 30a-5p; 486-3p; 31-5p; 625-3p; 451a; 505-3p; 191-5p; 491-5p; 125a-5p; 195-5p; 203a-3p; 128-3p; hsa-let-7a-5p; 218-5p; 135a-5p; 423-5p; 148a-3p; 30c-5p; 30b-5p; 144-3p; 93-3p; 484; 149-5p; 625-5p; 15a-5p; 106a-5p; 423-3p; 1-3p; 378a-3p; 138-5p; 27b-3p; 204-5p; 27a-3p; 494-3p; hsa-let-7b-5p; 21-5p; 20b-5p; 23b-3p; 211-5p; 145-5p; 125b-5p; 126-3p; 92b-3p; 1296-5p                                                                                                                                 |
| 2  | protein binding                         | 6.56347E-18 | 71                      | 17-5p; 182-5p; 20a-5p; 155-5p; 96-5p; 18a-5p; 19a-3p; hsa-let-7c-5p; 17-3p; 92a-1-5p; 744-5p; 93-5p; 200c-3p; 19b-3p; 497-5p; 106b-5p; 15b-5p; 130b-3p; 25-3p; 9-5p; 192-5p; 30d-5p; 124-3p; 30a-5p; 186-5p; 31-5p; 625-3p; 451a; 505-3p; 191-5p; 125a-5p; 195-5p; 203a-3p; 128-3p; hsa-let-7a-5p; 218-5p; 423-5p; 148a-3p; 656-3p; 30c-5p; 30b-5p; 99a-5p; 93-3p; 484; 130a-3p; 98-5p; 149-5p; 625-5p; 15a-5p; 26a-5p; 106a-5p; 139-5p; 423-3p; 320c; 1-3p; 378a-3p; 7-5p; 320d; 138-5p; 27b-3p; 27a-3p; 494-3p; hsa-let-7b-5p; 21-5p; 20b-5p; 23b-3p; 145-5p; 125b-5p; 126-3p; 92b-3p; 1296-5p                                                                                                                           |
| 3  | protein serinethreonine kinase activity | 1.01174E-16 | 51                      | 17-5p; 182-5p; 20a-5p; 155-5p; 96-5p; 1246; 19a-3p; hsa-let-7c-5p; 744-5p; 93-5p; 200c-3p; 19b-3p; 582-5p; 497-5p; 146a-5p; 181c-5p; 15b-5p; 9-5p; 16-5p; 192-5p; 376c-3p; 410-3p; 451a; 125a-5p; 195-5p; 203a-3p; 128-3p; hsa-let-7a-5p; 218-5p; 135a-5p; 148a-3p; 99a-5p; 93-3p; 130a-3p; 625-5p; 15a-5p; 26a-5p; 106a-5p; 1-3p; 33b-5p; 378a-3p; 138-5p; 27b-3p; 27a-3p; 494-3p; hsa-let-7b-5p; 21-5p; 153-3p; 145-5p; 125b-5p; 126-3p                                                                                                                                                                                                                                                                                  |
| 4  | transferase activity                    | 1.11151E-15 | 46                      | 92a-3p; 17-5p; 20a-5p; 155-5p; 96-5p; 19a-3p; 17-3p; 183-5p; 744-5p; 93-5p; 200c-3p; 19b-3p; 497-5p; 106b-5p; 15b-5p; 130b-3p; 16-5p; 192-5p; 376c-3p; 186-5p; 451a; 125a-5p; 195-5p; 203a-3p; 128-3p; hsa-let-7a-5p; 218-5p; 135a-5p; 148a-3p; 30c-5p; 101-5p; 93-3p; 484; 130a-3p; 98-5p; 15a-5p; 26a-5p; 106a-5p; 27b-3p; 27a-3p; hsa-let-7b-5p; 21-5p; 20b-5p; 145-5p; 125b-5p; 126-3p                                                                                                                                                                                                                                                                                                                                 |
| 5  | organic cyclic compound binding         | 1.87526E-14 | 85                      | 92a-3p; 106b-3p; 17-5p; 182-5p; 20a-5p; 155-5p; 96-5p; 18a-5p; 1246; 19a-3p; hsa-let-7c-5p; 17-3p; 142-5p; 183-5p; hsa-let-7e-5p; 1260b; 92a-1-5p; 744-5p; 93-5p; 200c-3p; 19b-3p; 582-5p; 497-5p; 181c-5p; 106b-5p; 15b-5p; 25-3p; 210-3p; 9-5p; 425-5p; 16-5p; 381-3p; 376c-3p; 30a-5p; 410-3p; 186-5p; 31-5p; 539-5p; 505-3p; 491-5p; 125a-5p; 195-5p; 203a-3p; hsa-let-7a-5p; 218-5p; 135a-5p; 423-5p; 148a-3p; 30c-5p; 30b-5p; 99a-5p; 628-5p; 144-3p; 654-3p; 93-3p; 484; 130a-3p; 935; 149-5p; 15a-5p; 26a-5p; 106a-5p; 139-5p; 323a-3p; 423-3p; 320c; 1-3p; 33b-5p; 181d-5p; 378a-3p; 320d; 138-5p; 27b-3p; 27a-3p; 494-3p; hsa-let-7b-5p; 21-5p; 340-5p; 23b-3p; 145-5p; 125b-5p; 99b-5p; 92b-3p; 770-5p; 1296-5p |
| 6  | protein kinase binding                  | 7.40314E-14 | 44                      | 92a-3p; 17-5p; 182-5p; 20a-5p; 155-5p; 96-5p; 18a-5p; 19a-3p; 142-5p; 744-5p; 200c-3p; 497-5p; 15b-5p; 16-5p; 124-3p; 30a-5p; 486-3p; 186-5p; 31-5p; 625-3p; 451a; 505-3p; 491-5p; 125a-5p; 195-5p; 218-5p; 135a-5p; 148a-3p; 30c-5p; 30b-5p; 484; 149-5p; 15a-5p; 106a-5p; 323a-3p; 378a-3p; 138-5p; 27a-3p; 369-3p; hsa-let-7b-5p; 21-5p; 145-5p; 126-3p; 92b-3p                                                                                                                                                                                                                                                                                                                                                         |

|    |                                                               |             |    |                                                                                                                                                                                                                                                                                                                                                                                                                                                                                                                                                                                                                                                                                                                                    |
|----|---------------------------------------------------------------|-------------|----|------------------------------------------------------------------------------------------------------------------------------------------------------------------------------------------------------------------------------------------------------------------------------------------------------------------------------------------------------------------------------------------------------------------------------------------------------------------------------------------------------------------------------------------------------------------------------------------------------------------------------------------------------------------------------------------------------------------------------------|
| 7  | double-stranded DNA binding                                   | 2.5096E-13  | 61 | 106b-3p; 17-5p; 182-5p; 20a-5p; 155-5p; 96-5p; 18a-5p; 19a-3p; hsa-let-7c-5p; 142-5p; 92a-1-5p; 93-5p; 200c-3p; 19b-3p; 582-5p; 497-5p; 146a-5p; 106b-5p; 15b-5p; 130b-3p; 210-3p; 9-5p; 30d-5p; 381-3p; 410-3p; 9-3p; 31-5p; 539-5p; 191-5p; 491-5p; 125a-5p; 195-5p; 203a-3p; 128-3p; 218-5p; 135a-5p; 423-5p; 543; 485-3p; 30c-5p; 144-3p; 130a-3p; 149-5p; 625-5p; 15a-5p; 26a-5p; 106a-5p; 139-5p; 320c; 33b-5p; 378a-3p; 138-5p; 885-5p; 27b-3p; 204-5p; 27a-3p; 21-5p; 211-5p; 145-5p; 125b-5p; 126-3p                                                                                                                                                                                                                      |
| 8  | nucleic acid binding                                          | 2.5096E-13  | 86 | 92a-3p; 106b-3p; 17-5p; 182-5p; 20a-5p; 155-5p; 96-5p; 18a-5p; 19a-3p; hsa-let-7c-5p; 17-3p; 142-5p; 183-5p; hsa-let-7e-5p; 1260b; 92a-1-5p; 744-5p; 93-5p; 200c-3p; 19b-3p; 582-5p; 497-5p; 766-3p; 181c-5p; 106b-5p; 15b-5p; 25-3p; 210-3p; 425-5p; 16-5p; 30d-5p; 381-3p; 30a-5p; 410-3p; 186-5p; 31-5p; 655-3p; 539-5p; 505-3p; 491-5p; 125a-5p; 195-5p; 203a-3p; hsa-let-7a-5p; 218-5p; 135a-5p; 423-5p; 543; 485-3p; 148a-3p; 30c-5p; 30b-5p; 99a-5p; 144-3p; 93-3p; 484; 130a-3p; 935; 149-5p; 15a-5p; 26a-5p; 106a-5p; 139-5p; 323a-3p; 423-3p; 425-3p; 320c; 1-3p; 335-3p; 33b-5p; 181d-5p; 378a-3p; 590-5p; 320d; 138-5p; 27b-3p; 27a-3p; hsa-let-7b-5p; 21-5p; 340-5p; 23b-3p; 145-5p; 125b-5p; 92b-3p; 770-5p; 1296-5p |
| 9  | molecular function                                            | 5.31932E-13 | 47 | 106b-3p; 182-5p; 155-5p; 96-5p; 18a-5p; 19a-3p; hsa-let-7c-5p; 17-3p; 744-5p; 200c-3p; 19b-3p; 497-5p; 15b-5p; 130b-3p; 25-3p; 9-5p; 30d-5p; 30a-5p; 186-5p; 31-5p; 125a-5p; 195-5p; 203a-3p; 128-3p; hsa-let-7a-5p; 218-5p; 423-5p; 148a-3p; 30c-5p; 30b-5p; 99a-5p; 484; 130a-3p; 98-5p; 149-5p; 15a-5p; 26a-5p; 139-5p; 1-3p; 27b-3p; 27a-3p; 21-5p; 23b-3p; 145-5p; 125b-5p; 126-3p; 92b-3p                                                                                                                                                                                                                                                                                                                                    |
| 10 | catalytic activity                                            | 9.55184E-13 | 33 | 92a-3p; 106b-3p; 17-5p; 155-5p; 96-5p; 19a-3p; 183-5p; 744-5p; 200c-3p; 146a-5p; 210-3p; 16-5p; 192-5p; 30a-5p; 186-5p; 451a; 125a-5p; 203a-3p; 218-5p; 487b-3p; 148a-3p; 30c-5p; 99a-5p; 484; 15a-5p; 26a-5p; 1-3p; 494-3p; hsa-let-7b-5p; 21-5p; 145-5p; 125b-5p; 126-3p                                                                                                                                                                                                                                                                                                                                                                                                                                                         |
| 11 | transcription regulatory region sequence-specific DNA binding | 9.55184E-13 | 57 | 17-5p; 182-5p; 20a-5p; 155-5p; 18a-5p; 19a-3p; hsa-let-7c-5p; 142-5p; 92a-1-5p; 93-5p; 200c-3p; 19b-3p; 582-5p; 497-5p; 106b-5p; 130b-3p; 210-3p; 9-5p; 30d-5p; 381-3p; 410-3p; 9-3p; 31-5p; 655-3p; 539-5p; 191-5p; 491-5p; 125a-5p; 195-5p; 203a-3p; 128-3p; 218-5p; 135a-5p; 423-5p; 543; 485-3p; 30c-5p; 30b-5p; 144-3p; 130a-3p; 149-5p; 625-5p; 15a-5p; 106a-5p; 139-5p; 323a-3p; 320c; 33b-5p; 378a-3p; 138-5p; 204-5p; 27a-3p; 21-5p; 211-5p; 145-5p; 125b-5p; 126-3p                                                                                                                                                                                                                                                      |
| 12 | protein domain specific binding                               | 1.08813E-12 | 44 | 92a-3p; 106b-3p; 17-5p; 20a-5p; 155-5p; 18a-5p; 744-5p; 200c-3p; 582-5p; 497-5p; 146a-5p; 15b-5p; 130b-3p; 486-5p; 16-5p; 124-3p; 30a-5p; 31-5p; 655-3p; 491-5p; 125a-5p; 195-5p; 203a-3p; 218-5p; 135a-5p; 423-5p; 543; 148a-3p; 656-3p; 30c-5p; 329-3p; 484; 149-5p; 15a-5p; 323a-3p; 1-3p; 378a-3p; 27a-3p; hsa-let-7b-5p; 21-5p; 23b-3p; 145-5p; 126-3p; 1296-5p                                                                                                                                                                                                                                                                                                                                                               |
| 13 | transcription regulatory region DNA binding                   | 1.81144E-12 | 61 | 17-5p; 182-5p; 20a-5p; 155-5p; 18a-5p; 19a-3p; hsa-let-7c-5p; 142-5p; 92a-1-5p; 93-5p; 200c-3p; 19b-3p; 497-5p; 146a-5p; 106b-5p; 15b-5p; 130b-3p; 210-3p; 9-5p; 30d-5p; 381-3p; 410-3p; 9-3p; 31-5p; 655-3p; 539-5p; 191-5p; 491-5p; 125a-5p; 195-5p; 203a-3p; 128-3p; 218-5p; 135a-5p; 423-5p; 543; 485-3p; 30c-5p; 99a-5p; 144-3p; 130a-3p; 149-5p; 625-5p; 15a-5p; 26a-5p; 106a-5p; 139-5p; 320c; 33b-5p; 378a-3p; 590-5p; 138-5p; 885-5p; 27b-3p; 204-5p; 27a-3p; 494-3p; 21-5p; 211-5p; 145-5p; 125b-5p; 126-3p                                                                                                                                                                                                              |
| 14 | RNA binding                                                   | 3.38632E-12 | 51 | 92a-3p; 106b-3p; 182-5p; 155-5p; 18a-5p; 17-3p; 183-5p; hsa-let-7e-5p; 1260b; 92a-1-5p; 744-5p; 582-5p; 497-5p; 15b-5p; 25-3p; 425-5p; 16-5p; 628-3p; 30a-5p; 186-5p; 31-5p; 539-5p; 505-3p; 491-5p; 195-5p; hsa-let-7a-5p; 218-5p; 423-5p; 148a-3p; 30c-5p; 99a-5p; 93-3p; 484; 935; 149-5p; 15a-5p; 26a-5p; 323a-3p; 423-3p; 1-3p; 378a-3p; 27b-3p; 27a-3p; hsa-let-7b-5p; 30a-3p; 99b-3p; 338-5p; 23b-3p; 125b-5p; 92b-3p; 1296-5p                                                                                                                                                                                                                                                                                              |

### MiRPathDB KEGG

| No | subcategory | q-value | number of miRs observed | hsa-miRs |
|----|-------------|---------|-------------------------|----------|
|----|-------------|---------|-------------------------|----------|

|   |                         |             |    |                                                                                                                                                                                                                                                                                                                                                                                                                                                                                                                                                                                                                                                                                                                                                                        |
|---|-------------------------|-------------|----|------------------------------------------------------------------------------------------------------------------------------------------------------------------------------------------------------------------------------------------------------------------------------------------------------------------------------------------------------------------------------------------------------------------------------------------------------------------------------------------------------------------------------------------------------------------------------------------------------------------------------------------------------------------------------------------------------------------------------------------------------------------------|
| 1 | miRNAs in cancer        | 1.31513E-18 | 90 | 92a-3p; 17-5p; 182-5p; 20a-5p; 155-5p; 96-5p; 18a-5p; 19a-3p; 19b-1-5p; hsa-let-7c-5p; 17-3p; 142-5p; 183-5p; hsa-let-7e-5p; 744-5p; 16-2-3p; 93-5p; 200c-3p; 497-5p; 146a-5p; 181c-5p; 106b-5p; 15b-5p; 25-3p; 9-5p; 425-5p; 16-5p; 376c-3p; 628-3p; 124-3p; 30a-5p; 9-3p; 31-5p; 451a; 191-5p; 491-5p; 125a-5p; 195-5p; 203a-3p; 369-5p; 128-3p; 143-3p; hsa-let-7a-5p; 218-5p; 135a-5p; 543; 487b-3p; 148a-3p; 21-3p; 29b-1-5p; 30c-5p; 144-3p; 31-3p; 132-3p; 130a-3p; 134-5p; 98-5p; 15a-5p; 95-3p; 194-5p; 433-3p; 129-2-3p; 26a-5p; 106a-5p; 139-5p; 323a-3p; 1-3p; 144-5p; 33b-5p; 18b-5p; 378a-3p; 7-5p; 138-5p; 27b-3p; 204-5p; 27a-3p; 494-3p; 32-5p; hsa-let-7b-5p; 21-5p; 20b-5p; 30a-3p; 340-5p; 153-3p; 23b-3p; 211-5p; 145-5p; 504-5p; 125b-5p; 126-3p |
| 2 | proteoglycans in cancer | 9.5499E-15  | 63 | 17-5p; 155-5p; 18a-5p; 19a-3p; hsa-let-7c-5p; 142-5p; 744-5p; 200c-3p; 582-5p; 497-5p; 146a-5p; 106b-5p; 15b-5p; 16-5p; 376c-3p; 124-3p; 30a-5p; 9-3p; 31-5p; 625-3p; 451a; 125a-5p; 195-5p; 203a-3p; 143-3p; hsa-let-7a-5p; 218-5p; 135a-5p; 487b-3p; 148a-3p; 21-3p; 30c-5p; 329-3p; 132-3p; 935; 98-5p; 95-3p; 194-5p; 433-3p; 26a-5p; 106a-5p; 139-5p; 323a-3p; 1-3p; 144-5p; 18b-5p; 378a-3p; 590-5p; 7-5p; 138-5p; 187-3p; 885-5p; 204-5p; 27a-3p; 494-3p; 21-5p; 30a-3p; 340-5p; 23b-3p; 145-5p; 125b-5p; 126-3p; 1249-3p                                                                                                                                                                                                                                       |
| 3 | hepatitis B             | 3.62524E-14 | 64 | 17-5p; 182-5p; 20a-5p; 155-5p; 18a-5p; 19a-3p; hsa-let-7c-5p; 142-5p; 92a-1-5p; 93-5p; 200c-3p; 497-5p; 146a-5p; 106b-5p; 15b-5p; 25-3p; 425-5p; 16-5p; 124-3p; 9-3p; 451a; 125a-5p; 195-5p; 203a-3p; 143-3p; hsa-let-7a-5p; 135a-5p; 543; 487b-3p; 148a-3p; 21-3p; 29b-1-5p; 30c-5p; 132-3p; 130a-3p; 98-5p; 15a-5p; 95-3p; 433-3p; 26a-5p; 106a-5p; 139-5p; 323a-3p; 144-5p; 33b-5p; 378a-3p; 590-5p; 7-5p; 138-5p; 204-5p; 27a-3p; 494-3p; 32-5p; hsa-let-7b-5p; 21-5p; 20b-5p; 30a-3p; 23b-3p; 28-3p; 211-5p; 145-5p; 125b-5p; 126-3p; 323b-3p                                                                                                                                                                                                                     |
| 4 | FoxO signaling pathway  | 6.75084E-13 | 62 | 17-5p; 182-5p; 155-5p; 96-5p; 18a-5p; 19a-3p; hsa-let-7c-5p; 142-5p; hsa-let-7e-5p; 92a-1-5p; 200c-3p; 497-5p; 146a-5p; 15b-5p; 9-5p; 486-5p; 425-5p; 16-5p; 376a-3p; 376c-3p; 124-3p; 30a-5p; 451a; 125a-5p; 195-5p; 203a-3p; 128-3p; 143-3p; hsa-let-7a-5p; 543; 148a-3p; 21-3p; 29b-1-5p; 132-3p; 130a-3p; 98-5p; 15a-5p; 95-3p; 194-5p; 26a-5p; 106a-5p; 139-5p; 323a-3p; 144-5p; 18b-5p; 378a-3p; 590-5p; 432-5p; 7-5p; 127-3p; 885-5p; 27b-3p; 27a-3p; 494-3p; hsa-let-7b-5p; 21-5p; 340-5p; 23b-3p; 145-5p; 370-3p; 125b-5p; 126-3p                                                                                                                                                                                                                             |
| 5 | pathways in cancer      | 6.45929E-12 | 70 | 92a-3p; 17-5p; 182-5p; 20a-5p; 155-5p; 96-5p; 18a-5p; 1246; 19a-3p; hsa-let-7c-5p; 142-5p; 93-5p; 200c-3p; 582-5p; 497-5p; 146a-5p; 106b-5p; 15b-5p; 9-5p; 486-5p; 425-5p; 16-5p; 376c-3p; 124-3p; 9-3p; 451a; 491-5p; 125a-5p; 195-5p; 203a-3p; 128-3p; 143-3p; hsa-let-7a-5p; 218-5p; 135a-5p; 543; 487b-3p; 148a-3p; 29b-1-5p; 329-3p; 132-3p; 130a-3p; 98-5p; 15a-5p; 95-3p; 194-5p; 433-3p; 26a-5p; 106a-5p; 139-5p; 1-3p; 144-5p; 378a-3p; 590-5p; 7-5p; 138-5p; 885-5p; 204-5p; 27a-3p; 494-3p; 21-5p; 20b-5p; 30a-3p; 23b-3p; 28-3p; 145-5p; 370-3p; 125b-5p; 126-3p; 1249-3p                                                                                                                                                                                  |
| 6 | HTLV-I infection        | 1.49081E-11 | 48 | 17-5p; 182-5p; 155-5p; 96-5p; 18a-5p; 19a-3p; 93-5p; 200c-3p; 497-5p; 146a-5p; 106b-5p; 15b-5p; 9-5p; 16-5p; 376c-3p; 124-3p; 30a-5p; 451a; 125a-5p; 195-5p; 203a-3p; 143-3p; 543; 487b-3p; 148a-3p; 29b-1-5p; 132-3p; 130a-3p; 935; 15a-5p; 95-3p; 26a-5p; 106a-5p; 139-5p; 323a-3p; 590-5p; 7-5p; 138-5p; 27b-3p; 27a-3p; 494-3p; 21-5p; 30a-3p; 23b-3p; 28-3p; 145-5p; 125b-5p; 126-3p                                                                                                                                                                                                                                                                                                                                                                              |
| 7 | bladder cancer          | 8.14716E-11 | 49 | 17-5p; 20a-5p; 155-5p; 19a-3p; hsa-let-7c-5p; 142-5p; 93-5p; 200c-3p; 497-5p; 146a-5p; 106b-5p; 15b-5p; 130b-3p; 25-3p; 425-5p; 16-5p; 376c-3p; 9-3p; 451a; 491-5p; 125a-5p; 195-5p; 203a-3p; 143-3p; hsa-let-7a-5p; 135a-5p; 487b-3p; 148a-3p; 132-3p; 130a-3p; 134-5p; 98-5p; 95-3p; 106a-5p; 1-3p; 18b-5p; 378a-3p; 590-5p; 7-5p; 27a-3p; 494-3p; hsa-let-7b-5p; 21-5p; 20b-5p; 30a-3p; 28-3p; 145-5p; 125b-5p; 126-3p                                                                                                                                                                                                                                                                                                                                              |
| 8 | colorectal cancer       | 5.88032E-10 | 49 | 17-5p; 20a-5p; 155-5p; 96-5p; 18a-5p; 1246; 19a-3p; 142-5p; 93-5p; 200c-3p; 582-5p; 497-5p; 146a-5p; 106b-5p; 15b-5p; 425-5p; 16-5p; 30a-5p; 451a; 125a-5p; 195-5p; 203a-3p; 143-3p; 135a-5p; 487b-3p; 148a-3p; 29b-1-5p; 30c-5p; 130a-3p; 378i; 15a-5p; 106a-5p; 139-5p; 323a-3p; 33b-5p; 378a-3p; 590-5p; 7-5p; 138-5p; 409-3p; 885-5p; 27a-3p; 494-3p; 21-5p; 378d; 211-5p; 145-5p; 125b-5p; 126-3p                                                                                                                                                                                                                                                                                                                                                                 |
| 9 | prostate cancer         | 1.06413E-09 | 62 | 92a-3p; 17-5p; 182-5p; 20a-5p; 155-5p; 96-5p; 19a-3p; 744-5p; 93-5p; 200c-3p; 582-5p; 497-5p; 146a-5p; 106b-5p; 15b-5p; 25-3p; 9-5p; 486-5p; 425-5p; 16-5p; 376a-3p; 376c-3p; 124-3p; 9-3p; 451a; 125a-5p; 195-5p; 203a-3p; 128-3p; 143-3p; hsa-let-7a-5p; 218-5p; 135a-5p; 543; 148a-3p; 132-3p; 98-5p; 15a-5p; 95-3p; 194-5p; 433-3p; 26a-5p; 106a-5p; 139-5p; 144-5p; 378a-3p; 590-5p; 7-5p; 885-5p; 204-5p; 27a-3p; 494-3p; hsa-let-7b-5p; 21-5p; 20b-5p; 153-3p; 23b-3p; 28-3p; 145-5p; 370-3p; 125b-5p; 126-3p                                                                                                                                                                                                                                                   |

|    |                              |             |    |                                                                                                                                                                                                                                                                                                                                                                                                                                                                                        |
|----|------------------------------|-------------|----|----------------------------------------------------------------------------------------------------------------------------------------------------------------------------------------------------------------------------------------------------------------------------------------------------------------------------------------------------------------------------------------------------------------------------------------------------------------------------------------|
| 10 | chronic myeloid leukemia     | 2.35454E-09 | 57 | 17-5p; 20a-5p; 155-5p; 18a-5p; 19a-3p; hsa-let-7c-5p; 142-5p; 93-5p; 200c-3p; 497-5p; 146a-5p; 106b-5p; 15b-5p; 425-5p; 16-5p; 376c-3p; 124-3p; 9-3p; 451a; 125a-5p; 195-5p; 203a-3p; 143-3p; hsa-let-7a-5p; 543; 487b-3p; 148a-3p; 29b-1-5p; 132-3p; 130a-3p; 98-5p; 378i; 15a-5p; 95-3p; 26a-5p; 106a-5p; 139-5p; 323a-3p; 144-5p; 378a-3p; 590-5p; 7-5p; 138-5p; 27a-3p; 494-3p; hsa-let-7b-5p; 21-5p; 20b-5p; 30a-3p; 340-5p; 378d; 23b-3p; 28-3p; 145-5p; 370-3p; 125b-5p; 126-3p |
| 11 | renal cell carcinoma         | 2.57674E-09 | 39 | 155-5p; 19a-3p; 142-5p; 93-5p; 200c-3p; 497-5p; 15b-5p; 16-5p; 9-3p; 625-3p; 451a; 125a-5p; 195-5p; 203a-3p; 143-3p; 543; 378c; 30c-5p; 329-3p; 132-3p; 134-5p; 378i; 15a-5p; 194-5p; 433-3p; 106a-5p; 139-5p; 378a-3p; 7-5p; 409-3p; 27a-3p; 494-3p; 21-5p; 30a-3p; 378d; 23b-3p; 145-5p; 125b-5p; 126-3p                                                                                                                                                                             |
| 12 | toxoplasmosis                | 2.85519E-09 | 26 | 17-5p; 155-5p; 19a-3p; 497-5p; 146a-5p; 15b-5p; 30d-5p; 124-3p; 30a-5p; 9-3p; 625-3p; 451a; 125a-5p; 203a-3p; 143-3p; 148a-3p; 29b-1-5p; 132-3p; 15a-5p; 106a-5p; 7-5p; 138-5p; 494-3p; 21-5p; 125b-5p; 126-3p                                                                                                                                                                                                                                                                         |
| 13 | pancreatic cancer            | 4.68161E-09 | 49 | 17-5p; 20a-5p; 155-5p; 18a-5p; 19a-3p; 142-5p; 93-5p; 200c-3p; 582-5p; 497-5p; 146a-5p; 106b-5p; 15b-5p; 486-5p; 16-5p; 30a-5p; 9-3p; 451a; 491-5p; 125a-5p; 195-5p; 203a-3p; 128-3p; 143-3p; hsa-let-7a-5p; 148a-3p; 21-3p; 29b-1-5p; 30c-5p; 329-3p; 132-3p; 378i; 15a-5p; 106a-5p; 323a-3p; 378a-3p; 590-5p; 7-5p; 138-5p; 27a-3p; 494-3p; 21-5p; 20b-5p; 378d; 23b-3p; 28-3p; 145-5p; 125b-5p; 126-3p                                                                              |
| 14 | HIF-1 signaling pathway      | 2.07991E-08 | 37 | 182-5p; 155-5p; 96-5p; hsa-let-7c-5p; 1260b; 200c-3p; 497-5p; 15b-5p; 486-5p; 9-3p; 625-3p; 451a; 125a-5p; 203a-3p; 143-3p; hsa-let-7a-5p; 148a-3p; 132-3p; 134-5p; 935; 98-5p; 194-5p; 433-3p; 106a-5p; 139-5p; 378a-3p; 7-5p; 138-5p; 27a-3p; 494-3p; hsa-let-7b-5p; 21-5p; 145-5p; 125b-5p; 99b-5p; 126-3p; 1296-5p                                                                                                                                                                 |
| 15 | PI3K-Akt signaling pathway   | 2.09564E-08 | 48 | 17-5p; 182-5p; 155-5p; 96-5p; 19a-3p; hsa-let-7c-5p; 200c-3p; 582-5p; 497-5p; 146a-5p; 15b-5p; 425-5p; 16-5p; 124-3p; 30a-5p; 451a; 125a-5p; 195-5p; 203a-3p; 143-3p; hsa-let-7a-5p; 218-5p; 135a-5p; 487b-3p; 148a-3p; 29b-1-5p; 98-5p; 15a-5p; 95-3p; 433-3p; 26a-5p; 106a-5p; 139-5p; 1-3p; 144-5p; 33b-5p; 378a-3p; 7-5p; 138-5p; 27a-3p; 494-3p; 32-5p; 21-5p; 30a-3p; 153-3p; 145-5p; 125b-5p; 126-3p                                                                            |
| 16 | Epstein-Barr virus infection | 3.35926E-08 | 38 | 92a-3p; 155-5p; 19a-3p; hsa-let-7e-5p; 744-5p; 200c-3p; 497-5p; 146a-5p; 15b-5p; 16-5p; 30d-5p; 30a-5p; 625-3p; 451a; 125a-5p; 195-5p; 203a-3p; 143-3p; hsa-let-7a-5p; 148a-3p; 29b-1-5p; 30c-5p; 31-3p; 935; 98-5p; 149-5p; 15a-5p; 423-3p; 33b-5p; 378a-3p; 138-5p; hsa-let-7b-5p; 21-5p; 30a-3p; 23b-3p; 145-5p; 125b-5p; 126-3p                                                                                                                                                    |
| 17 | influenza A                  | 3.35926E-08 | 24 | 17-5p; 155-5p; 19a-3p; 93-5p; 497-5p; 146a-5p; 106b-5p; 15b-5p; 16-5p; 30a-5p; 625-3p; 451a; 125a-5p; 203a-3p; 143-3p; 15a-5p; 106a-5p; 139-5p; 7-5p; 494-3p; 21-5p; 20b-5p; 125b-5p; 126-3p                                                                                                                                                                                                                                                                                           |
| 18 | TGF-beta signaling pathway   | 6.72617E-08 | 30 | 17-5p; 20a-5p; 19a-3p; hsa-let-7c-5p; 93-5p; 200c-3p; 146a-5p; 106b-5p; 15b-5p; 451a; 125a-5p; 203a-3p; 135a-5p; 487b-3p; 148a-3p; 29b-1-5p; 31-3p; 130a-3p; 98-5p; 194-5p; 323a-3p; 144-5p; 378a-3p; 590-5p; 27b-3p; 27a-3p; 21-5p; 20b-5p; 145-5p; 126-3p                                                                                                                                                                                                                            |
| 19 | mTOR signaling pathway       | 1.92112E-07 | 28 | 17-5p; 155-5p; 19a-3p; 142-5p; 744-5p; 200c-3p; 497-5p; 15b-5p; 9-3p; 625-3p; 451a; 125a-5p; 195-5p; 203a-3p; 128-3p; 143-3p; 378i; 106a-5p; 378a-3p; 7-5p; 138-5p; 27a-3p; 494-3p; 21-5p; 378d; 145-5p; 125b-5p; 126-3p                                                                                                                                                                                                                                                               |
| 20 | ErbB signaling pathway       | 2.04104E-07 | 38 | 155-5p; 19a-3p; hsa-let-7c-5p; 744-5p; 200c-3p; 497-5p; 15b-5p; 16-5p; 124-3p; 9-3p; 625-3p; 451a; 125a-5p; 195-5p; 203a-3p; 143-3p; hsa-let-7a-5p; 135a-5p; 543; 487b-3p; 132-3p; 134-5p; 98-5p; 15a-5p; 433-3p; 139-5p; 323a-3p; 33b-5p; 378a-3p; 7-5p; 138-5p; 27a-3p; 494-3p; 30a-3p; 23b-3p; 145-5p; 125b-5p; 126-3p                                                                                                                                                              |
| 21 | measles                      | 2.04104E-07 | 32 | 17-5p; 155-5p; 18a-5p; 19a-3p; 200c-3p; 497-5p; 146a-5p; 106b-5p; 15b-5p; 16-5p; 625-3p; 451a; 125a-5p; 195-5p; 203a-3p; 143-3p; hsa-let-7a-5p; 29b-1-5p; 98-5p; 15a-5p; 26a-5p; 106a-5p; 144-5p; 7-5p; 138-5p; 21-5p; 20b-5p; 340-5p; 23b-3p; 504-5p; 125b-5p; 126-3p                                                                                                                                                                                                                 |
| 22 | focal adhesion               | 3.07512E-07 | 43 | 182-5p; 155-5p; 96-5p; 19a-3p; hsa-let-7c-5p; 142-5p; 744-5p; 200c-3p; 497-5p; 146a-5p; 15b-5p; 486-5p; 16-5p; 376c-3p; 124-3p; 30a-5p; 625-3p; 451a; 125a-5p; 195-5p; 203a-3p; 143-3p; 218-5p; 135a-5p; 148a-3p; 29b-1-5p; 15a-5p; 194-5p; 106a-5p; 139-5p; 1-3p; 144-5p; 33b-5p; 378a-3p; 7-5p; 138-5p; 885-5p; 27b-3p; 494-3p; 23b-3p; 145-5p; 125b-5p; 126-3p                                                                                                                      |
| 23 | p53 signaling pathway        | 3.16611E-07 | 47 | 17-5p; 182-5p; 20a-5p; 155-5p; 96-5p; 18a-5p; 19a-3p; hsa-let-7c-5p; hsa-let-7e-5p; 92a-1-5p; 93-5p; 200c-3p; 19b-3p; 582-5p; 497-5p; 146a-5p; 106b-5p; 15b-5p; 486-5p; 425-5p; 16-5p; 376c-3p; 30a-5p; 195-5p; hsa-let-7a-5p; 543; 148a-3p; 21-3p; 30c-5p; 98-5p; 15a-5p; 95-3p; 26a-5p; 106a-5p; 323a-3p; 144-5p; 18b-5p; 138-5p; 494-3p; hsa-let-7b-5p; 21-5p; 20b-5p; 340-5p; 23b-3p; 145-5p; 504-5p; 125b-5p                                                                      |

|    |                                         |             |    |                                                                                                                                                                                                                                                                                                                                                                                                                 |
|----|-----------------------------------------|-------------|----|-----------------------------------------------------------------------------------------------------------------------------------------------------------------------------------------------------------------------------------------------------------------------------------------------------------------------------------------------------------------------------------------------------------------|
| 24 | prolactin signaling pathway             | 4.67698E-07 | 34 | 155-5p; 96-5p; 19a-3p; 19b-1-5p; 142-5p; 19b-3p; 497-5p; 146a-5p; 15b-5p; 124-3p; 9-3p; 451a; 125a-5p; 195-5p; 203a-3p; 143-3p; hsa-let-7a-5p; 543; 29b-1-5p; 30c-5p; 433-3p; 26a-5p; 139-5p; 378a-3p; 7-5p; 138-5p; 27a-3p; 494-3p; 21-5p; 340-5p; 23b-3p; 145-5p; 125b-5p; 126-3p                                                                                                                             |
| 25 | Chagas disease American trypanosomiasis | 5.27049E-07 | 22 | 155-5p; 18a-5p; 19a-3p; 146a-5p; 15b-5p; 486-5p; 9-3p; 451a; 125a-5p; 203a-3p; 143-3p; 29b-1-5p; 106a-5p; 139-5p; 1-3p; 590-5p; 7-5p; 138-5p; 409-3p; 21-5p; 145-5p; 126-3p                                                                                                                                                                                                                                     |
| 26 | neurotrophin signaling pathway          | 9.15591E-07 | 36 | 155-5p; 96-5p; 19a-3p; 142-5p; 744-5p; 200c-3p; 497-5p; 146a-5p; 15b-5p; 16-5p; 376c-3p; 124-3p; 30a-5p; 9-3p; 451a; 125a-5p; 195-5p; 203a-3p; 143-3p; hsa-let-7a-5p; 148a-3p; 30c-5p; 31-3p; 132-3p; 15a-5p; 139-5p; 1-3p; 7-5p; 204-5p; 27a-3p; 494-3p; 369-3p; 21-5p; 340-5p; 125b-5p; 126-3p                                                                                                                |
| 27 | glioma                                  | 9.39666E-07 | 48 | 17-5p; 20a-5p; 155-5p; 19a-3p; hsa-let-7c-5p; 142-5p; 93-5p; 200c-3p; 497-5p; 106b-5p; 15b-5p; 486-5p; 425-5p; 16-5p; 376a-3p; 376c-3p; 124-3p; 9-3p; 451a; 125a-5p; 195-5p; 203a-3p; 128-3p; 143-3p; hsa-let-7a-5p; 543; 21-3p; 132-3p; 625-5p; 95-3p; 26a-5p; 106a-5p; 139-5p; 1-3p; 378a-3p; 7-5p; 27a-3p; 494-3p; hsa-let-7b-5p; 21-5p; 20b-5p; 340-5p; 23b-3p; 28-3p; 211-5p; 145-5p; 125b-5p; 126-3p      |
| 28 | chemokine signaling pathway             | 1.12757E-06 | 24 | 155-5p; 200c-3p; 497-5p; 146a-5p; 124-3p; 9-3p; 451a; 125a-5p; 195-5p; 203a-3p; 143-3p; hsa-let-7a-5p; 135a-5p; 148a-3p; 409-5p; 139-5p; 1-3p; 7-5p; 138-5p; 127-3p; 27a-3p; 494-3p; 23b-3p; 126-3p                                                                                                                                                                                                             |
| 29 | cell cycle                              | 1.38212E-06 | 48 | 92a-3p; 17-5p; 182-5p; 20a-5p; 155-5p; 18a-5p; 92a-1-5p; 93-5p; 200c-3p; 497-5p; 146a-5p; 106b-5p; 15b-5p; 425-5p; 16-5p; 192-5p; 376c-3p; 628-3p; 30a-5p; 451a; 125a-5p; 195-5p; 203a-3p; hsa-let-7a-5p; 423-5p; 148a-3p; 98-5p; 149-5p; 409-5p; 15a-5p; 95-3p; 26a-5p; 106a-5p; 323a-3p; 1-3p; 144-5p; 378a-3p; 590-5p; 885-5p; 27a-3p; 494-3p; hsa-let-7b-5p; 21-5p; 30a-3p; 340-5p; 23b-3p; 145-5p; 125b-5p |
| 30 | apoptosis                               | 1.38232E-06 | 23 | 17-5p; 155-5p; 96-5p; 19a-3p; 92a-1-5p; 146a-5p; 106b-5p; 30d-5p; 376c-3p; 30a-5p; 451a; 125a-5p; 203a-3p; 143-3p; 30c-5p; 106a-5p; 139-5p; 7-5p; 204-5p; 494-3p; 21-5p; 125b-5p; 126-3p                                                                                                                                                                                                                        |
| 31 | non-small cell lung cancer              | 1.38232E-06 | 40 | 155-5p; 96-5p; 19a-3p; 142-5p; 744-5p; 93-5p; 200c-3p; 497-5p; 146a-5p; 15b-5p; 16-5p; 376c-3p; 124-3p; 9-3p; 451a; 125a-5p; 195-5p; 203a-3p; 128-3p; 143-3p; hsa-let-7a-5p; 30c-5p; 132-3p; 15a-5p; 26a-5p; 106a-5p; 1-3p; 378a-3p; 590-5p; 7-5p; 27a-3p; 494-3p; hsa-let-7b-5p; 21-5p; 20b-5p; 23b-3p; 28-3p; 145-5p; 125b-5p; 126-3p                                                                         |
| 32 | endometrial cancer                      | 1.52526E-06 | 39 | 182-5p; 155-5p; 96-5p; 1246; 19a-3p; 142-5p; 92a-1-5p; 744-5p; 200c-3p; 497-5p; 146a-5p; 15b-5p; 25-3p; 425-5p; 30a-5p; 9-3p; 451a; 125a-5p; 195-5p; 203a-3p; 128-3p; 143-3p; hsa-let-7a-5p; 135a-5p; 543; 487b-3p; 30c-5p; 132-3p; 15a-5p; 106a-5p; 378a-3p; 7-5p; 138-5p; 27a-3p; 494-3p; 21-5p; 145-5p; 125b-5p; 126-3p                                                                                      |
| 33 | small cell lung cancer                  | 4.4107E-06  | 37 | 17-5p; 20a-5p; 155-5p; 19a-3p; 200c-3p; 497-5p; 146a-5p; 15b-5p; 486-5p; 425-5p; 16-5p; 124-3p; 9-3p; 451a; 125a-5p; 195-5p; 203a-3p; 143-3p; 135a-5p; 148a-3p; 98-5p; 15a-5p; 26a-5p; 106a-5p; 139-5p; 144-5p; 378a-3p; 7-5p; 138-5p; 494-3p; 21-5p; 20b-5p; 153-3p; 23b-3p; 28-3p; 125b-5p; 126-3p                                                                                                            |

### MiRPathDB Reactome

| No | subcategory                                  | q-value     | number of miRs observed | hsa-miRs                                                                                                                                                                                                                                                                                                                                                                                                                                                                                                     |
|----|----------------------------------------------|-------------|-------------------------|--------------------------------------------------------------------------------------------------------------------------------------------------------------------------------------------------------------------------------------------------------------------------------------------------------------------------------------------------------------------------------------------------------------------------------------------------------------------------------------------------------------|
| 1  | signal transduction                          | 1.32716E-17 | 62                      | 17-5p; 182-5p; 20a-5p; 155-5p; 96-5p; 19a-3p; 744-5p; 93-5p; 200c-3p; 19b-3p; 497-5p; 146a-5p; 106b-5p; 15b-5p; 130b-3p; 9-5p; 16-5p; 376c-3p; 628-3p; 124-3p; 30a-5p; 410-3p; 9-3p; 31-5p; 451a; 125a-5p; 195-5p; 203a-3p; 218-5p; 135a-5p; 487b-3p; 148a-3p; 30c-5p; 31-3p; 132-3p; 130a-3p; 98-5p; 149-5p; 15a-5p; 194-5p; 26a-5p; 296-5p; 139-5p; 323a-3p; 423-3p; 1-3p; 144-5p; 33b-5p; 378a-3p; 138-5p; 27b-3p; 204-5p; 27a-3p; 494-3p; 21-5p; 30a-3p; 99b-3p; 454-3p; 23b-3p; 145-5p; 125b-5p; 126-3p |
| 2  | intracellular signaling by second messengers | 1.04511E-14 | 55                      | 92a-3p; 17-5p; 182-5p; 20a-5p; 155-5p; 96-5p; 19a-3p; 92a-1-5p; 744-5p; 93-5p; 200c-3p; 19b-3p; 582-5p; 146a-5p; 106b-5p; 15b-5p; 130b-3p; 16-5p; 30d-5p; 376c-3p; 628-3p; 30a-5p; 186-5p; 9-3p; 125a-5p; 195-5p; 203a-3p; 143-3p; 135a-5p; 148a-3p; 30c-5p; 30b-5p; 99a-5p; 101-5p; 31-3p; 132-3p; 130a-3p; 382-3p; 15a-5p; 194-5p; 433-3p; 26a-5p; 106a-5p; 139-5p; 323a-3p; 423-3p; 378a-3p; 138-5p; 494-3p; 21-5p; 20b-5p; 454-3p; 23b-3p; 145-5p; 126-3p                                                |



|    |                                                            |             |    |                                                                                                                                                                                                                                                                                                                                                                                                                                                                                                                                                                                                                                                                                                                                                       |
|----|------------------------------------------------------------|-------------|----|-------------------------------------------------------------------------------------------------------------------------------------------------------------------------------------------------------------------------------------------------------------------------------------------------------------------------------------------------------------------------------------------------------------------------------------------------------------------------------------------------------------------------------------------------------------------------------------------------------------------------------------------------------------------------------------------------------------------------------------------------------|
| 3  | PIP3 activates AKT signaling                               | 4.32689E-14 | 54 | 92a-3p; 17-5p; 182-5p; 20a-5p; 155-5p; 19a-3p; 744-5p; 93-5p; 200c-3p; 19b-3p; 582-5p; 146a-5p; 106b-5p; 15b-5p; 130b-3p; 425-5p; 16-5p; 30d-5p; 376c-3p; 628-3p; 30a-5p; 186-5p; 9-3p; 125a-5p; 195-5p; 203a-3p; 143-3p; 135a-5p; 148a-3p; 30c-5p; 30b-5p; 99a-5p; 101-5p; 31-3p; 132-3p; 484; 130a-3p; 15a-5p; 194-5p; 433-3p; 26a-5p; 106a-5p; 139-5p; 423-3p; 378a-3p; 138-5p; 27a-3p; 494-3p; 21-5p; 20b-5p; 454-3p; 145-5p; 125b-5p; 126-3p                                                                                                                                                                                                                                                                                                     |
| 4  | generic transcription pathway                              | 3.46932E-12 | 84 | 92a-3p; 17-5p; 182-5p; 20a-5p; 155-5p; 96-5p; 18a-5p; 19a-3p; hsa-let-7c-5p; 17-3p; hsa-let-7e-5p; 92a-1-5p; 744-5p; 93-5p; 200c-3p; 19b-3p; 497-5p; 146a-5p; 766-3p; 181c-5p; 106b-5p; 15b-5p; 130b-3p; 425-5p; 16-5p; 154-5p; 376a-3p; 376c-3p; 628-3p; 30a-5p; 186-5p; 31-5p; 491-5p; 125a-5p; 195-5p; 203a-3p; 143-3p; hsa-let-7a-5p; 135a-5p; 543; 485-3p; 487b-3p; 148a-3p; 21-3p; 30c-5p; 30b-5p; 654-3p; 101-5p; 484; 130a-3p; 134-5p; 98-5p; 149-5p; 382-3p; 15a-5p; 194-5p; 26a-5p; 106a-5p; 323a-3p; 423-3p; 425-3p; 320c; 144-5p; 33b-5p; 378a-3p; 629-5p; 590-5p; 138-5p; 27b-3p; 27a-3p; 494-3p; 376b-3p; hsa-let-7b-5p; 21-5p; 20b-5p; 30a-3p; 454-3p; 23b-3p; 331-5p; 145-5p; 504-5p; 125b-5p; 126-3p; 770-5p                         |
| 5  | gene expression transcription                              | 6.46613E-12 | 88 | 92a-3p; 17-5p; 182-5p; 20a-5p; 155-5p; 96-5p; 18a-5p; 1246; 19a-3p; hsa-let-7c-5p; 17-3p; 183-5p; hsa-let-7e-5p; 92a-1-5p; 744-5p; 93-5p; 200c-3p; 19b-3p; 497-5p; 146a-5p; 766-3p; 181c-5p; 106b-5p; 15b-5p; 130b-3p; 425-5p; 16-5p; 154-5p; 30d-5p; 376a-3p; 628-3p; 30a-5p; 410-3p; 186-5p; 127-5p; 31-5p; 491-5p; 125a-5p; 195-5p; 203a-3p; 143-3p; hsa-let-7a-5p; 218-5p; 543; 485-3p; 148a-3p; 21-3p; 30c-5p; 30b-5p; 101-5p; 31-3p; 484; 130a-3p; 134-5p; 98-5p; 149-5p; 382-3p; 15a-5p; 194-5p; 26a-5p; 106a-5p; 323a-3p; 423-3p; 425-3p; 320c; 1-3p; 144-5p; 33b-5p; 378a-3p; 629-5p; 590-5p; 138-5p; 27b-3p; 27a-3p; 494-3p; 376b-3p; hsa-let-7b-5p; 21-5p; 20b-5p; 30a-3p; 454-3p; 23b-3p; 331-5p; 145-5p; 504-5p; 125b-5p; 126-3p; 770-5p |
| 6  | signaling by TGF-beta receptor complex                     | 2.66736E-11 | 37 | 17-5p; 20a-5p; 18a-5p; 19a-3p; 92a-1-5p; 93-5p; 200c-3p; 19b-3p; 497-5p; 146a-5p; 106b-5p; 15b-5p; 130b-3p; 16-5p; 154-5p; 376c-3p; 31-5p; 125a-5p; 195-5p; 148a-3p; 30c-5p; 99a-5p; 484; 130a-3p; 98-5p; 15a-5p; 323a-3p; 144-5p; 629-5p; 590-5p; 27b-3p; 27a-3p; 369-3p; 21-5p; 454-3p; 23b-3p; 145-5p                                                                                                                                                                                                                                                                                                                                                                                                                                              |
| 7  | PTEN regulation                                            | 6.42009E-11 | 37 | 92a-3p; 17-5p; 20a-5p; 19a-3p; 92a-1-5p; 744-5p; 93-5p; 200c-3p; 19b-3p; 106b-5p; 130b-3p; 16-5p; 628-3p; 186-5p; 9-3p; 451a; 143-3p; 487b-3p; 148a-3p; 30c-5p; 30b-5p; 99a-5p; 484; 130a-3p; 382-3p; 15a-5p; 26a-5p; 106a-5p; 423-3p; 378a-3p; 138-5p; 494-3p; 21-5p; 20b-5p; 454-3p; 92b-5p; 126-3p                                                                                                                                                                                                                                                                                                                                                                                                                                                 |
| 8  | vesicle-mediated transport                                 | 1.02977E-10 | 29 | 92a-3p; 17-5p; 20a-5p; 155-5p; 19a-3p; 93-5p; 106b-5p; 15b-5p; 130b-3p; 99a-3p; 16-5p; 124-3p; 30a-5p; 186-5p; 299-5p; 451a; 195-5p; 148a-3p; 30c-5p; 130a-3p; 149-5p; 382-3p; 15a-5p; 1-3p; 132-5p; 432-5p; 20b-5p; 99b-3p; 1296-5p                                                                                                                                                                                                                                                                                                                                                                                                                                                                                                                  |
| 9  | RNA polymerase II transcription                            | 1.77504E-10 | 82 | 92a-3p; 17-5p; 182-5p; 20a-5p; 155-5p; 96-5p; 18a-5p; 19a-3p; hsa-let-7c-5p; 17-3p; 183-5p; hsa-let-7e-5p; 92a-1-5p; 744-5p; 93-5p; 200c-3p; 19b-3p; 497-5p; 146a-5p; 766-3p; 181c-5p; 106b-5p; 15b-5p; 130b-3p; 425-5p; 16-5p; 154-5p; 376a-3p; 376c-3p; 628-3p; 30a-5p; 410-3p; 186-5p; 31-5p; 491-5p; 125a-5p; 195-5p; 203a-3p; 143-3p; hsa-let-7a-5p; 135a-5p; 543; 485-3p; 148a-3p; 21-3p; 30c-5p; 30b-5p; 654-3p; 101-5p; 484; 130a-3p; 134-5p; 98-5p; 149-5p; 15a-5p; 26a-5p; 106a-5p; 323a-3p; 423-3p; 320c; 1-3p; 144-5p; 33b-5p; 378a-3p; 629-5p; 590-5p; 138-5p; 27b-3p; 27a-3p; 494-3p; 376b-3p; hsa-let-7b-5p; 21-5p; 20b-5p; 30a-3p; 454-3p; 23b-3p; 145-5p; 504-5p; 125b-5p; 126-3p; 770-5p                                            |
| 10 | transcriptional activity of SMAD2 SMAD3 SMAD4 heterotrimer | 1.83271E-10 | 33 | 17-5p; 20a-5p; 18a-5p; 19a-3p; 92a-1-5p; 15b-5p; 130b-3p; 16-5p; 376c-3p; 31-5p; 125a-5p; 195-5p; 148a-3p; 30c-5p; 30b-5p; 99a-5p; 484; 130a-3p; 98-5p; 15a-5p; 129-2-3p; 323a-3p; 144-5p; 378a-3p; 629-5p; 590-5p; 27b-3p; 27a-3p; 369-3p; 21-5p; 454-3p; 23b-3p; 145-5p                                                                                                                                                                                                                                                                                                                                                                                                                                                                             |
| 11 | signaling by TGF-beta family members                       | 2.82943E-10 | 37 | 92a-3p; 17-5p; 20a-5p; 155-5p; 18a-5p; 19a-3p; 93-5p; 200c-3p; 19b-3p; 497-5p; 106b-5p; 15b-5p; 16-5p; 154-5p; 376c-3p; 31-5p; 195-5p; 203a-3p; 135a-5p; 148a-3p; 29b-1-5p; 99a-5p; 31-3p; 130a-3p; 15a-5p; 323a-3p; 144-5p; 629-5p; 590-5p; 27b-3p; 27a-3p; 369-3p; 21-5p; 20b-5p; 454-3p; 23b-3p; 145-5p                                                                                                                                                                                                                                                                                                                                                                                                                                            |
| 12 | immune system                                              | 3.9251E-10  | 41 | 17-5p; 20a-5p; 155-5p; 96-5p; 18a-5p; 19a-3p; 17-3p; 93-5p; 200c-3p; 582-5p; 497-5p; 146a-5p; 106b-5p; 15b-5p; 16-5p; 30a-5p; 9-3p; 451a; 125a-5p; 195-5p; 203a-3p; 143-3p; 218-5p; 543; 148a-3p; 30c-5p; 31-3p; 132-3p; 130a-3p; 98-5p; 15a-5p; 95-3p; 139-5p; 423-3p; 1-3p; 21-5p; 23b-3p; 145-5p; 125b-5p; 126-3p; 1296-5p                                                                                                                                                                                                                                                                                                                                                                                                                         |

|    |                                            |             |    |                                                                                                                                                                                                                                                                                                                                                                                                                                                                           |
|----|--------------------------------------------|-------------|----|---------------------------------------------------------------------------------------------------------------------------------------------------------------------------------------------------------------------------------------------------------------------------------------------------------------------------------------------------------------------------------------------------------------------------------------------------------------------------|
| 13 | transcriptional regulation by TP53         | 5.53929E-10 | 47 | 92a-3p; 17-5p; 182-5p; 20a-5p; 155-5p; 96-5p; 19a-3p; hsa-let-7c-5p; 17-3p; hsa-let-7e-5p; 92a-1-5p; 744-5p; 93-5p; 200c-3p; 19b-3p; 497-5p; 106b-5p; 15b-5p; 130b-3p; 16-5p; 628-3p; 30a-5p; 186-5p; 625-3p; 125a-5p; 195-5p; hsa-let-7a-5p; 148a-3p; 99a-5p; 484; 130a-3p; 149-5p; 382-3p; 15a-5p; 26a-5p; 106a-5p; 323a-3p; 423-3p; 494-3p; hsa-let-7b-5p; 21-5p; 20b-5p; 30a-3p; 454-3p; 23b-3p; 504-5p; 125b-5p                                                      |
| 14 | cellular senescence                        | 1.00738E-09 | 54 | 17-5p; 20a-5p; 155-5p; hsa-let-7c-5p; hsa-let-7e-5p; 744-5p; 93-5p; 200c-3p; 497-5p; 146a-5p; 181c-5p; 106b-5p; 15b-5p; 130b-3p; 16-5p; 30d-5p; 376c-3p; 124-3p; 186-5p; 9-3p; 299-5p; 31-5p; 451a; 125a-5p; 195-5p; 203a-3p; hsa-let-7a-5p; 218-5p; 423-5p; 543; 487b-3p; 148a-3p; 30c-5p; 30b-5p; 654-3p; 130a-3p; 98-5p; 15a-5p; 194-5p; 26a-5p; 106a-5p; 323a-3p; 320c; 144-5p; 629-5p; 138-5p; 27a-3p; 494-3p; hsa-let-7b-5p; 21-5p; 20b-5p; 454-3p; 145-5p; 125b-5p |
| 15 | ESR-mediated signaling                     | 1.00738E-09 | 53 | 92a-3p; 17-5p; 182-5p; 155-5p; 96-5p; 19a-3p; hsa-let-7c-5p; 17-3p; 744-5p; 93-5p; 200c-3p; 497-5p; 15b-5p; 130b-3p; 9-5p; 16-5p; 376c-3p; 30a-5p; 186-5p; 299-5p; 31-5p; 451a; 195-5p; 143-3p; hsa-let-7a-5p; 135a-5p; 543; 148a-3p; 656-3p; 30c-5p; 99a-5p; 654-3p; 132-3p; 98-5p; 382-3p; 15a-5p; 194-5p; 26a-5p; 139-5p; 323a-3p; 1-3p; 33b-5p; 378a-3p; 138-5p; 27b-3p; 27a-3p; 494-3p; hsa-let-7b-5p; 21-5p; 30a-3p; 145-5p; 92b-5p; 126-3p                         |
| 16 | disease                                    | 1.09641E-09 | 39 | 92a-3p; 182-5p; 155-5p; 19a-3p; 744-5p; 200c-3p; 15b-5p; 425-5p; 16-5p; 186-5p; 31-5p; 125a-5p; 195-5p; 143-3p; hsa-let-7a-5p; 218-5p; 485-3p; 148a-3p; 30c-5p; 31-3p; 132-3p; 484; 130a-3p; 409-5p; 15a-5p; 26a-5p; 296-5p; 139-5p; 423-3p; 27b-3p; 27a-3p; 494-3p; 30a-3p; 23b-3p; 145-5p; 125b-5p; 126-3p; 92b-3p; 1296-5p                                                                                                                                             |
| 17 | membrane trafficking                       | 1.43308E-09 | 30 | 92a-3p; 17-5p; 20a-5p; 155-5p; 19a-3p; 142-3p; 93-5p; 106b-5p; 15b-5p; 130b-3p; 99a-3p; 16-5p; 124-3p; 30a-5p; 186-5p; 299-5p; 451a; 195-5p; 148a-3p; 30c-5p; 130a-3p; 149-5p; 382-3p; 15a-5p; 1-3p; 132-5p; 432-5p; 20b-5p; 99b-3p; 1296-5p                                                                                                                                                                                                                              |
| 18 | diseases of signal transduction            | 4.21323E-09 | 40 | 92a-3p; 182-5p; 155-5p; 19a-3p; hsa-let-7c-5p; 744-5p; 200c-3p; 19b-3p; 582-5p; 15b-5p; 130b-3p; 425-5p; 376c-3p; 451a; 125a-5p; 195-5p; 143-3p; 218-5p; 135a-5p; 148a-3p; 656-3p; 30c-5p; 144-3p; 31-3p; 132-3p; 130a-3p; 194-5p; 433-3p; 26a-5p; 106a-5p; 139-5p; 323a-3p; 378a-3p; 27a-3p; 21-5p; 30a-3p; 454-3p; 145-5p; 125b-5p; 126-3p                                                                                                                              |
| 19 | interleukin-4 and interleukin-13 signaling | 4.49125E-09 | 42 | 17-5p; 155-5p; 96-5p; 19a-3p; hsa-let-7c-5p; 93-5p; 200c-3p; 582-5p; 497-5p; 146a-5p; 15b-5p; 9-5p; 16-5p; 186-5p; 625-3p; 451a; 125a-5p; 195-5p; 203a-3p; 143-3p; 135a-5p; 148a-3p; 29b-1-5p; 30c-5p; 654-3p; 134-5p; 98-5p; 495-3p; 15a-5p; 95-3p; 26a-5p; 106a-5p; 139-5p; 323a-3p; 33b-5p; 378a-3p; 138-5p; 494-3p; 21-5p; 145-5p; 125b-5p; 126-3p                                                                                                                    |
| 20 | signaling by nuclear receptors             | 5.81788E-09 | 49 | 92a-3p; 17-5p; 182-5p; 155-5p; 19a-3p; hsa-let-7c-5p; 744-5p; 93-5p; 200c-3p; 582-5p; 497-5p; 15b-5p; 9-5p; 16-5p; 376c-3p; 30a-5p; 299-5p; 31-5p; 451a; 195-5p; 143-3p; hsa-let-7a-5p; 135a-5p; 543; 148a-3p; 656-3p; 30c-5p; 99a-5p; 132-3p; 98-5p; 382-3p; 15a-5p; 194-5p; 106a-5p; 139-5p; 320c; 1-3p; 33b-5p; 378a-3p; 138-5p; 27b-3p; 27a-3p; 494-3p; hsa-let-7b-5p; 21-5p; 30a-3p; 145-5p; 92b-5p; 126-3p                                                          |
| 21 | TP53 regulates metabolic genes             | 7.36013E-09 | 34 | 17-5p; 20a-5p; 19a-3p; 17-3p; hsa-let-7e-5p; 744-5p; 93-5p; 497-5p; 106b-5p; 130b-3p; 16-5p; 628-3p; 186-5p; 31-5p; 451a; 143-3p; hsa-let-7a-5p; 148a-3p; 99a-5p; 484; 130a-3p; 382-3p; 26a-5p; 106a-5p; 320c; 409-3p; 494-3p; hsa-let-7b-5p; 21-5p; 20b-5p; 454-3p; 23b-3p; 92b-5p; 126-3p                                                                                                                                                                               |
| 22 | oncogene induced senescence                | 1.07326E-08 | 42 | 17-5p; 20a-5p; 155-5p; 18a-5p; 19a-3p; 93-5p; 200c-3p; 582-5p; 497-5p; 766-3p; 106b-5p; 15b-5p; 130b-3p; 410-3p; 9-3p; 299-5p; 31-5p; 451a; 195-5p; hsa-let-7a-5p; 218-5p; 543; 148a-3p; 30c-5p; 99a-5p; 654-3p; 130a-3p; 149-5p; 382-3p; 15a-5p; 26a-5p; 106a-5p; 378a-3p; 590-5p; 494-3p; hsa-let-7b-5p; 21-5p; 20b-5p; 454-3p; 23b-3p; 145-5p; 125b-5p                                                                                                                 |
| 23 | cytokine signaling in immune system        | 1.42651E-08 | 42 | 155-5p; 96-5p; hsa-let-7c-5p; hsa-let-7e-5p; 200c-3p; 497-5p; 146a-5p; 15b-5p; 16-5p; 124-3p; 186-5p; 9-3p; 451a; 125a-5p; 195-5p; 203a-3p; 143-3p; hsa-let-7a-5p; 218-5p; 135a-5p; 148a-3p; 30c-5p; 132-3p; 98-5p; 15a-5p; 95-3p; 194-5p; 433-3p; 26a-5p; 139-5p; 423-3p; 1-3p; 33b-5p; 378a-3p; 138-5p; 494-3p; 21-5p; 30a-3p; 23b-3p; 145-5p; 125b-5p; 126-3p                                                                                                          |

### MiRPathDB WikiPathways

| No | subcategory | q-value | number of miRs observed | hsa-miRs |
|----|-------------|---------|-------------------------|----------|
|----|-------------|---------|-------------------------|----------|

|   |                                                                 |             |    |                                                                                                                                                                                                                                                                                                                                                                                                                                                                                                                                                                                                                     |
|---|-----------------------------------------------------------------|-------------|----|---------------------------------------------------------------------------------------------------------------------------------------------------------------------------------------------------------------------------------------------------------------------------------------------------------------------------------------------------------------------------------------------------------------------------------------------------------------------------------------------------------------------------------------------------------------------------------------------------------------------|
| 1 | integrated breast cancer pathway                                | 5.03182E-20 | 69 | 92a-3p; 17-5p; 182-5p; 20a-5p; 155-5p; 96-5p; 18a-5p; 19a-3p; hsa-let-7c-5p; 142-5p; 92a-1-5p; 744-5p; 16-2-3p; 93-5p; 200c-3p; 582-5p; 497-5p; 146a-5p; 106b-5p; 15b-5p; 9-5p; 486-5p; 425-5p; 30d-5p; 381-3p; 376c-3p; 30a-5p; 9-3p; 451a; 125a-5p; 203a-3p; 128-3p; 143-3p; hsa-let-7a-5p; 135a-5p; 543; 487b-3p; 148a-3p; 21-3p; 30c-5p; 132-3p; 98-5p; 149-5p; 758-3p; 15a-5p; 26a-5p; 296-5p; 106a-5p; 139-5p; 33b-5p; 18b-5p; 378a-3p; 590-5p; 7-5p; 138-5p; 885-5p; 27b-3p; 204-5p; 27a-3p; 383-5p; 494-3p; 21-5p; 20b-5p; 153-3p; 23b-3p; 145-5p; 370-3p; 99b-5p; 126-3p                                   |
| 2 | TGF-beta Signaling Pathway                                      | 5.03182E-20 | 68 | 17-5p; 20a-5p; 155-5p; 18a-5p; 19a-3p; 19b-1-5p; hsa-let-7c-5p; 142-5p; 92a-1-5p; 93-5p; 200c-3p; 19b-3p; 582-5p; 497-5p; 146a-5p; 106b-5p; 15b-5p; 16-5p; 154-5p; 376c-3p; 628-3p; 30a-5p; 410-3p; 31-5p; 625-3p; 655-3p; 451a; 491-5p; 125a-5p; 195-5p; 203a-3p; 143-3p; hsa-let-7a-5p; 218-5p; 135a-5p; 543; 487b-3p; 148a-3p; 29b-1-5p; 30c-5p; 144-3p; 654-3p; 130a-3p; 15a-5p; 95-3p; 433-3p; 129-2-3p; 106a-5p; 139-5p; 323a-3p; 144-5p; 33b-5p; 378a-3p; 590-5p; 138-5p; 127-3p; 27b-3p; 27a-3p; 494-3p; 369-3p; hsa-let-7b-5p; 21-5p; 20b-5p; 30a-3p; 23b-3p; 145-5p; 370-3p; 126-3p                       |
| 3 | VEGFA-VEGFR2 Signaling Pathway                                  | 8.92E-17    | 63 | 17-5p; 182-5p; 20a-5p; 155-5p; 96-5p; 18a-5p; 19a-3p; hsa-let-7c-5p; 142-5p; 93-5p; 200c-3p; 497-5p; 146a-5p; 106b-5p; 15b-5p; 9-5p; 486-5p; 425-5p; 381-3p; 376c-3p; 124-3p; 30a-5p; 9-3p; 625-3p; 451a; 125a-5p; 195-5p; 203a-3p; 128-3p; 143-3p; 218-5p; 135a-5p; 543; 148a-3p; 378c; 30c-5p; 654-3p; 31-3p; 132-3p; 134-5p; 378i; 15a-5p; 487a-3p; 296-5p; 106a-5p; 139-5p; 1-3p; 144-5p; 33b-5p; 18b-5p; 378a-3p; 138-5p; 409-3p; 204-5p; 27a-3p; 494-3p; 369-3p; 21-5p; 340-5p; 378d; 23b-3p; 145-5p; 126-3p                                                                                                  |
| 4 | DNA damage response only ATM dependent                          | 1.44131E-16 | 73 | 92a-3p; 17-5p; 182-5p; 20a-5p; 155-5p; 96-5p; 18a-5p; 19a-3p; 142-5p; 92a-1-5p; 744-5p; 93-5p; 200c-3p; 19b-3p; 582-5p; 497-5p; 146a-5p; 106b-5p; 15b-5p; 9-5p; 425-5p; 16-5p; 154-5p; 376c-3p; 124-3p; 30a-5p; 451a; 125a-5p; 195-5p; 203a-3p; 143-3p; hsa-let-7a-5p; 218-5p; 4286; 135a-5p; 543; 485-3p; 487b-3p; 148a-3p; 21-3p; 29b-1-5p; 30c-5p; 144-3p; 101-5p; 130a-3p; 98-5p; 409-5p; 15a-5p; 95-3p; 433-3p; 26a-5p; 106a-5p; 139-5p; 323a-3p; 144-5p; 33b-5p; 378a-3p; 590-5p; 7-5p; 138-5p; 127-3p; 885-5p; 27b-3p; 27a-3p; 494-3p; hsa-let-7b-5p; 21-5p; 30a-3p; 340-5p; 153-3p; 145-5p; 125b-5p; 126-3p |
| 5 | chromosomal and microsatellite instability in colorectal cancer | 3.85426E-15 | 63 | 17-5p; 20a-5p; 155-5p; 96-5p; 18a-5p; 1246; 19a-3p; 142-5p; 92a-1-5p; 93-5p; 200c-3p; 582-5p; 497-5p; 146a-5p; 106b-5p; 15b-5p; 425-5p; 16-5p; 381-3p; 30a-5p; 655-3p; 451a; 125a-5p; 195-5p; 203a-3p; 143-3p; hsa-let-7a-5p; 4286; 135a-5p; 487b-3p; 148a-3p; 29b-1-5p; 378c; 30c-5p; 144-3p; 101-5p; 132-3p; 130a-3p; 378i; 15a-5p; 95-3p; 106a-5p; 139-5p; 323a-3p; 423-3p; 33b-5p; 378a-3p; 590-5p; 7-5p; 138-5p; 409-3p; 885-5p; 27a-3p; 494-3p; 21-5p; 20b-5p; 378d; 145-5p; 370-3p; 504-5p; 125b-5p; 126-3p; 323b-3p                                                                                         |
| 6 | epithelial to mesenchymal transition in colorectal cancer       | 3.85426E-15 | 48 | 155-5p; 18a-5p; 19a-3p; 142-5p; 200c-3p; 497-5p; 146a-5p; 15b-5p; 9-5p; 486-5p; 154-5p; 376c-3p; 124-3p; 30a-5p; 410-3p; 9-3p; 625-3p; 451a; 491-5p; 125a-5p; 195-5p; 203a-3p; 128-3p; 143-3p; 543; 487b-3p; 148a-3p; 29b-1-5p; 30c-5p; 144-3p; 132-3p; 378i; 15a-5p; 433-3p; 139-5p; 378a-3p; 590-5p; 7-5p; 138-5p; 27b-3p; 204-5p; 27a-3p; 494-3p; 21-5p; 378d; 145-5p; 125b-5p; 126-3p                                                                                                                                                                                                                           |
| 7 | hepatitis C and hepatocellular carcinoma                        | 3.85426E-15 | 54 | 17-5p; 20a-5p; 155-5p; 18a-5p; 19a-3p; hsa-let-7c-5p; 142-5p; 93-5p; 582-5p; 497-5p; 146a-5p; 106b-5p; 15b-5p; 425-5p; 16-5p; 30d-5p; 124-3p; 30a-5p; 299-5p; 625-3p; 451a; 125a-5p; 195-5p; 203a-3p; 128-3p; 143-3p; hsa-let-7a-5p; 218-5p; 135a-5p; 148a-3p; 21-3p; 29b-1-5p; 30c-5p; 144-3p; 98-5p; 15a-5p; 95-3p; 433-3p; 26a-5p; 106a-5p; 323a-3p; 378a-3p; 590-5p; 138-5p; 885-5p; 27a-3p; 494-3p; hsa-let-7b-5p; 21-5p; 20b-5p; 28-3p; 145-5p; 125b-5p; 126-3p                                                                                                                                               |
| 8 | TGF-beta Receptor Signaling                                     | 9.75275E-15 | 42 | 17-5p; 20a-5p; 155-5p; 19a-3p; 93-5p; 200c-3p; 19b-3p; 582-5p; 497-5p; 146a-5p; 106b-5p; 15b-5p; 486-5p; 154-5p; 376c-3p; 628-3p; 125a-5p; 203a-3p; 143-3p; hsa-let-7a-5p; 135a-5p; 543; 148a-3p; 29b-1-5p; 30c-5p; 144-3p; 130a-3p; 15a-5p; 106a-5p; 139-5p; 323a-3p; 144-5p; 590-5p; 138-5p; 27b-3p; 27a-3p; 21-5p; 20b-5p; 30a-3p; 145-5p; 370-3p; 125b-5p                                                                                                                                                                                                                                                       |
| 9 | leptin signaling pathway                                        | 1.35016E-14 | 54 | 106b-3p; 182-5p; 155-5p; 19a-3p; hsa-let-7c-5p; 142-5p; 200c-3p; 582-5p; 497-5p; 146a-5p; 15b-5p; 9-5p; 486-5p; 425-5p; 16-5p; 124-3p; 30a-5p; 9-3p; 625-3p; 451a; 125a-5p; 195-5p; 203a-3p; 128-3p; 143-3p; hsa-let-7a-5p; 135a-5p; 543; 148a-3p; 21-3p; 378c; 30c-5p; 329-3p; 378i; 15a-5p; 487a-3p; 433-3p; 106a-5p; 139-5p; 144-5p; 33b-5p; 378a-3p; 7-5p; 138-5p; 204-5p; 27a-3p; 494-3p; 369-3p; 21-5p; 378d; 23b-3p; 145-5p; 125b-5p; 126-3p                                                                                                                                                                 |

|    |                                                             |             |    |                                                                                                                                                                                                                                                                                                                                                                                                                                                                                   |
|----|-------------------------------------------------------------|-------------|----|-----------------------------------------------------------------------------------------------------------------------------------------------------------------------------------------------------------------------------------------------------------------------------------------------------------------------------------------------------------------------------------------------------------------------------------------------------------------------------------|
| 10 | extracellular vesicle-mediated signaling in recipient cells | 2.11888E-14 | 42 | 155-5p; 18a-5p; 19a-3p; 142-5p; 744-5p; 497-5p; 146a-5p; 425-5p; 16-5p; 154-5p; 376c-3p; 30a-5p; 491-5p; 125a-5p; 128-3p; 143-3p; hsa-let-7a-5p; 218-5p; 135a-5p; 543; 487b-3p; 148a-3p; 29b-1-5p; 378c; 144-3p; 132-3p; 130a-3p; 378i; 433-3p; 26a-5p; 139-5p; 323a-3p; 144-5p; 590-5p; 409-3p; 27b-3p; 27a-3p; 21-5p; 378d; 145-5p; 125b-5p; 126-3p                                                                                                                             |
| 11 | RAC1 PAK1 p38 MMP2 pathway                                  | 2.57742E-14 | 45 | 106b-3p; 155-5p; 96-5p; 19a-3p; 142-5p; 92a-1-5p; 200c-3p; 497-5p; 146a-5p; 124-3p; 9-3p; 625-3p; 451a; 125a-5p; 203a-3p; 143-3p; hsa-let-7a-5p; 135a-5p; 543; 487b-3p; 148a-3p; 30c-5p; 132-3p; 134-5p; 15a-5p; 487a-3p; 433-3p; 106a-5p; 139-5p; 323a-3p; 33b-5p; 378a-3p; 7-5p; 138-5p; 885-5p; 27a-3p; 494-3p; 21-5p; 30a-3p; 23b-3p; 28-3p; 145-5p; 370-3p; 125b-5p; 126-3p                                                                                                  |
| 12 | bladder cancer                                              | 6.04679E-14 | 54 | 17-5p; 20a-5p; 155-5p; 96-5p; 19a-3p; hsa-let-7c-5p; 142-5p; 92a-1-5p; 16-2-3p; 93-5p; 497-5p; 146a-5p; 106b-5p; 15b-5p; 130b-3p; 25-3p; 486-5p; 425-5p; 16-5p; 376c-3p; 30a-5p; 9-3p; 451a; 491-5p; 125a-5p; 195-5p; 203a-3p; 143-3p; hsa-let-7a-5p; 135a-5p; 543; 487b-3p; 148a-3p; 30c-5p; 132-3p; 130a-3p; 134-5p; 98-5p; 487a-3p; 95-3p; 106a-5p; 1-3p; 33b-5p; 18b-5p; 378a-3p; 138-5p; 27a-3p; 494-3p; 21-5p; 20b-5p; 30a-3p; 23b-3p; 145-5p; 125b-5p; 126-3p              |
| 13 | EGF EGFR signaling pathway                                  | 1.5309E-13  | 50 | 106b-3p; 17-5p; 182-5p; 20a-5p; 155-5p; 18a-5p; 19a-3p; 142-5p; 744-5p; 93-5p; 200c-3p; 497-5p; 146a-5p; 181c-5p; 106b-5p; 15b-5p; 486-5p; 376c-3p; 124-3p; 30a-5p; 9-3p; 451a; 125a-5p; 203a-3p; 128-3p; 143-3p; 135a-5p; 543; 148a-3p; 30c-5p; 99a-5p; 654-3p; 31-3p; 132-3p; 433-3p; 106a-5p; 139-5p; 33b-5p; 181d-5p; 378a-3p; 138-5p; 27a-3p; 494-3p; 21-5p; 20b-5p; 153-3p; 23b-3p; 145-5p; 125b-5p; 126-3p                                                                 |
| 14 | pancreatic adenocarcinoma pathway                           | 1.54919E-13 | 58 | 17-5p; 20a-5p; 155-5p; 96-5p; 18a-5p; 19a-3p; 142-5p; 92a-1-5p; 744-5p; 200c-3p; 582-5p; 497-5p; 146a-5p; 106b-5p; 15b-5p; 486-5p; 16-5p; 124-3p; 30a-5p; 9-3p; 625-3p; 451a; 491-5p; 125a-5p; 195-5p; 203a-3p; 128-3p; 143-3p; hsa-let-7a-5p; 148a-3p; 21-3p; 29b-1-5p; 378c; 30c-5p; 654-3p; 132-3p; 134-5p; 378i; 15a-5p; 95-3p; 106a-5p; 323a-3p; 378a-3p; 590-5p; 7-5p; 138-5p; 27a-3p; 494-3p; 369-3p; 21-5p; 20b-5p; 378d; 23b-3p; 145-5p; 370-3p; 504-5p; 125b-5p; 126-3p |
| 15 | IL-5 signaling pathway                                      | 1.64454E-13 | 40 | 182-5p; 155-5p; 96-5p; 19a-3p; 744-5p; 200c-3p; 497-5p; 146a-5p; 15b-5p; 425-5p; 16-5p; 376c-3p; 9-3p; 451a; 125a-5p; 195-5p; 203a-3p; 143-3p; hsa-let-7a-5p; 135a-5p; 487b-3p; 148a-3p; 30c-5p; 15a-5p; 487a-3p; 433-3p; 139-5p; 323a-3p; 33b-5p; 378a-3p; 7-5p; 124-5p; 27a-3p; 494-3p; 21-5p; 99b-3p; 23b-3p; 145-5p; 125b-5p; 126-3p                                                                                                                                          |
| 16 | viral acute myocarditis                                     | 1.06889E-12 | 36 | 155-5p; 96-5p; 19a-3p; hsa-let-7c-5p; 744-5p; 582-5p; 146a-5p; 106b-5p; 15b-5p; 9-5p; 30a-5p; 9-3p; 451a; 125a-5p; 203a-3p; 143-3p; hsa-let-7a-5p; 148a-3p; 21-3p; 29b-1-5p; 132-3p; 487a-3p; 194-5p; 26a-5p; 106a-5p; 139-5p; 33b-5p; 138-5p; 409-3p; 885-5p; 204-5p; 494-3p; 21-5p; 125b-5p; 126-3p; 323b-3p                                                                                                                                                                    |
| 17 | oncostatin M signaling pathway                              | 2.56324E-12 | 46 | 17-5p; 155-5p; 19a-3p; 142-5p; 200c-3p; 497-5p; 146a-5p; 16-5p; 30d-5p; 381-3p; 124-3p; 30a-5p; 9-3p; 299-5p; 625-3p; 451a; 125a-5p; 203a-3p; 128-3p; 143-3p; 4286; 148a-3p; 29b-1-5p; 30c-5p; 30b-5p; 132-3p; 134-5p; 487a-3p; 433-3p; 106a-5p; 139-5p; 33b-5p; 378a-3p; 7-5p; 138-5p; 27b-3p; 27a-3p; 494-3p; 21-5p; 20b-5p; 23b-3p; 28-3p; 145-5p; 504-5p; 125b-5p; 126-3p                                                                                                     |

\*p-value after the Benjamini-Hochberg adjustment
