# Supplementary material for: A Set of 17 microRNAs Common for Brain and Cerebrospinal Fluid Differentiates Primary Central Nervous System Lymphoma from Non-Malignant Brain Tumors
Source: MDPI journal article supplement (doi:10.3390/biom11091395), 2021-09-21
Supplement: s1 [file s1]

Supplementary Table S11

Top genes strongly associated with the CNS DLBCL-specific miRNA set.

| <b>Target genes (miRTarBase)</b> |                   |                 |                                |                                                                              |                                                                                                                                                                                                                                             |
|----------------------------------|-------------------|-----------------|--------------------------------|------------------------------------------------------------------------------|---------------------------------------------------------------------------------------------------------------------------------------------------------------------------------------------------------------------------------------------|
| <b>CSF miRNAs</b>                |                   |                 |                                |                                                                              |                                                                                                                                                                                                                                             |
| <b>No</b>                        | <b>GENES</b>      | <b>q-value*</b> | <b>number of miRs observed</b> | <b>hsa-miRs</b>                                                              | <b>Biological processes/Molecular function</b>                                                                                                                                                                                              |
| 1                                | <i>MCM3AP-AS1</i> | 9.97443E-08     | 5                              | 19a-3p; 16-5p; 15a-5p; 19b-3p; 15b-5p                                        | lncRNA                                                                                                                                                                                                                                      |
| 2                                | <i>SLC9A6</i>     | 9.97443E-08     | 6                              | 19a-3p; 16-5p; 15a-5p; 19b-3p; 21-5p; 15b-5p                                 | Ion transport. regulation of neurotrophin TRK receptor and brain-derived neurotrophic factor receptor signaling pathway. synapse organization                                                                                               |
| 3                                | <i>TFB1M</i>      | 9.97443E-08     | 5                              | 19a-3p; 16-5p; 15a-5p; 19b-3p; 15b-5p                                        | mitochondrial methyltransferase. rRNA modification. mitochondrion organization                                                                                                                                                              |
| 4                                | <i>ITPR1</i>      | 1.34207E-07     | 7                              | 19a-3p; 16-5p; 15a-5p; 19b-3p; 15b-5p; 92a-3p; 25-3p                         | Ion transport. inositol phosphate-mediated signaling. apoptotic process. response to hypoxia                                                                                                                                                |
| 5                                | <i>C2orf42</i>    | 1.95905E-07     | 5                              | 19a-3p; 16-5p; 15a-5p; 19b-3p; 15b-5p                                        | lncRNA                                                                                                                                                                                                                                      |
| 6                                | <i>RCOR1</i>      | 1.95905E-07     | 8                              | 19a-3p; 16-5p; 15a-5p; 19b-3p; 9-3p; 15b-5p; 25-3p; 26a-5p                   | neural cell differentiation. negative regulation of transcription. DNA-templated. histone H4 deacetylation                                                                                                                                  |
| 7                                | <i>DICER1</i>     | 2.00163E-07     | 9                              | 19a-3p; 16-5p; 148a-3p; 15a-5p; 19b-3p; 221-3p; 21-5p; 15b-5p; 9-5p          | RNA-induced silencing complex (RISC) - regulation of transcription. NIK/NF-kappaB signaling. nerve development. positive regulation of myelination. negative regulation of TNF production                                                   |
| 8                                | <i>NFKB1</i>      | 3.76805E-07     | 6                              | 16-5p; 15a-5p; 21-5p; 9-3p; 92a-3p; 9-5p                                     | proliferation and survival of normal and pathological B cells. negative regulation of transcription. apoptotic process. stress-activated MAPK cascade and positive regulation of canonical Wnt signaling pathway                            |
| 9                                | <i>GIT2</i>       | 6.50888E-07     | 5                              | 19a-3p; 19b-3p; 210-3p; 92a-3p; 26a-5p                                       | GTPase-activating protein. regulation of G protein-coupled receptor signaling pathway                                                                                                                                                       |
| 10                               | <i>PTEN</i>       | 6.50888E-07     | 10                             | 19a-3p; 19b-3p; 221-3p; 21-5p; 17-3p; 92a-3p; 106b-3p; 25-3p; 20a-5p; 26a-5p | PI3K-AKT-mTOR. regulation of ERK1 and ERK2 cascade. Wnt signaling pathway. regulation of B cell apoptotic process. neuron-neuron synaptic transmission; CNS development. myelin maintenance; cell migration. proliferation. differentiation |
| 11                               | <i>DENND6A</i>    | 1.78784E-06     | 7                              | 19a-3p; 16-5p; 15a-5p; 19b-3p; 15b-5p; 210-3p; 92a-3p                        | endocytic recycling pathway. positive regulation of cell-cell adhesion mediated by cadherin                                                                                                                                                 |
| 12                               | <i>DDX3Y</i>      | 0.000001846     | 6                              | 19a-3p; 16-5p; 15a-5p; 19b-3p; 221-3p; 15b-5p                                | cell differentiation. cellular growth and division. alteration of RNA secondary structure: embryogenesis. spermatogenesis                                                                                                                   |
| 13                               | <i>RASA1</i>      | 0.000001846     | 5                              | 19a-3p; 19b-3p; 21-5p; 92a-3p; 26a-5p                                        | RAS/MAPK signaling pathway. negative regulation of cell-matrix adhesion. negative regulation of (neuron) apoptotic process. regulation of GTPase activity                                                                                   |
| 14                               | <i>ARCN1</i>      | 2.27629E-06     | 6                              | 16-5p; 15a-5p; 15b-5p; 92a-3p; 20a-5p; 26a-5p                                | vesicle structure or vesicle trafficking.                                                                                                                                                                                                   |
| 15                               | <i>RASSF5</i>     | 2.56697E-06     | 5                              | 19a-3p; 16-5p; 15a-5p; 19b-3p; 15b-5p                                        | tumor suppressor. lymphocyte adhesion. negative regulation of cell population proliferation. positive regulation of protein ubiquitination. apoptotic process                                                                               |
| 16                               | <i>POU2AF1</i>    | 2.8472E-06      | 4                              | 16-5p; 15a-5p; 15b-5p; 210-3p                                                | response of B-cells to antigens. formation of germinal centers (GC B cell differentiation). positive regulation of interleukin-6 production. positive regulation of transcription by RNA polymerase II                                      |
| 17                               | <i>BTBD7</i>      | 4.07289E-06     | 6                              | 19a-3p; 19b-3p; 21-5p; 92a-3p; 25-3p; 20a-5p                                 | reducing cell-cell adhesion                                                                                                                                                                                                                 |

|    |               |             |   |                                                                     |                                                                                                                             |
|----|---------------|-------------|---|---------------------------------------------------------------------|-----------------------------------------------------------------------------------------------------------------------------|
| 18 | <i>MAP2K3</i> | 5.33787E-06 | 7 | 19a-3p; 16-5p; 15a-5p; 19b-3p; 21-5p; 15b-5p; 20a-5p                | MAP kinase-mediated signaling cascade (proliferation. differentiation. transcription regulation and development)            |
| 19 | <i>SMAD7</i>  | 5.33787E-06 | 7 | 16-5p; 15a-5p; 21-5p; 15b-5p; 92a-3p; 25-3p; 20a-5p                 | TGFBR1 degradation                                                                                                          |
| 20 | <i>CHEK1</i>  | 5.85529E-06 | 7 | 19a-3p; 16-5p; 15a-5p; 19b-3p; 15b-5p; 92a-3p; 26a-5p               | inhibition of DNA damage detection and repair                                                                               |
| 21 | <i>DDX3X</i>  | 6.03052E-06 | 9 | 19a-3p; 16-5p; 15a-5p; 19b-3p; 21-5p; 15b-5p; 92a-3p; 25-3p; 26a-5p | NFKB signaling pathway                                                                                                      |
| 22 | <i>SLC9A1</i> | 6.23677E-06 | 6 | 19a-3p; 16-5p; 15a-5p; 19b-3p; 15b-5p; 92a-3p                       | plasma membrane transporter. regulating pH homeostasis. cell migration and cell volume and tumor growth.                    |
| 23 | <i>CPEB3</i>  | 6.72728E-06 | 7 | 16-5p; 15a-5p; 21-5p; 15b-5p; 92a-3p; 25-3p; 26a-5p                 | RNA-binding protein (translational repressor)                                                                               |
| 24 | <i>NOTCH2</i> | 7.37889E-06 | 7 | 16-5p; 15a-5p; 9-3p; 15b-5p; 92a-3p; 25-3p; 9-5p                    | NOTCH signaling pathway                                                                                                     |
| 25 | <i>ANKIB1</i> | 8.02984E-06 | 5 | 19a-3p; 19b-3p; 92a-3p; 25-3p; 20a-5p                               | positive regulation of proteasomal ubiquitin-dependent protein catabolic process                                            |
| 26 | <i>TIMP3</i>  | 8.02984E-06 | 5 | 16-5p; 221-3p; 423-5p; 21-5p; 17-3p                                 | tissue inhibitor of metalloproteinases                                                                                      |
| 27 | <i>AP3M1</i>  | 9.36439E-06 | 6 | 16-5p; 15a-5p; 423-5p; 21-5p; 15b-5p; 25-3p                         | intracellular protein transport. endocytosis. anterograde axonal and synaptic vesicle transport. vesicle-mediated transport |
| 28 | <i>CLIC1</i>  | 0.0000109   | 4 | 221-3p; 92a-3p; 106b-3p; 25-3p                                      | regulation of ion transmembrane transport and cell cycle                                                                    |
| 29 | <i>NOL4L</i>  | 0.0000109   | 4 | 16-5p; 15a-5p; 15b-5p; 92a-3p                                       | Nucleolar Protein 4 Like                                                                                                    |

#### tumor miRNAs

| No | GENES         | q-value     | number of miRs observed | hsa-miRs                                                                                                                                                                                                                                                                                   | Biological processes/Molecular function                                                                                                   |
|----|---------------|-------------|-------------------------|--------------------------------------------------------------------------------------------------------------------------------------------------------------------------------------------------------------------------------------------------------------------------------------------|-------------------------------------------------------------------------------------------------------------------------------------------|
| 1  | <i>BCL2</i>   | 1.96921E-17 | 35                      | 17-5p; 182-5p; 20a-5p; 96-5p; 18a-5p; 200c-3p; 497-5p; 181c-5p; 15b-5p; 9-5p; 16-5p; 192-5p; 376c-3p; 451a; 125a-5p; 195-5p; 143-3p; hsa-let-7a-5p; 135a-5p; 148a-3p; 30b-5p; 98-5p; 15a-5p; 139-5p; 33b-5p; 181d-5p; 7-5p; 204-5p; 494-3p; 21-5p; 136-5p; 153-3p; 211-5p; 125b-5p; 126-3p | apoptosis. lymphoid progenitor cell differentiation. B cell homeostasis                                                                   |
| 2  | <i>ARCN1</i>  | 7.39538E-12 | 18                      | 92a-3p; 17-5p; 20a-5p; hsa-let-7e-5p; 93-5p; 106b-5p; 15b-5p; 130b-3p; 16-5p; 195-5p; 30c-5p; 98-5p; 15a-5p; 26a-5p; 1-3p; hsa-let-7b-5p; 20b-5p; 770-5p                                                                                                                                   | vesicle-mediated transport                                                                                                                |
| 3  | <i>RUNX2</i>  | 7.39538E-12 | 19                      | 155-5p; 497-5p; 30d-5p; 376c-3p; 628-3p; 124-3p; 30a-5p; 195-5p; 203a-3p; 218-5p; 135a-5p; 30c-5p; 30b-5p; 484; 433-3p; 204-5p; 30a-3p; 23b-3p; 221-5p                                                                                                                                     | cell (neuron) differentiation. proliferation. maturation; regulation of transcription. DNA-templated regulation of FGFR signaling pathway |
| 4  | <i>NOTCH2</i> | 1.51097E-11 | 26                      | 92a-3p; 17-5p; 182-5p; 155-5p; 96-5p; hsa-let-7c-5p; 183-5p; 744-5p; 130b-5p; 497-5p; 146a-5p; 15b-5p; 25-3p; 9-5p; 16-5p; 9-3p; 191-5p; 195-5p; 543; 29b-1-5p; 1248; 15a-5p; 106a-5p; 1-3p; 27b-3p; 23b-3p                                                                                | NOTCH signaling pathway                                                                                                                   |

|    |        |             |    |                                                                                                                                                                                                                                                                                                                                                       |                                                                                                                                                                                                                                                                                                                                                                                                          |
|----|--------|-------------|----|-------------------------------------------------------------------------------------------------------------------------------------------------------------------------------------------------------------------------------------------------------------------------------------------------------------------------------------------------------|----------------------------------------------------------------------------------------------------------------------------------------------------------------------------------------------------------------------------------------------------------------------------------------------------------------------------------------------------------------------------------------------------------|
| 5  | MYC    | 1.75462E-11 | 39 | 92a-3p; 17-5p; 20a-5p; 155-5p; 19a-3p; 19b-1-5p; hsa-let-7c-5p; hsa-let-7e-5p; 92a-1-5p; 744-5p; 16-2-3p; 93-5p; 106b-5p; 25-3p; 16-5p; 30d-5p; 186-5p; 451a; 125a-5p; hsa-let-7a-5p; 135a-5p; 423-5p; 487b-3p; 148a-3p; 30c-5p; 1248; 130a-3p; 98-5p; 129-2-3p; 323a-3p; 33b-5p; 378a-3p; 7-5p; 494-3p; hsa-let-7b-5p; 21-5p; 30a-3p; 145-5p; 92b-3p | proto-oncogene. cell proliferation. apoptosis. regulation of transcription. DNA-templated. MAPK cascade. Notch signaling pathway                                                                                                                                                                                                                                                                         |
| 6  | APC    | 5.46947E-11 | 15 | 155-5p; 142-3p; 106b-5p; 210-3p; 192-5p; 186-5p; 218-5p; 135a-5p; 148a-3p; 129-5p; 106a-5p; 27a-3p; 21-5p; 590-3p; 125b-5p                                                                                                                                                                                                                            | tumor suppressor gene; regulation of cell migration. differentiation. adhesion; cell cycle arrest; positive regulation of cell death; negative regulation of Wnt signaling pathway                                                                                                                                                                                                                       |
| 7  | EZH2   | 2.52009E-10 | 22 | hsa-let-7c-5p; hsa-let-7e-5p; 1260b; 1260a; 93-5p; 25-3p; 30d-5p; 124-3p; hsa-let-7a-5p; 144-3p; 101-5p; 484; 98-5p; 26a-5p; 320c; 138-5p; 532-3p; 340-3p; 27a-3p; hsa-let-7b-5p; 126-3p; 92b-3p                                                                                                                                                      | epigenetic regulation                                                                                                                                                                                                                                                                                                                                                                                    |
| 8  | PRPF8  | 6.05297E-10 | 17 | 92a-3p; 17-5p; hsa-let-7c-5p; hsa-let-7e-5p; 93-5p; 25-3p; 16-5p; 381-3p; 186-5p; 218-5p; 93-3p; 484; 106a-5p; 532-3p; 409-3p; 27b-3p; hsa-let-7b-5p                                                                                                                                                                                                  | RNA/mRNA splicing. cellular response to tumor necrosis factor                                                                                                                                                                                                                                                                                                                                            |
| 9  | BMPR2  | 9.73221E-10 | 23 | 92a-3p; 17-5p; 20a-5p; 19a-3p; 93-5p; 19b-3p; 181c-5p; 106b-5p; 3615; 192-5p; 128-3p; 135a-5p; 93-3p; 130a-3p; 181d-5p; 7-5p; 27b-3p; 27a-3p; 32-5p; 21-5p; 20b-5p; 153-3p; 92b-3p                                                                                                                                                                    | TGF beta receptor. BMP signaling pathway. cell proliferation (endothelial) growth. migration and differentiation. brain development                                                                                                                                                                                                                                                                      |
| 10 | AGO1   | 1.2065E-09  | 35 | 92a-3p; 17-5p; 20a-5p; 19a-3p; hsa-let-7c-5p; hsa-let-7e-5p; 744-5p; 93-5p; 19b-3p; 106b-5p; 130b-3p; 25-3p; 30d-5p; 628-3p; 186-5p; 31-5p; 195-5p; hsa-let-7a-5p; 218-5p; 30c-5p; 99a-5p; 93-3p; 484; 149-5p; 194-5p; 26a-5p; 106a-5p; 423-3p; 320c; 1-3p; 378a-3p; 138-5p; 769-3p; hsa-let-7b-5p; 20b-5p                                            | RNA-induced silencing complex (RISC)                                                                                                                                                                                                                                                                                                                                                                     |
| 11 | BTBD7  | 1.2065E-09  | 17 | 92a-3p; 17-5p; 20a-5p; 19a-3p; 142-3p; 93-5p; 19b-3p; 106b-5p; 25-3p; 30d-5p; 30a-5p; 218-5p; 30c-5p; 1248; 30b-5p; 21-5p; 20b-5p                                                                                                                                                                                                                     | reducing cell-cell adhesion                                                                                                                                                                                                                                                                                                                                                                              |
| 12 | PTEN   | 1.4554E-09  | 36 | 92a-3p; 106b-3p; 17-5p; 182-5p; 20a-5p; 155-5p; 18a-5p; 19a-3p; 17-3p; 142-5p; 92a-1-5p; 93-5p; 200c-3p; 19b-3p; 181c-5p; 106b-5p; 130b-3p; 25-3p; 486-5p; 425-5p; 128-3p; 543; 21-3p; 144-3p; 130a-3p; 376a-5p; 26a-5p; 106a-5p; 382-5p; 494-3p; 32-5p; 21-5p; 20b-5p; 153-3p; 23b-3p; 92b-3p                                                        | PI3K-AKT-mTOR signaling pathway. regulation of ERK1 and ERK2 cascade. Wnt signaling pathway. regulation of B cell apoptotic process. neuron-neuron synaptic transmission; CNS development. myelin maintenance; cell migration. proliferation. differentiation                                                                                                                                            |
| 13 | IL6    | 3.89154E-09 | 15 | 155-5p; hsa-let-7c-5p; 142-3p; 146a-5p; 9-5p; 124-3p; 451a; 203a-3p; hsa-let-7a-5p; 98-5p; 149-5p; 26a-5p; 106a-5p; 1-3p; 136-5p                                                                                                                                                                                                                      | JAK-STAT signaling pathway. positive regulation of TNF. VEGF. positive regulation of epithelial to mesenchymal transition. maintenance of blood-brain barrier. regulation of cell migration. proliferation. differentiation. apoptotic process. translation. positive regulation of B cell activation. regulation of microglial cell activation and glial cell proliferation. neuroinflammatory response |
| 14 | CAMTA1 | 5.51732E-09 | 12 | 17-5p; 20a-5p; 155-5p; 96-5p; 19a-3p; 93-5p; 19b-3p; 106b-5p; 124-3p; 218-5p; 129-5p; 20b-5p                                                                                                                                                                                                                                                          | transcription factor and tumor suppressor                                                                                                                                                                                                                                                                                                                                                                |

|                                                  |                |             |    |                                                                                                                                                                  |                         |
|--------------------------------------------------|----------------|-------------|----|------------------------------------------------------------------------------------------------------------------------------------------------------------------|-------------------------|
| 15                                               | <i>PRKAR1A</i> | 5.51732E-09 | 19 | 17-5p; 20a-5p; 155-5p; 96-5p;<br>1246; 93-5p; 106b-5p; 25-3p;<br>16-5p; 192-5p; 30d-5p; 30a-5p;<br>30c-5p; 30b-5p; 106a-5p; 323a-<br>3p; 204-5p; 20b-5p; 1296-5p | cAMP signaling pathways |
| *p-value after the Benjamini-Hochberg adjustment |                |             |    |                                                                                                                                                                  |                         |
