# Supplementary material for: A Set of 17 microRNAs Common for Brain and Cerebrospinal Fluid Differentiates Primary Central Nervous System Lymphoma from Non-Malignant Brain Tumors
Source: MDPI journal article supplement (doi:10.3390/biom11091395), 2021-09-21
Supplement: s1 [file s1]

Supplementary Table S1

A list of miRNAs verified by RT-qPCR (TaqMan Advanced miRNA Assay).

| <b>TaqMan Advanced<br/>miRNA Assay</b>    | <b>ID number Applied<br/>Biosystems CN A25576</b> |
|-------------------------------------------|---------------------------------------------------|
| miR-9-5p                                  | ID 478214_mir                                     |
| miR-9-3p*                                 | ID 478211_mir                                     |
| miR-15a-5p                                | ID 477858_mir                                     |
| miR-15b-5p                                | ID 478313_mir                                     |
| miR-16-5p                                 | ID 477860_mir                                     |
| miR-17-3p                                 | ID 477932_mir                                     |
| miR-19a-3p                                | ID 479228_mir                                     |
| miR-19b-3p                                | ID 478264_mir                                     |
| miR-20a-5p                                | ID 478586_mir                                     |
| miR-21-5p                                 | ID 477973_mir                                     |
| miR-25-3p                                 | ID 477994_mir                                     |
| miR-26a-5p                                | ID 477995_mir                                     |
| miR-92a-3p                                | ID 477827_mir                                     |
| miR-106b-3p                               | ID 477866_mir                                     |
| miR-148a-3p                               | ID 477814_mir                                     |
| miR-210-3p                                | ID 477970_mir                                     |
| miR-221-3p                                | ID 477981_mir                                     |
| miR-423-5p                                | ID 478090_mir                                     |
| <b>Internal control for tumor samples</b> |                                                   |
| miR-24-3p                                 | ID 477992_mir                                     |
| <b>Internal controls for CSF samples</b>  |                                                   |
| miR-23a-3p                                | ID 478532_mir                                     |
| miR-24-3p                                 | ID 477992_mir                                     |
