# Supplementary material for: A Set of 17 microRNAs Common for Brain and Cerebrospinal Fluid Differentiates Primary Central Nervous System Lymphoma from Non-Malignant Brain Tumors
Source: MDPI journal article supplement (doi:10.3390/biom11091395), 2021-09-21
Supplement: s1 [file s1]

# Supplementary Table S9

## Molecular functions of CNS DLBCL-specific CSF microRNAs.

| <b>GO Annotations</b> |                                                                          |                 |                                |                                                                                     |
|-----------------------|--------------------------------------------------------------------------|-----------------|--------------------------------|-------------------------------------------------------------------------------------|
| <b>No</b>             | <b>subcategory</b>                                                       | <b>q-value*</b> | <b>number of miRs observed</b> | <b>hsa-miRs</b>                                                                     |
| 1                     | miRNA mediated inhibition of translation                                 | 0.0028406       | 11                             | 16-5p; 148a-3p; 15a-5p; 19b-3p; 221-3p; 21-5p; 15b-5p; 210-3p; 92a-3p; 9-5p; 20a-5p |
| 2                     | negative regulation of cell population proliferation                     | 0.0028406       | 7                              | 16-5p; 15a-5p; 221-3p; 21-5p; 15b-5p; 9-5p; 26a-5p                                  |
| 3                     | positive regulation of tyrosine phosphorylation of STAT protein          | 0.0062128       | 3                              | 19a-3p; 19b-3p; 221-3p                                                              |
| 4                     | extracellular exosome                                                    | 0.0100212       | 6                              | 19a-3p; 16-5p; 15a-5p; 21-5p; 9-3p; 9-5p                                            |
| 5                     | negative regulation of cell migration involved in sprouting angiogenesis | 0.0100328       | 6                              | 16-5p; 15a-5p; 19b-3p; 221-3p; 20a-5p; 26a-5p                                       |
| 6                     | negative regulation of vascular smooth muscle cell differentiation       | 0.0100328       | 3                              | 221-3p; 15b-5p; 26a-5p                                                              |
| 7                     | positive regulation of apoptotic process                                 | 0.0100328       | 5                              | 16-5p; 15a-5p; 221-3p; 15b-5p; 92a-3p                                               |
| 8                     | positive regulation of vascular associated smooth muscle cell migration  | 0.0100328       | 4                              | 221-3p; 21-5p; 20a-5p; 26a-5p                                                       |
| 9                     | negative regulation of G1S transition of mitotic cell cycle              | 0.0159948       | 5                              | 16-5p; 15a-5p; 21-5p; 15b-5p; 26a-5p                                                |
| 10                    | negative regulation of I-kappaB kinaseNF-kappaB signaling                | 0.0159948       | 3                              | 16-5p; 15a-5p; 15b-5p                                                               |
| 11                    | negative regulation of inflammatory response                             | 0.0159948       | 6                              | 19a-3p; 16-5p; 15a-5p; 221-3p; 92a-3p; 20a-5p                                       |

| <b>GO Annotations indirect</b> |                                                                      |                |                                |                                                                                                                                    |
|--------------------------------|----------------------------------------------------------------------|----------------|--------------------------------|------------------------------------------------------------------------------------------------------------------------------------|
| <b>No</b>                      | <b>subcategory</b>                                                   | <b>q-value</b> | <b>number of miRs observed</b> | <b>hsa-miRs</b>                                                                                                                    |
| 1                              | neuron apoptotic process                                             | 1.66625E-10    | 17                             | 19a-3p; 16-5p; 148a-3p; 15a-5p; 19b-3p; 221-3p; 423-5p; 21-5p; 15b-5p; 17-3p; 210-3p; 92a-3p; 106b-3p; 25-3p; 9-5p; 20a-5p; 26a-5p |
| 2                              | anaphase-promoting complex binding                                   | 3.1119E-09     | 15                             | 19a-3p; 16-5p; 15a-5p; 19b-3p; 221-3p; 423-5p; 21-5p; 15b-5p; 17-3p; 210-3p; 92a-3p; 106b-3p; 25-3p; 20a-5p; 26a-5p                |
| 3                              | maintenance of DNA methylation                                       | 4.28806E-09    | 10                             | 19a-3p; 16-5p; 148a-3p; 19b-3p; 221-3p; 21-5p; 92a-3p; 9-5p; 20a-5p; 26a-5p                                                        |
| 4                              | cellular response to epinephrine stimulus                            | 9.01727E-09    | 10                             | 19a-3p; 16-5p; 15a-5p; 19b-3p; 423-5p; 21-5p; 15b-5p; 92a-3p; 25-3p; 26a-5p                                                        |
| 5                              | inositol phosphate dephosphorylation                                 | 9.01727E-09    | 14                             | 19a-3p; 16-5p; 15a-5p; 19b-3p; 221-3p; 21-5p; 15b-5p; 17-3p; 210-3p; 92a-3p; 106b-3p; 25-3p; 20a-5p; 26a-5p                        |
| 6                              | negative regulation of wound healing. spreading of epidermal cells   | 9.01727E-09    | 13                             | 19a-3p; 16-5p; 148a-3p; 19b-3p; 221-3p; 21-5p; 17-3p; 210-3p; 92a-3p; 106b-3p; 25-3p; 20a-5p; 26a-5p                               |
| 7                              | phosphatidylinositol-3-phosphatase activity                          | 9.01727E-09    | 14                             | 19a-3p; 16-5p; 15a-5p; 19b-3p; 221-3p; 423-5p; 21-5p; 15b-5p; 17-3p; 92a-3p; 106b-3p; 25-3p; 20a-5p; 26a-5p                        |
| 8                              | positive regulation of TRAIL-activated apoptotic signaling pathway   | 1.60974E-08    | 12                             | 19a-3p; 16-5p; 19b-3p; 221-3p; 423-5p; 21-5p; 17-3p; 92a-3p; 106b-3p; 25-3p; 20a-5p; 26a-5p                                        |
| 9                              | positive regulation of ubiquitin-dependent protein catabolic process | 2.25879E-08    | 14                             | 19a-3p; 16-5p; 15a-5p; 19b-3p; 221-3p; 423-5p; 21-5p; 15b-5p; 17-3p; 92a-3p; 106b-3p; 25-3p; 20a-5p; 26a-5p                        |
| 10                             | regulation of transmembrane transporter activity                     | 2.25879E-08    | 13                             | 19a-3p; 16-5p; 148a-3p; 15a-5p; 19b-3p; 221-3p; 21-5p; 15b-5p; 210-3p; 92a-3p; 9-5p; 20a-5p; 26a-5p                                |

|    |                                                                 |             |    |                                                                                                                                  |
|----|-----------------------------------------------------------------|-------------|----|----------------------------------------------------------------------------------------------------------------------------------|
| 11 | negative regulation of stress-activated MAPK cascade            | 2.33102E-08 | 13 | 19a-3p; 16-5p; 148a-3p; 15a-5p; 423-5p; 21-5p; 9-3p; 15b-5p; 92a-3p; 106b-3p; 25-3p; 9-5p; 20a-5p                                |
| 12 | atrial septum morphogenesis                                     | 2.37975E-08 | 13 | 19a-3p; 16-5p; 148a-3p; 15a-5p; 19b-3p; 21-5p; 9-3p; 15b-5p; 92a-3p; 25-3p; 9-5p; 20a-5p; 26a-5p                                 |
| 13 | central nervous system myelin maintenance                       | 2.37975E-08 | 13 | 19a-3p; 16-5p; 15a-5p; 19b-3p; 221-3p; 21-5p; 15b-5p; 17-3p; 92a-3p; 106b-3p; 25-3p; 20a-5p; 26a-5p                              |
| 14 | positive regulation of ossification                             | 3.81655E-08 | 13 | 19a-3p; 16-5p; 148a-3p; 15a-5p; 19b-3p; 221-3p; 21-5p; 15b-5p; 92a-3p; 106b-3p; 25-3p; 20a-5p; 26a-5p                            |
| 15 | nuclear-transcribed mRNA catabolic process. no-go decay         | 4.39091E-08 | 11 | 19a-3p; 16-5p; 15a-5p; 19b-3p; 221-3p; 423-5p; 15b-5p; 92a-3p; 25-3p; 9-5p; 20a-5p                                               |
| 16 | prepulse inhibition                                             | 4.49503E-08 | 11 | 19a-3p; 19b-3p; 221-3p; 21-5p; 17-3p; 92a-3p; 106b-3p; 25-3p; 9-5p; 20a-5p; 26a-5p                                               |
| 17 | rRNA adenine-N6.N6--dimethyltransferase activity                | 4.76441E-08 | 6  | 19a-3p; 16-5p; 15a-5p; 19b-3p; 15b-5p; 210-3p                                                                                    |
| 18 | synapse assembly                                                | 4.76441E-08 | 17 | 19a-3p; 16-5p; 148a-3p; 15a-5p; 19b-3p; 221-3p; 423-5p; 21-5p; 9-3p; 17-3p; 210-3p; 92a-3p; 106b-3p; 25-3p; 9-5p; 20a-5p; 26a-5p |
| 19 | central nervous system neuron axonogenesis                      | 5.01429E-08 | 15 | 19a-3p; 16-5p; 148a-3p; 19b-3p; 221-3p; 21-5p; 9-3p; 15b-5p; 17-3p; 210-3p; 92a-3p; 106b-3p; 25-3p; 20a-5p; 26a-5p               |
| 20 | motor behavior                                                  | 5.01429E-08 | 9  | 19a-3p; 16-5p; 15a-5p; 19b-3p; 15b-5p; 17-3p; 25-3p; 9-5p; 26a-5p                                                                |
| 21 | targeting of mRNA for destruction involved in RNA interference  | 5.01429E-08 | 10 | 19a-3p; 16-5p; 148a-3p; 15a-5p; 19b-3p; 221-3p; 21-5p; 15b-5p; 25-3p; 9-5p                                                       |
| 22 | RNA stem-loop binding                                           | 5.44842E-08 | 13 | 19a-3p; 16-5p; 15a-5p; 19b-3p; 221-3p; 423-5p; 21-5p; 15b-5p; 92a-3p; 106b-3p; 25-3p; 9-5p; 26a-5p                               |
| 23 | negative regulation of cytoplasmic translation                  | 5.44842E-08 | 13 | 16-5p; 15a-5p; 221-3p; 423-5p; 21-5p; 15b-5p; 17-3p; 210-3p; 92a-3p; 25-3p; 9-5p; 20a-5p; 26a-5p                                 |
| 24 | nerve development                                               | 5.44842E-08 | 11 | 19a-3p; 16-5p; 148a-3p; 15a-5p; 19b-3p; 221-3p; 21-5p; 15b-5p; 210-3p; 9-5p; 26a-5p                                              |
| 25 | neuron-neuron synaptic transmission                             | 5.44842E-08 | 12 | 19a-3p; 16-5p; 19b-3p; 221-3p; 21-5p; 17-3p; 92a-3p; 106b-3p; 25-3p; 9-5p; 20a-5p; 26a-5p                                        |
| 26 | brain morphogenesis                                             | 7.55843E-08 | 14 | 19a-3p; 16-5p; 15a-5p; 19b-3p; 221-3p; 423-5p; 21-5p; 15b-5p; 17-3p; 92a-3p; 106b-3p; 25-3p; 20a-5p; 26a-5p                      |
| 27 | negative regulation of T-helper 17 cell differentiation         | 7.59629E-08 | 10 | 16-5p; 15a-5p; 423-5p; 21-5p; 15b-5p; 210-3p; 92a-3p; 25-3p; 9-5p; 20a-5p                                                        |
| 28 | ARC complex                                                     | 8.3917E-08  | 9  | 19a-3p; 16-5p; 148a-3p; 15a-5p; 19b-3p; 221-3p; 21-5p; 15b-5p; 9-5p                                                              |
| 29 | conversion of ds siRNA to ss siRNA                              | 8.3917E-08  | 9  | 19a-3p; 16-5p; 148a-3p; 15a-5p; 19b-3p; 221-3p; 21-5p; 15b-5p; 9-5p                                                              |
| 30 | conversion of ds siRNA to ss siRNA involved in RNA interference | 8.3917E-08  | 9  | 19a-3p; 16-5p; 148a-3p; 15a-5p; 19b-3p; 221-3p; 21-5p; 15b-5p; 9-5p                                                              |
| 31 | gamete generation                                               | 8.3917E-08  | 12 | 19a-3p; 16-5p; 15a-5p; 19b-3p; 221-3p; 21-5p; 15b-5p; 17-3p; 92a-3p; 25-3p; 9-5p; 26a-5p                                         |
| 32 | negative regulation of insulin secretion                        | 8.3917E-08  | 16 | 19a-3p; 16-5p; 148a-3p; 15a-5p; 19b-3p; 221-3p; 423-5p; 21-5p; 9-3p; 15b-5p; 210-3p; 92a-3p; 106b-3p; 25-3p; 9-5p; 20a-5p        |
| 33 | positive regulation of Schwann cell differentiation             | 8.3917E-08  | 9  | 19a-3p; 16-5p; 148a-3p; 15a-5p; 19b-3p; 221-3p; 21-5p; 15b-5p; 9-5p                                                              |

\*p-value after the Benjamini-Hochberg adjustment
