# Supplementary material for: A Set of 17 microRNAs Common for Brain and Cerebrospinal Fluid Differentiates Primary Central Nervous System Lymphoma from Non-Malignant Brain Tumors
Source: MDPI journal article supplement (doi:10.3390/biom11091395), 2021-09-21
Supplement: s1 [file s1]

# Supplementary Table S3

A list of CSF and tumor miRs significantly differentiating CNS DLBCL and n-ML diseases.

| CSF miRs         |          |       |       |
|------------------|----------|-------|-------|
| miRs             | q-value* | FC    | AUC   |
| hsa-miR-9-3p     | 0.0165   | 0.14  | 0.84  |
| hsa-miR-9-5p     | 0.0299   | 0.15  | 0.79  |
| hsa-miR-15a-5p   | 0.0095   | 5.31  | 0.58  |
| hsa-miR-15b-5p   | 0.0198   | 5.24  | 0.79  |
| hsa-miR-16-5p    | 0.0067   | 4.34  | 0.72  |
| hsa-miR-17-3p    | 0.0198   | 16.11 | 0.73  |
| hsa-miR-19a-3p   | 8.56E-04 | 4.79  | 0.96  |
| hsa-miR-19b-3p   | 0.0095   | 3.16  | 0.73  |
| hsa-miR-20a-5p   | 0.0334   | 5.71  | 0.68  |
| hsa-miR-21-5p    | 0.0165   | 3.40  | 0.76  |
| hsa-miR-25-3p    | 0.0260   | 12.46 | 0.37  |
| hsa-miR-26a-5p   | 0.0337   | 0.40  | 0.76  |
| hsa-miR-92a-3p   | 0.0219   | 6.08  | 0.61  |
| hsa-miR-106b-3p  | 0.0253   | 19.51 | 0.32  |
| hsa-miR-148a-3p  | 0.0095   | 9.45  | 0.70  |
| hsa-miR-210-3p   | 0.0198   | 10.48 | 0.68  |
| hsa-miR-221-3p   | 9.46E-03 | 4,75  | 0.73  |
| hsa-miR-423-5p   | 0.0115   | 4.15  | 0.68  |
| Tumor miRs       |          |       |       |
| hsa-miR-1-3p     | 1.36E-02 | 0.29  | 0.76  |
| hsa-miR-7-5p     | 8.24E-03 | 0.36  | 0.82  |
| hsa-let-7a-5p    | 1.95E-03 | 0.53  | 0.9   |
| hsa-let-7b-5p    | 2.32E-02 | 0.55  | 0.84  |
| hsa-let-7c-5p    | 1.17E-07 | 0.21  | 1     |
| hsa-let-7e-5p    | 7.85E-07 | 0.28  | 0.98  |
| hsa-miR-9-3p     | 9.33E-04 | 0.24  | 0.86  |
| hsa-miR-9-5p     | 8.62E-05 | 0.22  | 0.89  |
| hsa-miR-15a-5p   | 1.32E-02 | 2.05  | 0.81  |
| hsa-miR-15b-3p   | 1.64E-06 | 6.83  | 0.87  |
| hsa-miR-15b-5p   | 8.62E-05 | 5.23  | 0.87  |
| hsa-miR-16-2-3p  | 2.89E-06 | 4.87  | 0.95  |
| hsa-miR-16-5p    | 4.93E-04 | 2.57  | 0.93  |
| hsa-miR-17-3p    | 8.01E-07 | 5.37  | 0.9   |
| hsa-miR-17-5p    | 1.50E-09 | 6.70  | 0.99  |
| hsa-miR-18a-5p   | 3.96E-09 | 5.87  | 0.99  |
| hsa-miR-18b-5p   | 1.99E-02 | 2.45  | 0.715 |
| hsa-miR-19a-3p   | 1.16E-07 | 6.61  | 0.96  |
| hsa-miR-19b-1-5p | 2.97E-07 | 9.96  | 0.94  |
| hsa-miR-19b-3p   | 1.10E-05 | 5.06  | 0.95  |
| hsa-miR-20a-5p   | 1.50E-09 | 8.96  | 0.98  |
| hsa-miR-21-3p    | 4.83E-03 | 4.65  | 0.905 |
| hsa-miR-21-5p    | 3.11E-02 | 2.78  | 0.83  |
| hsa-miR-25-3p    | 4.49E-04 | 3.45  | 0.83  |
| hsa-miR-26a-5p   | 9.68E-03 | 0.65  | 0.89  |
| hsa-miR-26b-3p   | 9.77E-03 | 2.22  | 0.89  |
| hsa-miR-27a-3p   | 2.73E-02 | 1.84  | 0.79  |

|                   |          |       |       |
|-------------------|----------|-------|-------|
| hsa-miR-27b-3p    | 4.04E-02 | 0.60  | 0.8   |
| hsa-miR-30a-3p    | 1.97E-02 | 0.38  | 0.8   |
| hsa-miR-30a-5p    | 5.87E-04 | 0.36  | 0.91  |
| hsa-miR-30b-5p    | 1.80E-02 | 2.77  | 0.58  |
| hsa-miR-30c-5p    | 3.01E-03 | 0.58  | 0.84  |
| hsa-miR-30d-5p    | 1.36E-03 | 3.79  | 0.75  |
| hsa-miR-31-3p     | 5.44E-03 | 0.31  | 0.88  |
| hsa-miR-31-5p     | 5.50E-04 | 0.33  | 0.91  |
| hsa-miR-32-5p     | 2.41E-02 | 2.37  | 0.81  |
| hsa-miR-92a-1-5p  | 6.70E-06 | 18.41 | 0.72  |
| hsa-miR-92a-3p    | 1.52E-08 | 5.77  | 0.98  |
| hsa-miR-92b-3p    | 3.09E-02 | 0.44  | 0.76  |
| hsa-miR-92b-5p    | 2.48E-02 | 0.44  | 0.74  |
| hsa-miR-93-3p     | 2.73E-02 | 2.14  | 0.78  |
| hsa-miR-93-5p     | 2.00E-05 | 3.34  | 1     |
| hsa-miR-95-3p     | 6.73E-03 | 0.36  | 0.87  |
| hsa-miR-96-5p     | 9.36E-10 | 12.18 | 0.9   |
| hsa-miR-98-5p     | 3.20E-03 | 0.54  | 0.9   |
| hsa-miR-99a-3p    | 1.75E-04 | 0.29  | 0.97  |
| hsa-miR-99a-5p    | 5.30E-03 | 0.32  | 0.87  |
| hsa-miR-99b-3p    | 1.99E-02 | 0.51  | 0.9   |
| hsa-miR-99b-5p    | 3.99E-02 | 0.56  | 0.78  |
| hsa-miR-101-5p    | 4.16E-03 | 0.40  | 0.89  |
| hsa-miR-106a-5p   | 3.22E-02 | 2.17  | 0.71  |
| hsa-miR-106b-3p   | 8.02E-10 | 7.09  | 1     |
| hsa-miR-106b-5p   | 1.16E-04 | 3.39  | 0.91  |
| hsa-miR-124-3p    | 3.81E-04 | 0.12  | 0.9   |
| hsa-miR-124-5p    | 1.97E-02 | 0.23  | 0.825 |
| hsa-miR-125a-5p   | 1.36E-03 | 0.43  | 0.92  |
| hsa-miR-125b-2-3p | 5.02E-04 | 0.30  | 0.96  |
| hsa-miR-125b-5p   | 4.47E-02 | 0.53  | 0.84  |
| hsa-miR-126-3p    | 3.11E-02 | 0.58  | 0.8   |
| hsa-miR-127-3p    | 1.21E-02 | 0.38  | 0.85  |
| hsa-miR-127-5p    | 6.18E-04 | 0.29  | 0.93  |
| hsa-miR-128-3p    | 1.36E-03 | 0.27  | 0.86  |
| hsa-miR-129-1-3p  | 2.81E-03 | 0.22  | 0.85  |
| hsa-miR-129-2-3p  | 7.36E-03 | 0.30  | 0.84  |
| hsa-miR-129-5p    | 2.48E-03 | 0.29  | 0.88  |
| hsa-miR-130a-3p   | 4.16E-03 | 0.52  | 0.91  |
| hsa-miR-130b-3p   | 1.75E-04 | 3.62  | 0.82  |
| hsa-miR-130b-5p   | 1.75E-04 | 4.13  | 0.87  |
| hsa-miR-132-3p    | 4.27E-03 | 0.40  | 0.86  |
| hsa-miR-132-5p    | 8.43E-03 | 0.38  | 0.82  |
| hsa-miR-134-5p    | 4.85E-03 | 0.35  | 0.91  |
| hsa-miR-135a-5p   | 2.55E-03 | 0.26  | 0.88  |
| hsa-miR-136-3p    | 1.26E-03 | 0.24  | 0.82  |
| hsa-miR-136-5p    | 2.37E-02 | 0.42  | 0.73  |
| hsa-miR-137       | 4.83E-03 | 0.23  | 0.85  |
| hsa-miR-138-5p    | 2.13E-02 | 0.34  | 0.77  |
| hsa-miR-139-3p    | 2.54E-02 | 0.27  | 0.835 |
| hsa-miR-139-5p    | 9.30E-03 | 0.25  | 0.86  |
| hsa-miR-142-3p    | 7.76E-07 | 14.27 | 0.97  |
| hsa-miR-142-5p    | 1.16E-07 | 11.28 | 0.97  |
| hsa-miR-143-3p    | 1.04E-03 | 0.43  | 0.83  |
| hsa-miR-144-3p    | 1.32E-02 | 4.30  | 0.78  |

|                 |          |       |       |
|-----------------|----------|-------|-------|
| hsa-miR-144-5p  | 2.48E-02 | 3.09  | 0.75  |
| hsa-miR-145-5p  | 1.97E-02 | 0.54  | 0.86  |
| hsa-miR-146a-5p | 1.22E-05 | 6.86  | 0.91  |
| hsa-miR-148a-3p | 1.04E-03 | 6.21  | 0.89  |
| hsa-miR-149-5p  | 5.48E-03 | 0.29  | 0.87  |
| hsa-miR-153-3p  | 2.64E-02 | 0.27  | 0.825 |
| hsa-miR-154-3p  | 1.65E-03 | 0.25  | 0.85  |
| hsa-miR-154-5p  | 1.31E-04 | 0.25  | 0.96  |
| hsa-miR-155-5p  | 1.92E-10 | 46.56 | 0.94  |
| hsa-miR-181c-3p | 1.77E-03 | 0.31  | 0.88  |
| hsa-miR-181c-5p | 1.46E-05 | 0.21  | 0.87  |
| hsa-miR-181d-5p | 1.25E-02 | 0.35  | 0.76  |
| hsa-miR-182-5p  | 1.92E-10 | 12.85 | 1     |
| hsa-miR-183-5p  | 6.91E-07 | 10.08 | 0.96  |
| hsa-miR-186-5p  | 1.32E-03 | 2.07  | 0.87  |
| hsa-miR-187-3p  | 1.59E-02 | 0.34  | 0.815 |
| hsa-miR-191-5p  | 4.83E-03 | 1.96  | 0.88  |
| hsa-miR-192-5p  | 1.07E-03 | 2.70  | 0.895 |
| hsa-miR-194-5p  | 4.28E-02 | 1.67  | 0.71  |
| hsa-miR-195-5p  | 1.93E-03 | 0.36  | 0.89  |
| hsa-miR-200c-3p | 1.06E-05 | 15.38 | 0.79  |
| hsa-miR-203a-3p | 1.77E-03 | 0.19  | 0.88  |
| hsa-miR-204-5p  | 1.70E-02 | 0.35  | 0.8   |
| hsa-miR-210-3p  | 2.27E-04 | 4.17  | 0.84  |
| hsa-miR-218-5p  | 1.95E-03 | 0.22  | 0.88  |
| hsa-miR-296-5p  | 3.22E-02 | 2.53  | 0.71  |
| hsa-miR-299-5p  | 8.72E-04 | 0.26  | 0.88  |
| hsa-miR-320c    | 3.45E-02 | 2.60  | 0.58  |
| hsa-miR-320d    | 3.99E-02 | 2.70  | 0.61  |
| hsa-miR-323a-3p | 9.36E-03 | 0.29  | 0.84  |
| hsa-miR-323b-3p | 4.13E-02 | 0.31  | 0.75  |
| hsa-miR-328-3p  | 2.53E-02 | 0.53  | 0.86  |
| hsa-miR-329-3p  | 5.53E-03 | 0.29  | 0.87  |
| hsa-miR-335-3p  | 1.56E-02 | 1.98  | 0.76  |
| hsa-miR-339-5p  | 3.15E-02 | 1.91  | 0.8   |
| hsa-miR-33b-5p  | 2.57E-02 | 0.44  | 0.81  |
| hsa-miR-361-3p  | 1.85E-02 | 1.88  | 0.84  |
| hsa-miR-369-3p  | 3.15E-02 | 0.37  | 0.695 |
| hsa-miR-369-5p  | 1.15E-03 | 0.29  | 0.9   |
| hsa-miR-370-3p  | 2.69E-02 | 0.40  | 0.81  |
| hsa-miR-376a-3p | 3.09E-04 | 0.28  | 0.92  |
| hsa-miR-376a-5p | 8.43E-03 | 0.25  | 0.845 |
| hsa-miR-376b-3p | 3.16E-02 | 0.44  | 0.75  |
| hsa-miR-376c-3p | 3.09E-04 | 0.25  | 0.86  |
| hsa-miR-378a-3p | 2.91E-02 | 2.29  | 0.8   |
| hsa-miR-378c    | 6.31E-03 | 3.91  | 0.78  |
| hsa-miR-378i    | 1.57E-02 | 3.39  | 0.82  |
| hsa-miR-379-5p  | 1.32E-03 | 0.24  | 0.88  |
| hsa-miR-380-3p  | 3.53E-03 | 0.26  | 0.83  |
| hsa-miR-381-3p  | 1.50E-04 | 0.27  | 0.93  |
| hsa-miR-382-3p  | 6.61E-03 | 0.30  | 0.79  |
| hsa-miR-382-5p  | 1.50E-02 | 0.40  | 0.86  |
| hsa-miR-383-5p  | 1.82E-02 | 0.29  | 0.85  |
| hsa-miR-409-3p  | 1.36E-02 | 0.41  | 0.87  |
| hsa-miR-409-5p  | 5.89E-03 | 0.35  | 0.87  |

|                 |          |        |       |
|-----------------|----------|--------|-------|
| hsa-miR-410-3p  | 3.66E-04 | 0.17   | 0.87  |
| hsa-miR-411-3p  | 1.81E-02 | 0.33   | 0.815 |
| hsa-miR-411-5p  | 7.36E-03 | 0.29   | 0.82  |
| hsa-miR-423-3p  | 3.75E-02 | 1.50   | 0.85  |
| hsa-miR-423-5p  | 1.25E-02 | 1.80   | 0.85  |
| hsa-miR-425-3p  | 3.99E-02 | 1.71   | 0.82  |
| hsa-miR-425-5p  | 5.50E-04 | 3.17   | 0.78  |
| hsa-miR-432-5p  | 1.12E-02 | 0.37   | 0.88  |
| hsa-miR-433-3p  | 7.60E-03 | 0.26   | 0.83  |
| hsa-miR-451a    | 3.61E-03 | 3.85   | 0.78  |
| hsa-miR-484     | 1.50E-02 | 1.60   | 0.86  |
| hsa-miR-485-3p  | 1.95E-03 | 0.23   | 0.87  |
| hsa-miR-485-5p  | 1.32E-03 | 0.23   | 0.92  |
| hsa-miR-486-3p  | 4.27E-03 | 3.76   | 0.75  |
| hsa-miR-486-5p  | 7.53E-04 | 4.32   | 0.63  |
| hsa-miR-487a-3p | 7.86E-03 | 0.29   | 0.82  |
| hsa-miR-487a-5p | 1.21E-02 | 0.28   | 0.835 |
| hsa-miR-487b-3p | 2.54E-03 | 0.23   | 0.85  |
| hsa-miR-491-5p  | 1.04E-03 | 0.25   | 0.93  |
| hsa-miR-494-3p  | 1.82E-02 | 0.43   | 0.79  |
| hsa-miR-495-3p  | 7.36E-03 | 0.33   | 0.79  |
| hsa-miR-497-5p  | 1.00E-05 | 0.34   | 0.96  |
| hsa-miR-504-5p  | 3.00E-02 | 0.26   | 0.83  |
| hsa-miR-505-3p  | 1.04E-02 | 2.15   | 0.83  |
| hsa-miR-532-3p  | 4.96E-02 | 2.04   | 0.83  |
| hsa-miR-539-5p  | 1.03E-03 | 0.29   | 0.87  |
| hsa-miR-543     | 1.95E-03 | 0.31   | 0.87  |
| hsa-miR-551b-3p | 6.61E-03 | 0.38   | 0.91  |
| hsa-miR-582-5p  | 1.61E-06 | 0.17   | 0.93  |
| hsa-miR-590-3p  | 4.18E-02 | 2.22   | 0.74  |
| hsa-miR-590-5p  | 1.66E-02 | 2.16   | 0.86  |
| hsa-miR-6087    | 6.40E-04 | 9.57   | 0.775 |
| hsa-miR-625-3p  | 4.70E-03 | 3.37   | 0.76  |
| hsa-miR-625-5p  | 1.99E-02 | 1.97   | 0.82  |
| hsa-miR-628-3p  | 2.35E-04 | 0.35   | 0.96  |
| hsa-miR-628-5p  | 6.76E-03 | 0.37   | 0.82  |
| hsa-miR-629-5p  | 3.18E-02 | 2.04   | 0.68  |
| hsa-miR-654-3p  | 2.71E-03 | 0.38   | 0.855 |
| hsa-miR-655-3p  | 1.19E-03 | 0.28   | 0.875 |
| hsa-miR-656-3p  | 2.60E-03 | 0.25   | 0.87  |
| hsa-miR-744-5p  | 1.16E-07 | 0.34   | 0.97  |
| hsa-miR-758-3p  | 5.35E-03 | 0.29   | 0.87  |
| hsa-miR-766-3p  | 2.92E-04 | 3.17   | 0.89  |
| hsa-miR-769-3p  | 1.44E-02 | 0.44   | 0.85  |
| hsa-miR-769-5p  | 1.04E-03 | 0.35   | 0.85  |
| hsa-miR-770-5p  | 4.06E-02 | 0.30   | 0.81  |
| hsa-miR-873-5p  | 4.46E-07 | 0.10   | 0.89  |
| hsa-miR-885-5p  | 1.81E-02 | 0.29   | 0.84  |
| hsa-miR-935     | 6.31E-03 | 0.22   | 0.89  |
| hsa-miR-1185-5p | 2.92E-04 | 0.18   | 0.9   |
| hsa-miR-1246    | 3.32E-08 | 419.95 | 0.81  |
| hsa-miR-1248    | 2.13E-02 | 2.75   | 0.71  |
| hsa-miR-1249-3p | 3.11E-02 | 0.42   | 0.74  |
| hsa-miR-1260a   | 4.12E-06 | 6.97   | 0.89  |
| hsa-miR-1260b   | 4.12E-06 | 7.03   | 0.89  |

|                  |          |        |       |
|------------------|----------|--------|-------|
| hsa-miR-1285-3p  | 4.90E-04 | 3.32   | 0.84  |
| hsa-miR-1290     | 1.33E-07 | 679.51 | 0.82  |
| hsa-miR-1296-5p  | 3.73E-02 | 0.45   | 0.87  |
| hsa-miR-3065-5p  | 1.36E-02 | 0.34   | 0.84  |
| hsa-miR-3613-5p  | 1.04E-02 | 2.66   | 0.81  |
| hsa-miR-3615     | 9.33E-04 | 4.17   | 0.8   |
| hsa-miR-4286     | 1.25E-02 | 2.77   | 0.71  |
| hsa-miR-4449     | 3.68E-04 | 12.44  | 0.675 |
| hsa-miR-4488     | 1.92E-10 | 114.60 | 0.885 |
| hsa-miR-4521     | 1.33E-07 | 21.63  | 0.87  |
| hsa-miR-4524a-3p | 2.35E-04 | 7.50   | 0.705 |
| hsa-miR-4792     | 4.85E-03 | 9.11   | 0.54  |
| hsa-miR-7641     | 6.31E-03 | 4.92   | 0.695 |

CNS DLBCL, primary diffuse large B-cell lymphoma of the central nervous system; n-ML, non-malignant brain lesions; q-value, p-value after the Benjamini-Hochberg adjustment; FC, fold change (CNS DLBCL/n-ML); AUC, Area under the curve obtained by Receiver Operator Characteristic  
\*p-value after the Benjamini-Hochberg adjustment
