# Supplementary material for: A Set of 17 microRNAs Common for Brain and Cerebrospinal Fluid Differentiates Primary Central Nervous System Lymphoma from Non-Malignant Brain Tumors
Source: MDPI journal article supplement (doi:10.3390/biom11091395), 2021-09-21
Supplement: s1 [file s1]

Supplementary Table S6  
CNS DLBCL-specific CSF microRNAs and diseases.

| <b>miRWalk_Diseases</b> |                                                    |                 |                                |                                                                                                              |
|-------------------------|----------------------------------------------------|-----------------|--------------------------------|--------------------------------------------------------------------------------------------------------------|
| <b>No</b>               | <b>subcategory</b>                                 | <b>q-value*</b> | <b>number of miRs observed</b> | <b>hsa-miRs</b>                                                                                              |
| 1                       | Hypertension Pulmonary                             | 0.0035763       | 4                              | 19a-3p; 19b-3p; 92a-3p; 20a-5p                                                                               |
| 2                       | Hypertension                                       | 0.0225845       | 4                              | 19a-3p; 19b-3p; 92a-3p; 20a-5p                                                                               |
| 3                       | Adenocarcinoma                                     | 0.0286493       | 7                              | 16-5p; 148a-3p; 15a-5p; 21-5p; 210-3p; 9-5p; 20a-5p                                                          |
| 4                       | Aneuploidy                                         | 0.0286493       | 2                              | 16-5p; 15a-5p                                                                                                |
| 5                       | Arthritis                                          | 0.0286493       | 3                              | 19a-3p; 19b-3p; 21-5p                                                                                        |
| 6                       | Arthritis Rheumatoid                               | 0.0286493       | 2                              | 19a-3p; 19b-3p                                                                                               |
| 7                       | Carcinoma Non-Small-Cell Lung                      | 0.0286493       | 4                              | 16-5p; 15a-5p; 221-3p; 21-5p                                                                                 |
| 8                       | Glioblastoma                                       | 0.0286493       | 6                              | 19a-3p; 221-3p; 21-5p; 92a-3p; 20a-5p; 26a-5p                                                                |
| 9                       | Lymphoma                                           | 0.0286493       | 6                              | 16-5p; 15a-5p; 21-5p; 9-5p; 20a-5p; 26a-5p                                                                   |
| 10                      | Monoclonal Gammopathy of Undetermined Significance | 0.0286493       | 4                              | 19a-3p; 19b-3p; 92a-3p; 25-3p                                                                                |
| 11                      | Multiple Myeloma                                   | 0.0286493       | 4                              | 19a-3p; 19b-3p; 92a-3p; 25-3p                                                                                |
| 12                      | Paraproteinemias                                   | 0.0286493       | 4                              | 19a-3p; 19b-3p; 92a-3p; 25-3p                                                                                |
| 13                      | Pheochromocytoma                                   | 0.0286493       | 2                              | 16-5p; 15a-5p                                                                                                |
| 14                      | Stomach Neoplasms                                  | 0.0286493       | 8                              | 16-5p; 148a-3p; 221-3p; 21-5p; 15b-5p; 106b-3p; 25-3p; 9-5p                                                  |
| 15                      | Infection                                          | 0.0365215       | 5                              | 16-5p; 15a-5p; 221-3p; 15b-5p; 26a-5p                                                                        |
| 16                      | Leukemia                                           | 0.0365215       | 8                              | 16-5p; 15a-5p; 19b-3p; 221-3p; 21-5p; 92a-3p; 9-5p; 26a-5p                                                   |
| 17                      | Anoxia                                             | 0.0411627       | 5                              | 16-5p; 21-5p; 15b-5p; 210-3p; 20a-5p                                                                         |
| <b>Diseases (MND)</b>   |                                                    |                 |                                |                                                                                                              |
| <b>No</b>               | <b>subcategory</b>                                 | <b>q-value</b>  | <b>number of miRs observed</b> | <b>hsa-miRs</b>                                                                                              |
| 1                       | Behcets disease                                    | 2.28413E-19     | 14                             | 19a-3p; 16-5p; 148a-3p; 15a-5p; 19b-3p; 221-3p; 21-5p; 15b-5p; 210-3p; 92a-3p; 106b-3p; 9-5p; 20a-5p; 26a-5p |
| 2                       | HIV-1                                              | 2.28413E-19     | 14                             | 19a-3p; 16-5p; 148a-3p; 15a-5p; 19b-3p; 221-3p; 21-5p; 15b-5p; 210-3p; 92a-3p; 106b-3p; 9-5p; 20a-5p; 26a-5p |
| 3                       | Leukemia. Biphenotypic. Acute                      | 2.28413E-19     | 14                             | 19a-3p; 16-5p; 148a-3p; 15a-5p; 19b-3p; 221-3p; 21-5p; 15b-5p; 210-3p; 92a-3p; 106b-3p; 9-5p; 20a-5p; 26a-5p |
| 4                       | Lymphoma. Extranodal NK-T-Cell                     | 2.28413E-19     | 14                             | 19a-3p; 16-5p; 148a-3p; 15a-5p; 19b-3p; 221-3p; 21-5p; 15b-5p; 210-3p; 92a-3p; 106b-3p; 9-5p; 20a-5p; 26a-5p |
| 5                       | Sjogrens syndrome                                  | 2.28413E-19     | 14                             | 19a-3p; 16-5p; 148a-3p; 15a-5p; 19b-3p; 221-3p; 21-5p; 15b-5p; 210-3p; 92a-3p; 106b-3p; 9-5p; 20a-5p; 26a-5p |
| 6                       | Endomyocardial fibrosis                            | 2.28413E-19     | 14                             | 19a-3p; 16-5p; 148a-3p; 15a-5p; 19b-3p; 221-3p; 21-5p; 210-3p; 92a-3p; 106b-3p; 25-3p; 9-5p; 20a-5p; 26a-5p  |
| 7                       | Nervous system disease                             | 2.28413E-19     | 14                             | 19a-3p; 16-5p; 148a-3p; 15a-5p; 19b-3p; 221-3p; 21-5p; 15b-5p; 210-3p; 92a-3p; 106b-3p; 9-5p; 20a-5p; 26a-5p |
| 8                       | Prion disease                                      | 2.28413E-19     | 14                             | 19a-3p; 16-5p; 148a-3p; 15a-5p; 19b-3p; 221-3p; 21-5p; 15b-5p; 210-3p; 92a-3p; 106b-3p; 9-5p; 20a-5p; 26a-5p |
| 9                       | Psoriatic arthritis                                | 2.28413E-19     | 14                             | 19a-3p; 16-5p; 148a-3p; 15a-5p; 19b-3p; 221-3p; 21-5p; 15b-5p; 210-3p; 92a-3p; 106b-3p; 9-5p; 20a-5p; 26a-5p |
| 10                      | Stomach disease                                    | 2.28413E-19     | 14                             | 19a-3p; 16-5p; 148a-3p; 15a-5p; 19b-3p; 221-3p; 21-5p; 15b-5p; 210-3p; 92a-3p; 106b-3p; 9-5p; 20a-5p; 26a-5p |

|    |                                |             |    |                                                                                                                         |
|----|--------------------------------|-------------|----|-------------------------------------------------------------------------------------------------------------------------|
| 11 | Esophagus                      | 2.38383E-19 | 14 | 19a-3p; 16-5p; 148a-3p; 15a-5p; 19b-3p; 221-3p; 21-5p; 15b-5p; 210-3p; 92a-3p; 106b-3p; 9-5p; 20a-5p; 26a-5p            |
| 12 | Myocardial Reperfusion Injury  | 2.38383E-19 | 14 | 19a-3p; 16-5p; 148a-3p; 15a-5p; 19b-3p; 221-3p; 21-5p; 15b-5p; 210-3p; 92a-3p; 106b-3p; 9-5p; 20a-5p; 26a-5p            |
| 13 | SARS Virus                     | 2.38383E-19 | 14 | 19a-3p; 16-5p; 148a-3p; 15a-5p; 19b-3p; 221-3p; 21-5p; 15b-5p; 210-3p; 92a-3p; 106b-3p; 9-5p; 20a-5p; 26a-5p            |
| 14 | Cowden disease                 | 2.61046E-19 | 14 | 19a-3p; 16-5p; 148a-3p; 15a-5p; 19b-3p; 221-3p; 21-5p; 15b-5p; 210-3p; 92a-3p; 106b-3p; 9-5p; 20a-5p; 26a-5p            |
| 15 | Intermediate coronary syndrome | 2.61046E-19 | 14 | 19a-3p; 16-5p; 148a-3p; 15a-5p; 19b-3p; 221-3p; 21-5p; 15b-5p; 210-3p; 92a-3p; 106b-3p; 9-5p; 20a-5p; 26a-5p            |
| 16 | Neuroendocrine carcinoma       | 2.61046E-19 | 14 | 19a-3p; 16-5p; 148a-3p; 15a-5p; 19b-3p; 221-3p; 21-5p; 15b-5p; 210-3p; 92a-3p; 106b-3p; 9-5p; 20a-5p; 26a-5p            |
| 17 | Endometrial carcinoma          | 3.91897E-19 | 14 | 19a-3p; 16-5p; 148a-3p; 15a-5p; 19b-3p; 221-3p; 21-5p; 15b-5p; 210-3p; 92a-3p; 106b-3p; 9-5p; 20a-5p; 26a-5p            |
| 18 | Neutropenia                    | 3.91897E-19 | 14 | 19a-3p; 16-5p; 148a-3p; 15a-5p; 19b-3p; 221-3p; 21-5p; 15b-5p; 210-3p; 92a-3p; 106b-3p; 9-5p; 20a-5p; 26a-5p            |
| 19 | Pulmonary fibrosis             | 3.91897E-19 | 14 | 19a-3p; 16-5p; 148a-3p; 15a-5p; 19b-3p; 221-3p; 21-5p; 15b-5p; 210-3p; 92a-3p; 106b-3p; 9-5p; 20a-5p; 26a-5p            |
| 20 | Lymphoma. Non-Hodgkin          | 7.31138E-19 | 16 | 19a-3p; 16-5p; 148a-3p; 15a-5p; 19b-3p; 221-3p; 21-5p; 9-3p; 15b-5p; 17-3p; 210-3p; 92a-3p; 25-3p; 9-5p; 20a-5p; 26a-5p |
| 21 | Atopic dermatitis              | 8.08309E-19 | 14 | 19a-3p; 16-5p; 148a-3p; 15a-5p; 19b-3p; 221-3p; 21-5p; 15b-5p; 210-3p; 92a-3p; 106b-3p; 9-5p; 20a-5p; 26a-5p            |
| 22 | AIDS Dementia Complex          | 9.93779E-19 | 15 | 19a-3p; 16-5p; 148a-3p; 15a-5p; 19b-3p; 221-3p; 21-5p; 9-3p; 15b-5p; 210-3p; 92a-3p; 106b-3p; 9-5p; 20a-5p; 26a-5p      |
| 23 | Brain Injuries                 | 1.24526E-18 | 14 | 19a-3p; 16-5p; 148a-3p; 15a-5p; 19b-3p; 221-3p; 21-5p; 15b-5p; 210-3p; 92a-3p; 106b-3p; 9-5p; 20a-5p; 26a-5p            |
| 24 | Cardiovascular Diseases        | 1.5389E-18  | 14 | 19a-3p; 16-5p; 148a-3p; 15a-5p; 19b-3p; 221-3p; 21-5p; 15b-5p; 210-3p; 92a-3p; 106b-3p; 9-5p; 20a-5p; 26a-5p            |

### CNS DLBCL-specific CSF microRNAs in other selected CNS disorders

| subcategory                                    | q-value     | number of miRs observed | hsa-miRs                                                                                                                         |
|------------------------------------------------|-------------|-------------------------|----------------------------------------------------------------------------------------------------------------------------------|
| Lymphoproliferative Disorders                  | 6.641E-18   | 13                      | 19a-3p; 148a-3p; 15a-5p; 19b-3p; 221-3p; 21-5p; 15b-5p; 210-3p; 92a-3p; 106b-3p; 9-5p; 20a-5p; 26a-5p                            |
| Disease of metabolism                          | 1.26073E-17 | 13                      | 19a-3p; 16-5p; 148a-3p; 15a-5p; 19b-3p; 221-3p; 21-5p; 15b-5p; 210-3p; 106b-3p; 9-5p; 20a-5p; 26a-5p                             |
| Precursor Cell Lymphoblastic Leukemia-Lymphoma | 5.72176E-16 | 16                      | 19a-3p; 16-5p; 148a-3p; 15a-5p; 19b-3p; 221-3p; 21-5p; 9-3p; 15b-5p; 17-3p; 210-3p; 92a-3p; 106b-3p; 9-5p; 20a-5p; 26a-5p        |
| B-cell lymphoma                                | 2.71217E-15 | 17                      | 19a-3p; 16-5p; 148a-3p; 15a-5p; 19b-3p; 221-3p; 21-5p; 9-3p; 15b-5p; 17-3p; 210-3p; 92a-3p; 106b-3p; 25-3p; 9-5p; 20a-5p; 26a-5p |
| Burkitt lymphoma                               | 3.73951E-15 | 16                      | 19a-3p; 16-5p; 148a-3p; 15a-5p; 19b-3p; 221-3p; 21-5p; 15b-5p; 17-3p; 210-3p; 92a-3p; 106b-3p; 25-3p; 9-5p; 20a-5p; 26a-5p       |
| Infection                                      | 8.38443E-15 | 14                      | 19a-3p; 16-5p; 148a-3p; 15a-5p; 19b-3p; 221-3p; 21-5p; 15b-5p; 210-3p; 92a-3p; 106b-3p; 9-5p; 20a-5p; 26a-5p                     |
| Cerebral Hemorrhage                            | 1.8654E-14  | 11                      | 19a-3p; 16-5p; 148a-3p; 15a-5p; 19b-3p; 221-3p; 21-5p; 210-3p; 92a-3p; 9-5p; 20a-5p                                              |

|                                                  |             |    |                                                                                                                                    |
|--------------------------------------------------|-------------|----|------------------------------------------------------------------------------------------------------------------------------------|
| Brain ischemia                                   | 1.8654E-14  | 11 | 16-5p; 148a-3p; 15a-5p; 19b-3p; 221-3p; 21-5p; 15b-5p; 106b-3p; 9-5p; 20a-5p; 26a-5p                                               |
| Central nervous system disease                   | 1.8654E-14  | 11 | 16-5p; 148a-3p; 15a-5p; 221-3p; 21-5p; 15b-5p; 210-3p; 106b-3p; 9-5p; 20a-5p; 26a-5p                                               |
| Hypoxia-Ischemia. Brain                          | 2.73846E-14 | 11 | 16-5p; 148a-3p; 15a-5p; 221-3p; 21-5p; 15b-5p; 210-3p; 106b-3p; 9-5p; 20a-5p; 26a-5p                                               |
| Lymphoma. Primary Effusion                       | 2.73846E-14 | 11 | 19a-3p; 16-5p; 148a-3p; 15a-5p; 19b-3p; 221-3p; 21-5p; 210-3p; 92a-3p; 9-5p; 20a-5p                                                |
| Cerebral infarction                              | 2.73846E-14 | 11 | 19a-3p; 16-5p; 148a-3p; 15a-5p; 19b-3p; 221-3p; 21-5p; 210-3p; 92a-3p; 9-5p; 20a-5p                                                |
| Lipid metabolism disorder                        | 4.90958E-14 | 11 | 16-5p; 148a-3p; 15a-5p; 221-3p; 21-5p; 15b-5p; 210-3p; 106b-3p; 9-5p; 20a-5p; 26a-5p                                               |
| Diffuse large B-cell lymphoma                    | 1.53287E-13 | 12 | 19a-3p; 16-5p; 148a-3p; 15a-5p; 19b-3p; 221-3p; 21-5p; 210-3p; 92a-3p; 9-5p; 20a-5p; 26a-5p                                        |
| Inflammation                                     | 2.13822E-13 | 11 | 19a-3p; 16-5p; 148a-3p; 15a-5p; 19b-3p; 221-3p; 21-5p; 92a-3p; 106b-3p; 9-5p; 20a-5p                                               |
| Brain cancer                                     | 8.02872E-13 | 11 | 19a-3p; 16-5p; 148a-3p; 15a-5p; 19b-3p; 221-3p; 21-5p; 210-3p; 92a-3p; 106b-3p; 20a-5p                                             |
| Precursor B-Cell Lymphoblastic Leukemia-Lymphoma | 1.49627E-12 | 10 | 19a-3p; 16-5p; 148a-3p; 19b-3p; 221-3p; 21-5p; 210-3p; 92a-3p; 9-5p; 20a-5p                                                        |
| Leukemia. B-Cell                                 | 2.84269E-09 | 8  | 19a-3p; 148a-3p; 221-3p; 21-5p; 210-3p; 106b-3p; 9-5p; 20a-5p                                                                      |
| lymphoma                                         | 3.56791E-09 | 16 | 19a-3p; 16-5p; 148a-3p; 15a-5p; 19b-3p; 221-3p; 21-5p; 9-3p; 15b-5p; 17-3p; 92a-3p; 106b-3p; 25-3p; 9-5p; 20a-5p; 26a-5p           |
| Lymphoblastoid                                   | 7.0076E-09  | 9  | 16-5p; 15a-5p; 21-5p; 9-3p; 92a-3p; 25-3p; 9-5p; 20a-5p; 26a-5p                                                                    |
| Brain disease                                    | 2.20671E-08 | 17 | 19a-3p; 16-5p; 148a-3p; 15a-5p; 19b-3p; 221-3p; 423-5p; 21-5p; 15b-5p; 17-3p; 210-3p; 92a-3p; 106b-3p; 25-3p; 9-5p; 20a-5p; 26a-5p |
| Central nervous system lymphoma                  | 2.38101E-08 | 6  | 148a-3p; 19b-3p; 21-5p; 92a-3p; 9-5p; 20a-5p                                                                                       |

\*p-value after the Benjamini-Hochberg adjustment
