# Supplementary material for: A Set of 17 microRNAs Common for Brain and Cerebrospinal Fluid Differentiates Primary Central Nervous System Lymphoma from Non-Malignant Brain Tumors
Source: MDPI journal article supplement (doi:10.3390/biom11091395), 2021-09-21
Supplement: s1 [file s1]

Supplementary Table S13

CNS DLBCL-specific FFPET microRNAs and diseases. Lymphoma and central nervous system diseases are marked bold.

| <i>Diseases (MNDR)</i> |                              |          |                         |                                                                                                                                                                                                                                                                                                                                                                                                                                                                                                                                                                                                                                                                                                                                                                                                                                                                                                                                                                                                                                                                                                                                                                                                                                                                                                                                                                                           |
|------------------------|------------------------------|----------|-------------------------|-------------------------------------------------------------------------------------------------------------------------------------------------------------------------------------------------------------------------------------------------------------------------------------------------------------------------------------------------------------------------------------------------------------------------------------------------------------------------------------------------------------------------------------------------------------------------------------------------------------------------------------------------------------------------------------------------------------------------------------------------------------------------------------------------------------------------------------------------------------------------------------------------------------------------------------------------------------------------------------------------------------------------------------------------------------------------------------------------------------------------------------------------------------------------------------------------------------------------------------------------------------------------------------------------------------------------------------------------------------------------------------------|
| No                     | subcategory                  | q-value* | number of miRs observed | hsa-miRs                                                                                                                                                                                                                                                                                                                                                                                                                                                                                                                                                                                                                                                                                                                                                                                                                                                                                                                                                                                                                                                                                                                                                                                                                                                                                                                                                                                  |
| 1                      | osteosarcoma                 | 1.47E-85 | 165                     | 92a-3p; 106b-3p; 17-5p; 182-5p; 20a-5p; 155-5p; 96-5p; 18a-5p; 19a-3p; 19b-1-5p; hsa-let-7c-5p; 17-3p; 142-5p; 183-5p; 15b-3p; hsa-let-7e-5p; 142-3p; 1260a; 744-5p; 16-2-3p; 93-5p; 200c-3p; 19b-3p; 582-5p; 130b-5p; 497-5p; 146a-5p; 766-3p; 181c-5p; 106b-5p; 15b-5p; 130b-3p; 25-3p; 210-3p; 9-5p; 486-5p; 425-5p; 16-5p; 154-5p; 192-5p; 30d-5p; 381-3p; 1185-5p; 376a-3p; 376c-3p; 628-3p; 124-3p; 30a-5p; 186-5p; 9-3p; 127-5p; 299-5p; 31-5p; 625-3p; 451a; 539-5p; 769-5p; 505-3p; 191-5p; 491-5p; 125a-5p; 181c-3p; 195-5p; 203a-3p; 379-5p; 128-3p; 143-3p; hsa-let-7a-5p; 218-5p; 135a-5p; 423-5p; 543; 485-3p; 26b-3p; 487b-3p; 148a-3p; 21-3p; 129-5p; 29b-1-5p; 129-1-3p; 30c-5p; 30b-5p; 99a-5p; 628-5p; 144-3p; 654-3p; 31-3p; 93-3p; 329-3p; 132-3p; 484; 130a-3p; 134-5p; 935; 98-5p; 149-5p; 382-3p; 409-5p; 758-3p; 495-3p; 15a-5p; 487a-3p; 95-3p; 551b-3p; 361-3p; 194-5p; 411-5p; 433-3p; 26a-5p; 296-5p; 106a-5p; 139-5p; 323a-3p; 423-3p; 425-3p; 1-3p; 132-5p; 335-3p; 144-5p; 33b-5p; 181d-5p; 18b-5p; 378a-3p; 629-5p; 590-5p; 432-5p; 7-5p; 138-5p; 127-3p; 409-3p; 339-5p; 382-5p; 885-5p; 27b-3p; 340-3p; 204-5p; 27a-3p; 383-5p; 769-3p; 494-3p; 411-3p; 376b-3p; 139-3p; 32-5p; 21-5p; 590-3p; 20b-5p; 136-5p; 340-5p; 153-3p; 99b-3p; 338-5p; 454-3p; 23b-3p; 331-5p; 28-3p; 145-5p; 370-3p; 125b-5p; 221-5p; 99b-5p; 126-3p; 92b-3p; 770-5p; 1249-3p |
| 2                      | carcinoma. ductal. breast    | 5E-74    | 155                     | 92a-3p; 17-5p; 182-5p; 20a-5p; 155-5p; 96-5p; 18a-5p; 19a-3p; 19b-1-5p; hsa-let-7c-5p; 17-3p; 142-5p; 183-5p; 15b-3p; hsa-let-7e-5p; 142-3p; 92a-1-5p; 16-2-3p; 93-5p; 200c-3p; 19b-3p; 130b-5p; 497-5p; 766-3p; 181c-5p; 106b-5p; 15b-5p; 130b-3p; 3615; 99a-3p; 210-3p; 9-5p; 486-5p; 425-5p; 16-5p; 125b-2-3p; 154-5p; 192-5p; 381-3p; 376c-3p; 30a-5p; 410-3p; 186-5p; 9-3p; 127-5p; 299-5p; 625-3p; 655-3p; 451a; 539-5p; 769-5p; 505-3p; 191-5p; 136-3p; 154-3p; 491-5p; 125a-5p; 181c-3p; 195-5p; 203a-3p; 369-5p; 379-5p; 128-3p; 143-3p; 218-5p; 543; 485-3p; 26b-3p; 487b-3p; 148a-3p; 21-3p; 129-5p; 29b-1-5p; 656-3p; 378c; 30c-5p; 30b-5p; 99a-5p; 628-5p; 144-3p; 654-3p; 101-5p; 93-3p; 329-3p; 132-3p; 484; 130a-3p; 3613-5p; 134-5p; 98-5p; 625-5p; 409-5p; 758-3p; 495-3p; 15a-5p; 376a-5p; 551b-3p; 194-5p; 411-5p; 433-3p; 26a-5p; 296-5p; 106a-5p; 139-5p; 323a-3p; 423-3p; 425-3p; 1-3p; 3065-5p; 335-3p; 144-5p; 33b-5p; 181d-5p; 378a-3p; 629-5p; 590-5p; 487a-5p; 432-5p; 7-5p; 320d; 127-3p; 532-3p; 187-3p; 409-3p; 382-5p; 340-3p; 204-5p; 27a-3p; 769-3p; 494-3p; 411-3p; 376b-3p; 139-3p; 32-5p; hsa-let-7b-5p; 21-5p; 590-3p; 20b-5p; 136-5p; 30a-3p; 340-5p; 99b-3p; 454-3p; 23b-3p; 331-5p; 28-3p; 145-5p; 370-3p; 125b-5p; 99b-5p; 126-3p; 323b-3p; 92b-3p; 1296-5p; 1249-3p                                                                            |
| 3                      | bladder urothelial carcinoma | 5E-74    | 153                     | 92a-3p; 106b-3p; 17-5p; 182-5p; 20a-5p; 96-5p; 18a-5p; 19a-3p; 19b-1-5p; hsa-let-7c-5p; 17-3p; 4521; 183-5p; 15b-3p; 142-3p; 92a-1-5p; 16-2-3p; 93-5p; 200c-3p; 19b-3p; 582-5p; 130b-5p; 497-5p; 766-3p; 181c-5p; 106b-5p; 15b-5p; 130b-3p; 25-3p; 3615; 99a-3p; 210-3p; 486-5p; 425-5p; 16-5p; 125b-2-3p; 154-5p; 192-5p; 30d-5p; 381-3p; 376a-3p; 376c-3p; 30a-5p; 410-3p; 127-5p; 299-5p; 31-5p; 655-3p; 451a; 539-5p; 505-3p; 191-5p; 136-3p; 154-3p; 125a-5p; 181c-3p; 195-5p; 203a-3p; 369-5p; 379-5p; 143-3p; hsa-let-7a-5p; 218-5p; 423-5p; 543; 485-3p; 26b-3p; 487b-3p; 148a-3p; 21-3p; 129-5p; 656-3p; 378c; 30c-5p; 30b-5p; 99a-5p; 628-5p; 144-3p; 654-3p; 31-3p; 93-3p; 329-3p; 132-3p; 484; 130a-3p; 3613-5p; 134-5p; 98-5p; 149-5p; 409-5p; 758-3p; 495-3p; 15a-5p; 376a-5p; 487a-3p; 551b-3p; 194-5p; 411-5p; 433-3p; 26a-5p; 106a-5p; 139-5p; 423-3p; 425-3p; 320c; 1-3p; 132-5p; 3065-5p; 335-3p; 144-5p; 378a-3p; 629-5p; 590-5p; 487a-5p; 432-5p; 138-5p; 127-3p; 532-3p; 187-3p; 409-3p; 339-5p; 382-5p; 27b-3p; 340-3p; 204-5p; 27a-3p; 769-3p; 494-3p; 369-3p; 411-3p; 502-3p; 376b-3p; 139-3p; 32-5p; 21-5p; 590-3p; 136-5p; 30a-3p; 340-5p; 378d; 338-5p; 454-3p; 23b-3p; 331-5p; 28-3p; 145-5p; 370-3p; 504-5p; 125b-5p; 221-5p; 126-3p; 92b-3p; 1249-3p                                                                                                       |

|   |                            |          |     |                                                                                                                                                                                                                                                                                                                                                                                                                                                                                                                                                                                                                                                                                                                                                                                                                                                                                                                                                                                                                                                                                                                                                                                                                                                                                                                                                                                                                                                                                                                                                                    |
|---|----------------------------|----------|-----|--------------------------------------------------------------------------------------------------------------------------------------------------------------------------------------------------------------------------------------------------------------------------------------------------------------------------------------------------------------------------------------------------------------------------------------------------------------------------------------------------------------------------------------------------------------------------------------------------------------------------------------------------------------------------------------------------------------------------------------------------------------------------------------------------------------------------------------------------------------------------------------------------------------------------------------------------------------------------------------------------------------------------------------------------------------------------------------------------------------------------------------------------------------------------------------------------------------------------------------------------------------------------------------------------------------------------------------------------------------------------------------------------------------------------------------------------------------------------------------------------------------------------------------------------------------------|
| 4 | renal clear cell carcinoma | 5E-74    | 158 | <p>92a-3p; 106b-3p; 17-5p; 182-5p; 20a-5p; 155-5p; 96-5p; 18a-5p; 19a-3p; 19b-1-5p; hsa-let-7c-5p; 17-3p; 142-5p; 183-5p; 15b-3p; hsa-let-7e-5p; 142-3p; 744-5p; 16-2-3p; 93-5p; 200c-3p; 19b-3p; 130b-5p; 497-5p; 146a-5p; 766-3p; 181c-5p; 106b-5p; 15b-5p; 130b-3p; 25-3p; 3615; 99a-3p; 210-3p; 9-5p; 486-5p; 425-5p; 16-5p; 154-5p; 192-5p; 30d-5p; 381-3p; 376c-3p; 124-3p; 30a-5p; 486-3p; 186-5p; 127-5p; 31-5p; 625-3p; 451a; 539-5p; 769-5p; 505-3p; 191-5p; 136-3p; 125a-5p; 181c-3p; 195-5p; 203a-3p; 369-5p; 379-5p; 128-3p; 143-3p; hsa-let-7a-5p; 218-5p; 135a-5p; 485-3p; 26b-3p; 487b-3p; 148a-3p; 21-3p; 129-5p; 29b-1-5p; 378c; 30c-5p; 1248; 30b-5p; 99a-5p; 628-5p; 144-3p; 654-3p; 101-5p; 93-3p; 484; 130a-3p; 3613-5p; 134-5p; 935; 149-5p; 625-5p; 409-5p; 758-3p; 495-3p; 15a-5p; 95-3p; 551b-3p; 361-3p; 194-5p; 411-5p; 26a-5p; 296-5p; 106a-5p; 139-5p; 323a-3p; 423-3p; 320c; 1-3p; 132-5p; 3065-5p; 335-3p; 144-5p; 33b-5p; 181d-5p; 378a-3p; 629-5p; 590-5p; 320d; 138-5p; 127-3p; 532-3p; 187-3p; 339-5p; 382-5p; 885-5p; 27b-3p; 340-3p; 204-5p; 27a-3p; 494-3p; 502-3p; 139-3p; 32-5p; hsa-let-7b-5p; 21-5p; 590-3p; 20b-5p; 136-5p; 30a-3p; 340-5p; 378d; 153-3p; 99b-3p; 338-5p; 454-3p; 23b-3p; 331-5p; 28-3p; 145-5p; 370-3p; 125b-5p; 221-5p; 99b-5p; 126-3p; 323b-3p; 92b-3p; 1296-5p; 1249-3p</p>                                                                                                                                                                                                                        |
| 5 | lung cancer                | 2.74E-73 | 184 | <p>92a-3p; 106b-3p; 17-5p; 182-5p; 20a-5p; 155-5p; 96-5p; 18a-5p; 1246; 19a-3p; hsa-let-7c-5p; 17-3p; 1290; 142-5p; 183-5p; hsa-let-7e-5p; 142-3p; 92a-1-5p; 744-5p; 873-5p; 93-5p; 200c-3p; 19b-3p; 582-5p; 130b-5p; 497-5p; 146a-5p; 766-3p; 181c-5p; 106b-5p; 15b-5p; 130b-3p; 25-3p; 99a-3p; 210-3p; 9-5p; 486-5p; 425-5p; 16-5p; 125b-2-3p; 154-5p; 192-5p; 30d-5p; 381-3p; 376a-3p; 376c-3p; 628-3p; 1285-3p; 124-3p; 30a-5p; 486-3p; 186-5p; 9-3p; 127-5p; 299-5p; 31-5p; 625-3p; 655-3p; 451a; 539-5p; 769-5p; 505-3p; 191-5p; 154-3p; 491-5p; 125a-5p; 181c-3p; 195-5p; 203a-3p; 369-5p; 379-5p; 128-3p; 485-5p; 143-3p; hsa-let-7a-5p; 218-5p; 135a-5p; 423-5p; 543; 485-3p; 26b-3p; 487b-3p; 148a-3p; 129-5p; 29b-1-5p; 129-1-3p; 30c-5p; 30b-5p; 99a-5p; 380-3p; 628-5p; 144-3p; 654-3p; 101-5p; 31-3p; 93-3p; 132-3p; 484; 130a-3p; 134-5p; 935; 98-5p; 149-5p; 625-5p; 409-5p; 758-3p; 495-3p; 15a-5p; 376a-5p; 487a-3p; 95-3p; 551b-3p; 361-3p; 194-5p; 411-5p; 433-3p; 129-2-3p; 26a-5p; 296-5p; 106a-5p; 139-5p; 323a-3p; 423-3p; 425-3p; 1-3p; 132-5p; 144-5p; 33b-5p; 181d-5p; 18b-5p; 378a-3p; 629-5p; 590-5p; 487a-5p; 432-5p; 7-5p; 320d; 138-5p; 127-3p; 532-3p; 187-3p; 409-3p; 339-5p; 382-5p; 885-5p; 27b-3p; 340-3p; 204-5p; 27a-3p; 383-5p; 769-3p; 494-3p; 369-3p; 502-3p; 376b-3p; 139-3p; 32-5p; hsa-let-7b-5p; 21-5p; 590-3p; 20b-5p; 136-5p; 30a-3p; 340-5p; 153-3p; 99b-3p; 338-5p; 454-3p; 23b-3p; 331-5p; 28-3p; 211-5p; 145-5p; 370-3p; 504-5p; 125b-5p; 92b-5p; 221-5p; 99b-5p; 126-3p; 92b-3p; 770-5p; 1296-5p; 1249-3p</p> |
| 6 | prostate adenocarcinoma    | 6.09E-73 | 145 | <p>92a-3p; 17-5p; 182-5p; 20a-5p; 96-5p; 18a-5p; 19a-3p; 19b-1-5p; hsa-let-7c-5p; 17-3p; 183-5p; 15b-3p; hsa-let-7e-5p; 92a-1-5p; 16-2-3p; 93-5p; 200c-3p; 19b-3p; 582-5p; 130b-5p; 766-3p; 181c-5p; 106b-5p; 15b-5p; 130b-3p; 25-3p; 99a-3p; 210-3p; 9-5p; 486-5p; 425-5p; 125b-2-3p; 154-5p; 192-5p; 30d-5p; 381-3p; 376c-3p; 30a-5p; 410-3p; 186-5p; 9-3p; 127-5p; 299-5p; 625-3p; 655-3p; 451a; 539-5p; 505-3p; 191-5p; 136-3p; 154-3p; 491-5p; 125a-5p; 181c-3p; 203a-3p; 379-5p; 128-3p; 143-3p; hsa-let-7a-5p; 218-5p; 135a-5p; 423-5p; 487b-3p; 148a-3p; 21-3p; 129-5p; 29b-1-5p; 378c; 30c-5p; 30b-5p; 99a-5p; 628-5p; 144-3p; 654-3p; 101-5p; 31-3p; 93-3p; 132-3p; 484; 130a-3p; 3613-5p; 134-5p; 98-5p; 149-5p; 758-3p; 495-3p; 15a-5p; 95-3p; 194-5p; 411-5p; 26a-5p; 296-5p; 106a-5p; 139-5p; 323a-3p; 423-3p; 425-3p; 1-3p; 3065-5p; 144-5p; 33b-5p; 181d-5p; 18b-5p; 378a-3p; 629-5p; 590-5p; 432-5p; 7-5p; 320d; 127-3p; 532-3p; 187-3p; 409-3p; 339-5p; 27b-3p; 340-3p; 204-5p; 27a-3p; 383-5p; 769-3p; 494-3p; 369-3p; 411-3p; 139-3p; 32-5p; hsa-let-7b-5p; 21-5p; 20b-5p; 136-5p; 30a-3p; 340-5p; 378d; 153-3p; 99b-3p; 338-5p; 454-3p; 23b-3p; 145-5p; 370-3p; 221-5p; 99b-5p; 126-3p; 323b-3p; 1296-5p; 1249-3p</p>                                                                                                                                                                                                                                                                                                                         |

|   |                                |          |     |                                                                                                                                                                                                                                                                                                                                                                                                                                                                                                                                                                                                                                                                                                                                                                                                                                                                                                                                                                                                                                                                                                                                                                                                                                                                                                                                                                                                                                                                                                                                                                                                 |
|---|--------------------------------|----------|-----|-------------------------------------------------------------------------------------------------------------------------------------------------------------------------------------------------------------------------------------------------------------------------------------------------------------------------------------------------------------------------------------------------------------------------------------------------------------------------------------------------------------------------------------------------------------------------------------------------------------------------------------------------------------------------------------------------------------------------------------------------------------------------------------------------------------------------------------------------------------------------------------------------------------------------------------------------------------------------------------------------------------------------------------------------------------------------------------------------------------------------------------------------------------------------------------------------------------------------------------------------------------------------------------------------------------------------------------------------------------------------------------------------------------------------------------------------------------------------------------------------------------------------------------------------------------------------------------------------|
| 7 | pancreatic adenocarcinoma      | 6.81E-71 | 158 | <p>92a-3p; 106b-3p; 17-5p; 182-5p; 20a-5p; 155-5p; 18a-5p; 1246; 19b-1-5p; hsa-let-7c-5p; 17-3p; 142-5p; 183-5p; 15b-3p; hsa-let-7e-5p; 142-3p; 1260b; 92a-1-5p; 744-5p; 16-2-3p; 93-5p; 130b-5p; 497-5p; 146a-5p; 766-3p; 106b-5p; 15b-5p; 130b-3p; 25-3p; 210-3p; 486-5p; 425-5p; 16-5p; 125b-2-3p; 154-5p; 192-5p; 30d-5p; 1185-5p; 376a-3p; 376c-3p; 628-3p; 1285-3p; 30a-5p; 410-3p; 486-3p; 186-5p; 127-5p; 299-5p; 31-5p; 625-3p; 655-3p; 451a; 539-5p; 769-5p; 505-3p; 191-5p; 136-3p; 154-3p; 125a-5p; 181c-3p; 203a-3p; 369-5p; 379-5p; 128-3p; 485-5p; 143-3p; 135a-5p; 423-5p; 543; 485-3p; 26b-3p; 487b-3p; 148a-3p; 21-3p; 129-5p; 29b-1-5p; 129-1-3p; 656-3p; 378c; 30b-5p; 99a-5p; 380-3p; 628-5p; 144-3p; 654-3p; 101-5p; 31-3p; 93-3p; 329-3p; 132-3p; 484; 134-5p; 935; 98-5p; 382-3p; 409-5p; 495-3p; 15a-5p; 376a-5p; 487a-3p; 95-3p; 551b-3p; 194-5p; 411-5p; 433-3p; 129-2-3p; 106a-5p; 139-5p; 323a-3p; 423-3p; 132-5p; 3065-5p; 335-3p; 144-5p; 181d-5p; 18b-5p; 378a-3p; 629-5p; 590-5p; 487a-5p; 432-5p; 7-5p; 320d; 138-5p; 127-3p; 532-3p; 187-3p; 409-3p; 339-5p; 382-5p; 204-5p; 769-3p; 494-3p; 369-3p; 411-3p; 502-3p; 139-3p; hsa-let-7b-5p; 21-5p; 590-3p; 136-5p; 30a-3p; 153-3p; 99b-3p; 338-5p; 454-3p; 23b-3p; 331-5p; 28-3p; 145-5p; 370-3p; 125b-5p; 221-5p; 99b-5p; 126-3p; 323b-3p; 92b-3p; 770-5p</p>                                                                                                                                                                                                                                               |
| 8 | papillary renal cell carcinoma | 7.51E-71 | 156 | <p>92a-3p; 106b-3p; 17-5p; 182-5p; 20a-5p; 155-5p; 96-5p; 18a-5p; 19a-3p; 19b-1-5p; hsa-let-7c-5p; 17-3p; 142-5p; 183-5p; 15b-3p; hsa-let-7e-5p; 142-3p; 744-5p; 16-2-3p; 93-5p; 200c-3p; 19b-3p; 130b-5p; 497-5p; 146a-5p; 766-3p; 181c-5p; 106b-5p; 15b-5p; 130b-3p; 25-3p; 3615; 99a-3p; 210-3p; 9-5p; 486-5p; 425-5p; 16-5p; 125b-2-3p; 154-5p; 192-5p; 30d-5p; 381-3p; 376c-3p; 628-3p; 30a-5p; 410-3p; 486-3p; 186-5p; 127-5p; 299-5p; 31-5p; 625-3p; 451a; 539-5p; 769-5p; 505-3p; 191-5p; 136-3p; 491-5p; 125a-5p; 181c-3p; 195-5p; 203a-3p; 369-5p; 379-5p; 128-3p; 143-3p; 218-5p; 135a-5p; 423-5p; 485-3p; 487b-3p; 148a-3p; 21-3p; 129-5p; 29b-1-5p; 30b-5p; 99a-5p; 628-5p; 144-3p; 654-3p; 101-5p; 31-3p; 93-3p; 132-3p; 484; 3613-5p; 134-5p; 935; 98-5p; 625-5p; 409-5p; 758-3p; 495-3p; 15a-5p; 551b-3p; 361-3p; 194-5p; 411-5p; 26a-5p; 296-5p; 106a-5p; 139-5p; 323a-3p; 423-3p; 425-3p; 320c; 1-3p; 132-5p; 3065-5p; 144-5p; 33b-5p; 181d-5p; 629-5p; 590-5p; 432-5p; 127-3p; 532-3p; 187-3p; 409-3p; 339-5p; 382-5p; 885-5p; 27b-3p; 340-3p; 204-5p; 27a-3p; 769-3p; 494-3p; 369-3p; 502-3p; 139-3p; hsa-let-7b-5p; 21-5p; 590-3p; 20b-5p; 136-5p; 340-5p; 378d; 153-3p; 99b-3p; 338-5p; 454-3p; 23b-3p; 331-5p; 28-3p; 211-5p; 145-5p; 370-3p; 125b-5p; 126-3p; 323b-3p; 92b-3p; 1296-5p; 1249-3p</p>                                                                                                                                                                                                                                                                     |
| 9 | glioblastoma                   | 7.36E-70 | 189 | <p>92a-3p; 106b-3p; 17-5p; 182-5p; 20a-5p; 155-5p; 96-5p; 18a-5p; 1246; 19a-3p; 19b-1-5p; hsa-let-7c-5p; 17-3p; 1290; 142-5p; 183-5p; 15b-3p; hsa-let-7e-5p; 142-3p; 1260a; 92a-1-5p; 744-5p; 873-5p; 93-5p; 200c-3p; 19b-3p; 582-5p; 130b-5p; 497-5p; 146a-5p; 181c-5p; 106b-5p; 15b-5p; 130b-3p; 25-3p; 99a-3p; 210-3p; 9-5p; 486-5p; 425-5p; 16-5p; 125b-2-3p; 154-5p; 192-5p; 30d-5p; 381-3p; 1185-5p; 376a-3p; 376c-3p; 628-3p; 124-3p; 30a-5p; 410-3p; 486-3p; 186-5p; 9-3p; 299-5p; 31-5p; 625-3p; 655-3p; 451a; 539-5p; 505-3p; 191-5p; 154-3p; 491-5p; 125a-5p; 181c-3p; 195-5p; 203a-3p; 369-5p; 379-5p; 128-3p; 485-5p; 143-3p; hsa-let-7a-5p; 218-5p; 4286; 135a-5p; 423-5p; 543; 485-3p; 26b-3p; 487b-3p; 148a-3p; 21-3p; 129-5p; 129-1-3p; 656-3p; 30c-5p; 1248; 30b-5p; 99a-5p; 380-3p; 628-5p; 144-3p; 654-3p; 93-3p; 329-3p; 132-3p; 484; 130a-3p; 134-5p; 935; 98-5p; 149-5p; 382-3p; 625-5p; 378i; 409-5p; 495-3p; 15a-5p; 376a-5p; 487a-3p; 95-3p; 551b-3p; 361-3p; 194-5p; 411-5p; 433-3p; 129-2-3p; 26a-5p; 296-5p; 106a-5p; 139-5p; 323a-3p; 423-3p; 425-3p; 320c; 1-3p; 132-5p; 144-5p; 181d-5p; 18b-5p; 378a-3p; 629-5p; 432-5p; 7-5p; 124-5p; 320d; 138-5p; 127-3p; 532-3p; 187-3p; 409-3p; 339-5p; 382-5p; 885-5p; 27b-3p; 340-3p; 204-5p; 27a-3p; 383-5p; 769-3p; 494-3p; 369-3p; 411-3p; 502-3p; 376b-3p; 139-3p; 32-5p; hsa-let-7b-5p; 21-5p; 590-3p; 20b-5p; 136-5p; 30a-3p; 340-5p; 378d; 153-3p; 99b-3p; 338-5p; 454-3p; 23b-3p; 28-3p; 211-5p; 145-5p; 370-3p; 504-5p; 125b-5p; 92b-5p; 221-5p; 99b-5p; 126-3p; 323b-3p; 92b-3p; 770-5p; 1296-5p; 1249-3p</p> |

|    |                                       |          |     |                                                                                                                                                                                                                                                                                                                                                                                                                                                                                                                                                                                                                                                                                                                                                                                                                                                                                                                                                                                                                                                                                                                                                                                                                                                                                                                                                                                                                                                                                                                           |
|----|---------------------------------------|----------|-----|---------------------------------------------------------------------------------------------------------------------------------------------------------------------------------------------------------------------------------------------------------------------------------------------------------------------------------------------------------------------------------------------------------------------------------------------------------------------------------------------------------------------------------------------------------------------------------------------------------------------------------------------------------------------------------------------------------------------------------------------------------------------------------------------------------------------------------------------------------------------------------------------------------------------------------------------------------------------------------------------------------------------------------------------------------------------------------------------------------------------------------------------------------------------------------------------------------------------------------------------------------------------------------------------------------------------------------------------------------------------------------------------------------------------------------------------------------------------------------------------------------------------------|
| 10 | head and neck squamous cell carcinoma | 2.41E-68 | 153 | 92a-3p; 106b-3p; 17-5p; 182-5p; 20a-5p; 155-5p; 96-5p; 18a-5p; 19a-3p; 19b-1-5p; hsa-let-7c-5p; 4521; 183-5p; 15b-3p; hsa-let-7e-5p; 142-3p; 92a-1-5p; 16-2-3p; 93-5p; 200c-3p; 19b-3p; 130b-5p; 497-5p; 766-3p; 181c-5p; 106b-5p; 15b-5p; 4449; 130b-3p; 25-3p; 3615; 99a-3p; 210-3p; 9-5p; 486-5p; 425-5p; 16-5p; 125b-2-3p; 154-5p; 381-3p; 376a-3p; 376c-3p; 628-3p; 30a-5p; 410-3p; 486-3p; 186-5p; 127-5p; 299-5p; 31-5p; 655-3p; 451a; 539-5p; 769-5p; 505-3p; 191-5p; 136-3p; 154-3p; 491-5p; 125a-5p; 195-5p; 203a-3p; 369-5p; 379-5p; 128-3p; 143-3p; 218-5p; 423-5p; 543; 26b-3p; 487b-3p; 148a-3p; 21-3p; 29b-1-5p; 656-3p; 378c; 30c-5p; 30b-5p; 99a-5p; 144-3p; 654-3p; 101-5p; 31-3p; 93-3p; 329-3p; 132-3p; 484; 130a-3p; 3613-5p; 134-5p; 98-5p; 149-5p; 382-3p; 758-3p; 495-3p; 15a-5p; 376a-5p; 487a-3p; 95-3p; 361-3p; 411-5p; 433-3p; 26a-5p; 296-5p; 106a-5p; 139-5p; 423-3p; 1-3p; 144-5p; 378a-3p; 590-5p; 487a-5p; 432-5p; 7-5p; 320d; 138-5p; 127-3p; 532-3p; 187-3p; 409-3p; 339-5p; 382-5p; 27b-3p; 204-5p; 27a-3p; 769-3p; 494-3p; 369-3p; 411-3p; 502-3p; 376b-3p; 139-3p; 32-5p; 21-5p; 136-5p; 30a-3p; 340-5p; 378d; 153-3p; 99b-3p; 338-5p; 454-3p; 23b-3p; 331-5p; 28-3p; 145-5p; 370-3p; 125b-5p; 221-5p; 99b-5p; 126-3p; 323b-3p; 92b-3p                                                                                                                                                                                                                                              |
| 11 | breast neoplasms                      | 1.78E-65 | 181 | 92a-3p; 106b-3p; 17-5p; 182-5p; 20a-5p; 155-5p; 96-5p; 18a-5p; 1246; 19a-3p; 19b-1-5p; hsa-let-7c-5p; 17-3p; 1290; 142-5p; 183-5p; 15b-3p; hsa-let-7e-5p; 142-3p; 1260a; 92a-1-5p; 744-5p; 16-2-3p; 873-5p; 93-5p; 200c-3p; 19b-3p; 582-5p; 497-5p; 146a-5p; 766-3p; 181c-5p; 106b-5p; 15b-5p; 130b-3p; 25-3p; 99a-3p; 210-3p; 9-5p; 486-5p; 425-5p; 16-5p; 125b-2-3p; 154-5p; 192-5p; 30d-5p; 381-3p; 1185-5p; 376a-3p; 376c-3p; 628-3p; 124-3p; 30a-5p; 410-3p; 486-3p; 9-3p; 127-5p; 299-5p; 31-5p; 625-3p; 655-3p; 451a; 539-5p; 769-5p; 505-3p; 191-5p; 136-3p; 154-3p; 125a-5p; 181c-3p; 195-5p; 203a-3p; 369-5p; 379-5p; 128-3p; 143-3p; hsa-let-7a-5p; 218-5p; 135a-5p; 423-5p; 543; 485-3p; 26b-3p; 487b-3p; 148a-3p; 21-3p; 129-5p; 29b-1-5p; 656-3p; 30c-5p; 1248; 30b-5p; 99a-5p; 380-3p; 144-3p; 654-3p; 101-5p; 31-3p; 93-3p; 329-3p; 132-3p; 484; 130a-3p; 134-5p; 935; 98-5p; 149-5p; 625-5p; 409-5p; 758-3p; 495-3p; 15a-5p; 376a-5p; 487a-3p; 95-3p; 551b-3p; 361-3p; 194-5p; 411-5p; 129-2-3p; 26a-5p; 296-5p; 106a-5p; 139-5p; 323a-3p; 423-3p; 425-3p; 320c; 1-3p; 132-5p; 335-3p; 144-5p; 33b-5p; 181d-5p; 18b-5p; 378a-3p; 629-5p; 590-5p; 432-5p; 7-5p; 124-5p; 320d; 138-5p; 127-3p; 532-3p; 187-3p; 409-3p; 339-5p; 382-5p; 27b-3p; 204-5p; 27a-3p; 383-5p; 769-3p; 494-3p; 502-3p; 139-3p; 32-5p; hsa-let-7b-5p; 21-5p; 590-3p; 20b-5p; 136-5p; 30a-3p; 340-5p; 153-3p; 99b-3p; 338-5p; 454-3p; 331-5p; 28-3p; 145-5p; 370-3p; 504-5p; 125b-5p; 92b-5p; 221-5p; 99b-5p; 126-3p; 92b-3p; 770-5p |
| 12 | thyroid cancer                        | 5.73E-65 | 111 | 92a-3p; 106b-3p; 17-5p; 182-5p; 20a-5p; 155-5p; 96-5p; 18a-5p; 19a-3p; 19b-1-5p; 142-5p; 183-5p; 15b-3p; hsa-let-7e-5p; 142-3p; 16-2-3p; 93-5p; 200c-3p; 19b-3p; 497-5p; 146a-5p; 181c-5p; 15b-5p; 25-3p; 210-3p; 9-5p; 486-5p; 16-5p; 154-5p; 30d-5p; 381-3p; 376a-3p; 376c-3p; 124-3p; 30a-5p; 410-3p; 9-3p; 299-5p; 31-5p; 451a; 539-5p; 191-5p; 136-3p; 154-3p; 125a-5p; 195-5p; 203a-3p; 369-5p; 379-5p; 485-5p; 143-3p; hsa-let-7a-5p; 218-5p; 543; 485-3p; 487b-3p; 148a-3p; 129-5p; 129-1-3p; 656-3p; 144-3p; 654-3p; 101-5p; 31-3p; 329-3p; 132-3p; 130a-3p; 149-5p; 625-5p; 409-5p; 758-3p; 495-3p; 15a-5p; 376a-5p; 487a-3p; 551b-3p; 411-5p; 433-3p; 129-2-3p; 26a-5p; 106a-5p; 323a-3p; 132-5p; 335-3p; 144-5p; 18b-5p; 629-5p; 432-5p; 7-5p; 138-5p; 127-3p; 409-3p; 339-5p; 382-5p; 27b-3p; 204-5p; 27a-3p; 369-3p; 376b-3p; hsa-let-7b-5p; 21-5p; 20b-5p; 136-5p; 30a-3p; 153-3p; 23b-3p; 145-5p; 125b-5p; 92b-5p; 99b-5p; 126-3p                                                                                                                                                                                                                                                                                                                                                                                                                                                                                                                                                                         |
| 13 | uterine corpus endometrial carcinoma  | 1.35E-64 | 146 | 92a-3p; 106b-3p; 17-5p; 182-5p; 155-5p; 96-5p; 18a-5p; 19a-3p; hsa-let-7c-5p; 142-5p; 183-5p; 15b-3p; 142-3p; 744-5p; 16-2-3p; 93-5p; 200c-3p; 19b-3p; 582-5p; 130b-5p; 497-5p; 146a-5p; 766-3p; 181c-5p; 106b-5p; 15b-5p; 4449; 130b-3p; 25-3p; 3615; 99a-3p; 210-3p; 9-5p; 425-5p; 16-5p; 125b-2-3p; 154-5p; 192-5p; 381-3p; 376c-3p; 410-3p; 486-3p; 9-3p; 127-5p; 299-5p; 31-5p; 655-3p; 451a; 539-5p; 769-5p; 505-3p; 191-5p; 136-3p; 154-3p; 125a-5p; 181c-3p; 195-5p; 203a-3p; 369-5p; 379-5p; 128-3p; 143-3p; hsa-let-7a-5p; 218-5p; 485-3p; 26b-3p; 487b-3p; 21-3p; 129-5p; 29b-1-5p; 378c; 30b-5p; 99a-5p; 628-5p; 654-3p; 101-5p; 31-3p; 93-3p; 132-3p; 484; 130a-3p; 3613-5p; 134-5p; 382-3p; 409-5p; 758-3p; 495-3p; 15a-5p; 95-3p; 551b-3p; 361-3p; 194-5p; 411-5p; 433-3p; 26a-5p; 296-5p; 106a-5p; 139-5p; 423-3p; 425-3p; 1-3p; 132-5p; 3065-5p; 144-5p; 33b-5p; 18b-5p; 378a-3p; 629-5p; 590-5p; 432-5p; 7-5p; 127-3p; 187-3p; 409-3p; 339-5p; 382-5p; 885-5p; 27b-3p; 340-3p; 204-5p; 769-3p; 494-3p; 369-3p; 411-3p; 502-3p; 376b-3p; 139-3p; 32-5p; hsa-let-7b-5p; 21-5p; 590-3p; 20b-5p; 136-5p; 153-3p; 99b-3p; 454-3p; 23b-3p;                                                                                                                                                                                                                                                                                                                                                                    |

|    |                                  |          |     |                                                                                                                                                                                                                                                                                                                                                                                                                                                                                                                                                                                                                                                                                                                                                                                                                                                                                                                                                                                                                                                                                                                                                                                                                                                                                                                                                                                                                                                                                                                                       |
|----|----------------------------------|----------|-----|---------------------------------------------------------------------------------------------------------------------------------------------------------------------------------------------------------------------------------------------------------------------------------------------------------------------------------------------------------------------------------------------------------------------------------------------------------------------------------------------------------------------------------------------------------------------------------------------------------------------------------------------------------------------------------------------------------------------------------------------------------------------------------------------------------------------------------------------------------------------------------------------------------------------------------------------------------------------------------------------------------------------------------------------------------------------------------------------------------------------------------------------------------------------------------------------------------------------------------------------------------------------------------------------------------------------------------------------------------------------------------------------------------------------------------------------------------------------------------------------------------------------------------------|
|    |                                  |          |     | 28-3p; 145-5p; 370-3p; 125b-5p; 92b-5p; 221-5p; 126-3p; 92b-3p; 1296-5p                                                                                                                                                                                                                                                                                                                                                                                                                                                                                                                                                                                                                                                                                                                                                                                                                                                                                                                                                                                                                                                                                                                                                                                                                                                                                                                                                                                                                                                               |
| 14 | Alzheimers disease               | 1.73E-64 | 153 | 92a-3p; 17-5p; 182-5p; 20a-5p; 155-5p; 96-5p; 18a-5p; 19a-3p; 17-3p; 142-5p; 183-5p; hsa-let-7e-5p; 142-3p; 1260a; 744-5p; 16-2-3p; 873-5p; 93-5p; 200c-3p; 19b-3p; 582-5p; 497-5p; 146a-5p; 766-3p; 181c-5p; 106b-5p; 15b-5p; 4449; 130b-3p; 25-3p; 210-3p; 9-5p; 486-5p; 425-5p; 16-5p; 154-5p; 192-5p; 30d-5p; 381-3p; 376a-3p; 376c-3p; 628-3p; 1285-3p; 124-3p; 30a-5p; 410-3p; 486-3p; 186-5p; 9-3p; 127-5p; 299-5p; 31-5p; 451a; 769-5p; 505-3p; 191-5p; 136-3p; 491-5p; 125a-5p; 195-5p; 203a-3p; 379-5p; 128-3p; 485-5p; 143-3p; hsa-let-7a-5p; 218-5p; 135a-5p; 423-5p; 543; 485-3p; 26b-3p; 487b-3p; 148a-3p; 129-5p; 30c-5p; 30b-5p; 99a-5p; 380-3p; 144-3p; 101-5p; 329-3p; 132-3p; 130a-3p; 134-5p; 98-5p; 149-5p; 409-5p; 758-3p; 495-3p; 15a-5p; 487a-3p; 95-3p; 551b-3p; 361-3p; 194-5p; 411-5p; 433-3p; 129-2-3p; 26a-5p; 296-5p; 106a-5p; 139-5p; 323a-3p; 423-3p; 425-3p; 320c; 1-3p; 132-5p; 144-5p; 33b-5p; 181d-5p; 18b-5p; 378a-3p; 629-5p; 590-5p; 487a-5p; 432-5p; 7-5p; 320d; 138-5p; 127-3p; 187-3p; 339-5p; 382-5p; 885-5p; 27b-3p; 204-5p; 27a-3p; 383-5p; 494-3p; 369-3p; 502-3p; 32-5p; 21-5p; 590-3p; 20b-5p; 136-5p; 30a-3p; 340-5p; 153-3p; 338-5p; 454-3p; 23b-3p; 331-5p; 28-3p; 211-5p; 145-5p; 370-3p; 125b-5p; 99b-5p; 126-3p; 92b-3p                                                                                                                                                                                                                                                         |
| 15 | cervical squamous cell carcinoma | 5.27E-63 | 107 | 92a-3p; 106b-3p; 17-5p; 182-5p; 96-5p; 18a-5p; 19a-3p; hsa-let-7c-5p; 17-3p; 142-5p; 183-5p; 15b-3p; 142-3p; 16-2-3p; 93-5p; 200c-3p; 19b-3p; 130b-5p; 497-5p; 146a-5p; 181c-5p; 106b-5p; 15b-5p; 130b-3p; 25-3p; 99a-3p; 210-3p; 9-5p; 486-5p; 425-5p; 16-5p; 125b-2-3p; 154-5p; 30d-5p; 381-3p; 376a-3p; 376c-3p; 124-3p; 410-3p; 186-5p; 299-5p; 31-5p; 451a; 539-5p; 136-3p; 125a-5p; 195-5p; 203a-3p; 379-5p; 143-3p; hsa-let-7a-5p; 218-5p; 423-5p; 543; 487b-3p; 148a-3p; 21-3p; 129-5p; 656-3p; 30c-5p; 30b-5p; 99a-5p; 654-3p; 101-5p; 93-3p; 132-3p; 484; 3613-5p; 134-5p; 149-5p; 409-5p; 758-3p; 495-3p; 15a-5p; 411-5p; 433-3p; 26a-5p; 296-5p; 106a-5p; 139-5p; 320c; 1-3p; 33b-5p; 181d-5p; 378a-3p; 629-5p; 487a-5p; 432-5p; 127-3p; 339-5p; 204-5p; 27a-3p; 494-3p; 411-3p; 502-3p; 376b-3p; 139-3p; 32-5p; 21-5p; 20b-5p; 23b-3p; 28-3p; 145-5p; 370-3p; 125b-5p; 92b-3p; 1296-5p                                                                                                                                                                                                                                                                                                                                                                                                                                                                                                                                                                                                                                   |
| 16 | hepatocellular carcinoma         | 7.44E-63 | 191 | 92a-3p; 106b-3p; 17-5p; 182-5p; 20a-5p; 155-5p; 96-5p; 18a-5p; 1246; 19a-3p; 19b-1-5p; hsa-let-7c-5p; 17-3p; 1290; 142-5p; 183-5p; 15b-3p; hsa-let-7e-5p; 142-3p; 1260a; 92a-1-5p; 744-5p; 16-2-3p; 93-5p; 200c-3p; 19b-3p; 582-5p; 130b-5p; 497-5p; 146a-5p; 766-3p; 181c-5p; 106b-5p; 15b-5p; 130b-3p; 25-3p; 3615; 99a-3p; 210-3p; 9-5p; 486-5p; 425-5p; 16-5p; 125b-2-3p; 154-5p; 192-5p; 30d-5p; 381-3p; 376a-3p; 376c-3p; 628-3p; 124-3p; 30a-5p; 410-3p; 486-3p; 186-5p; 9-3p; 127-5p; 299-5p; 31-5p; 625-3p; 655-3p; 451a; 539-5p; 769-5p; 505-3p; 191-5p; 136-3p; 154-3p; 491-5p; 125a-5p; 195-5p; 203a-3p; 369-5p; 379-5p; 128-3p; 485-5p; 143-3p; hsa-let-7a-5p; 218-5p; 135a-5p; 423-5p; 543; 485-3p; 26b-3p; 487b-3p; 148a-3p; 21-3p; 129-5p; 29b-1-5p; 378c; 30c-5p; 1248; 30b-5p; 99a-5p; 144-3p; 654-3p; 101-5p; 93-3p; 329-3p; 132-3p; 484; 130a-3p; 3613-5p; 134-5p; 935; 98-5p; 149-5p; 625-5p; 409-5p; 758-3p; 495-3p; 15a-5p; 376a-5p; 487a-3p; 95-3p; 551b-3p; 361-3p; 194-5p; 411-5p; 433-3p; 129-2-3p; 26a-5p; 296-5p; 106a-5p; 139-5p; 323a-3p; 423-3p; 425-3p; 320c; 1-3p; 132-5p; 335-3p; 144-5p; 33b-5p; 181d-5p; 18b-5p; 378a-3p; 629-5p; 590-5p; 432-5p; 7-5p; 138-5p; 127-3p; 532-3p; 187-3p; 409-3p; 339-5p; 382-5p; 885-5p; 27b-3p; 340-3p; 204-5p; 27a-3p; 383-5p; 769-3p; 494-3p; 369-3p; 411-3p; 502-3p; 376b-3p; 139-3p; 32-5p; hsa-let-7b-5p; 21-5p; 590-3p; 20b-5p; 136-5p; 30a-3p; 340-5p; 378d; 153-3p; 99b-3p; 338-5p; 454-3p; 23b-3p; 331-5p; 28-3p; 211-5p; 145-5p; 370-3p; 504-5p; 125b- |

|    |                        |          |     |                                                                                                                                                                                                                                                                                                                                                                                                                                                                                                                                                                                                                                                                                                                                                                                                                                                                                                                                                                                                                                                                                                                                                                                                                                                                                                                                                                                                                                                                 |
|----|------------------------|----------|-----|-----------------------------------------------------------------------------------------------------------------------------------------------------------------------------------------------------------------------------------------------------------------------------------------------------------------------------------------------------------------------------------------------------------------------------------------------------------------------------------------------------------------------------------------------------------------------------------------------------------------------------------------------------------------------------------------------------------------------------------------------------------------------------------------------------------------------------------------------------------------------------------------------------------------------------------------------------------------------------------------------------------------------------------------------------------------------------------------------------------------------------------------------------------------------------------------------------------------------------------------------------------------------------------------------------------------------------------------------------------------------------------------------------------------------------------------------------------------|
|    |                        |          |     | 5p; 92b-5p; 221-5p; 99b-5p; 126-3p; 92b-3p; 770-5p; 1296-5p; 1249-3p                                                                                                                                                                                                                                                                                                                                                                                                                                                                                                                                                                                                                                                                                                                                                                                                                                                                                                                                                                                                                                                                                                                                                                                                                                                                                                                                                                                            |
| 17 | gastric adenocarcinoma | 6.09E-61 | 139 | 92a-3p; 106b-3p; 17-5p; 182-5p; 20a-5p; 155-5p; 96-5p; 18a-5p; 19a-3p; 19b-1-5p; hsa-let-7c-5p; 17-3p; 142-5p; 183-5p; 15b-3p; hsa-let-7e-5p; 142-3p; 92a-1-5p; 744-5p; 16-2-3p; 93-5p; 200c-3p; 19b-3p; 582-5p; 130b-5p; 497-5p; 146a-5p; 766-3p; 181c-5p; 106b-5p; 15b-5p; 130b-3p; 25-3p; 99a-3p; 210-3p; 9-5p; 486-5p; 425-5p; 16-5p; 125b-2-3p; 154-5p; 192-5p; 30d-5p; 381-3p; 376c-3p; 628-3p; 30a-5p; 410-3p; 486-3p; 186-5p; 9-3p; 127-5p; 299-5p; 655-3p; 451a; 539-5p; 191-5p; 136-3p; 154-3p; 491-5p; 125a-5p; 195-5p; 203a-3p; 369-5p; 379-5p; 143-3p; hsa-let-7a-5p; 218-5p; 135a-5p; 543; 485-3p; 487b-3p; 21-3p; 129-5p; 29b-1-5p; 378c; 30c-5p; 30b-5p; 99a-5p; 628-5p; 144-3p; 654-3p; 101-5p; 93-3p; 132-3p; 484; 130a-3p; 3613-5p; 935; 149-5p; 382-3p; 758-3p; 495-3p; 15a-5p; 376a-5p; 95-3p; 551b-3p; 194-5p; 411-5p; 433-3p; 26a-5p; 106a-5p; 139-5p; 423-3p; 1-3p; 132-5p; 335-3p; 144-5p; 378a-3p; 590-5p; 432-5p; 7-5p; 138-5p; 127-3p; 532-3p; 187-3p; 382-5p; 27b-3p; 340-3p; 204-5p; 411-3p; 502-3p; 376b-3p; 139-3p; hsa-let-7b-5p; 21-5p; 590-3p; 20b-5p; 136-5p; 30a-3p; 378d; 153-3p; 338-5p; 23b-3p; 28-3p; 145-5p; 125b-5p; 221-5p; 1296-5p                                                                                                                                                                                                                                                                                 |
| 18 | lung adenocarcinoma    | 1.04E-60 | 175 | 106b-3p; 17-5p; 182-5p; 20a-5p; 155-5p; 96-5p; 18a-5p; 1246; 19a-3p; 19b-1-5p; hsa-let-7c-5p; 17-3p; 4521; 1290; 142-5p; 183-5p; hsa-let-7e-5p; 142-3p; 1260a; 744-5p; 16-2-3p; 93-5p; 200c-3p; 19b-3p; 582-5p; 130b-5p; 497-5p; 146a-5p; 181c-5p; 106b-5p; 15b-5p; 130b-3p; 25-3p; 3615; 99a-3p; 210-3p; 9-5p; 486-5p; 425-5p; 16-5p; 125b-2-3p; 154-5p; 192-5p; 30d-5p; 381-3p; 376c-3p; 628-3p; 1285-3p; 124-3p; 30a-5p; 410-3p; 486-3p; 186-5p; 9-3p; 127-5p; 31-5p; 625-3p; 655-3p; 451a; 539-5p; 769-5p; 505-3p; 191-5p; 136-3p; 154-3p; 491-5p; 125a-5p; 195-5p; 203a-3p; 379-5p; 128-3p; 143-3p; hsa-let-7a-5p; 218-5p; 135a-5p; 423-5p; 543; 485-3p; 26b-3p; 487b-3p; 148a-3p; 21-3p; 129-5p; 29b-1-5p; 378c; 30c-5p; 1248; 30b-5p; 99a-5p; 628-5p; 144-3p; 654-3p; 101-5p; 31-3p; 93-3p; 132-3p; 484; 130a-3p; 3613-5p; 134-5p; 935; 98-5p; 149-5p; 625-5p; 409-5p; 758-3p; 15a-5p; 95-3p; 551b-3p; 361-3p; 194-5p; 411-5p; 129-2-3p; 26a-5p; 296-5p; 106a-5p; 139-5p; 323a-3p; 423-3p; 425-3p; 320c; 1-3p; 132-5p; 335-3p; 144-5p; 33b-5p; 18b-5p; 378a-3p; 629-5p; 590-5p; 432-5p; 7-5p; 320d; 138-5p; 127-3p; 187-3p; 409-3p; 339-5p; 382-5p; 885-5p; 204-5p; 27a-3p; 383-5p; 769-3p; 494-3p; 411-3p; 502-3p; 139-3p; 32-5p; hsa-let-7b-5p; 21-5p; 20b-5p; 136-5p; 30a-3p; 340-5p; 378d; 153-3p; 99b-3p; 338-5p; 454-3p; 23b-3p; 28-3p; 211-5p; 145-5p; 370-3p; 504-5p; 125b-5p; 221-5p; 99b-5p; 126-3p; 323b-3p; 92b-3p; 770-5p; 1296-5p; 1249-3p |

|    |                       |          |     |                                                                                                                                                                                                                                                                                                                                                                                                                                                                                                                                                                                                                                                                                                                                                                                                                                                                                                                                                                                                                                                                                                                                                                                                                                                                                                                                                                                                                                                                                                                                                                                                                                                                                       |
|----|-----------------------|----------|-----|---------------------------------------------------------------------------------------------------------------------------------------------------------------------------------------------------------------------------------------------------------------------------------------------------------------------------------------------------------------------------------------------------------------------------------------------------------------------------------------------------------------------------------------------------------------------------------------------------------------------------------------------------------------------------------------------------------------------------------------------------------------------------------------------------------------------------------------------------------------------------------------------------------------------------------------------------------------------------------------------------------------------------------------------------------------------------------------------------------------------------------------------------------------------------------------------------------------------------------------------------------------------------------------------------------------------------------------------------------------------------------------------------------------------------------------------------------------------------------------------------------------------------------------------------------------------------------------------------------------------------------------------------------------------------------------|
| 19 | breast cancer         | 1.09E-60 | 199 | <p>92a-3p; 106b-3p; 17-5p; 182-5p; 20a-5p; 155-5p; 96-5p; 18a-5p; 1246; 19a-3p; 19b-1-5p; hsa-let-7c-5p; 17-3p; 1290; 142-5p; 183-5p; 15b-3p; hsa-let-7e-5p; 142-3p; 1260a; 92a-1-5p; 744-5p; 16-2-3p; 873-5p; 93-5p; 200c-3p; 19b-3p; 582-5p; 130b-5p; 497-5p; 146a-5p; 766-3p; 181c-5p; 106b-5p; 15b-5p; 4449; 130b-3p; 25-3p; 99a-3p; 210-3p; 9-5p; 486-5p; 425-5p; 16-5p; 125b-2-3p; 154-5p; 192-5p; 30d-5p; 381-3p; 1185-5p; 376a-3p; 376c-3p; 628-3p; 1285-3p; 124-3p; 30a-5p; 410-3p; 486-3p; 186-5p; 9-3p; 127-5p; 299-5p; 31-5p; 625-3p; 655-3p; 451a; 539-5p; 769-5p; 505-3p; 191-5p; 136-3p; 154-3p; 491-5p; 125a-5p; 181c-3p; 195-5p; 203a-3p; 369-5p; 379-5p; 128-3p; 485-5p; 143-3p; hsa-let-7a-5p; 218-5p; 135a-5p; 423-5p; 543; 485-3p; 26b-3p; 487b-3p; 148a-3p; 21-3p; 129-5p; 29b-1-5p; 129-1-3p; 656-3p; 30c-5p; 1248; 30b-5p; 99a-5p; 380-3p; 628-5p; 144-3p; 654-3p; 101-5p; 31-3p; 93-3p; 329-3p; 132-3p; 484; 130a-3p; 3613-5p; 134-5p; 935; 98-5p; 149-5p; 625-5p; 409-5p; 758-3p; 495-3p; 15a-5p; 376a-5p; 487a-3p; 95-3p; 551b-3p; 361-3p; 194-5p; 411-5p; 433-3p; 129-2-3p; 26a-5p; 296-5p; 106a-5p; 139-5p; 323a-3p; 423-3p; 425-3p; 320c; 1-3p; 132-5p; 335-3p; 144-5p; 33b-5p; 181d-5p; 18b-5p; 378a-3p; 629-5p; 590-5p; 487a-5p; 432-5p; 7-5p; 124-5p; 320d; 138-5p; 127-3p; 532-3p; 187-3p; 409-3p; 339-5p; 382-5p; 885-5p; 27b-3p; 340-3p; 204-5p; 27a-3p; 383-5p; 769-3p; 494-3p; 369-3p; 411-3p; 502-3p; 376b-3p; 139-3p; 32-5p; hsa-let-7b-5p; 21-5p; 590-3p; 20b-5p; 136-5p; 30a-3p; 340-5p; 153-3p; 99b-3p; 338-5p; 454-3p; 23b-3p; 331-5p; 28-3p; 211-5p; 145-5p; 370-3p; 504-5p; 125b-5p; 92b-5p; 221-5p; 99b-5p; 126-3p; 92b-3p; 770-5p</p> |
| 20 | carcinoma. renal cell | 4.97E-60 | 136 | <p>92a-3p; 106b-3p; 182-5p; 155-5p; 96-5p; 18a-5p; 19a-3p; hsa-let-7c-5p; 17-3p; 142-5p; 183-5p; 15b-3p; 142-3p; 92a-1-5p; 744-5p; 16-2-3p; 93-5p; 200c-3p; 19b-3p; 582-5p; 130b-5p; 497-5p; 146a-5p; 766-3p; 181c-5p; 106b-5p; 15b-5p; 130b-3p; 25-3p; 9-5p; 486-5p; 425-5p; 16-5p; 154-5p; 192-5p; 30d-5p; 381-3p; 376c-3p; 628-3p; 30a-5p; 410-3p; 486-3p; 127-5p; 299-5p; 451a; 539-5p; 769-5p; 505-3p; 191-5p; 136-3p; 125a-5p; 181c-3p; 195-5p; 203a-3p; 379-5p; 143-3p; hsa-let-7a-5p; 218-5p; 135a-5p; 423-5p; 485-3p; 26b-3p; 487b-3p; 21-3p; 29b-1-5p; 30c-5p; 30b-5p; 99a-5p; 144-3p; 654-3p; 101-5p; 93-3p; 132-3p; 130a-3p; 3613-5p; 134-5p; 935; 98-5p; 149-5p; 625-5p; 409-5p; 758-3p; 495-3p; 15a-5p; 95-3p; 361-3p; 194-5p; 411-5p; 26a-5p; 106a-5p; 323a-3p; 423-3p; 425-3p; 320c; 1-3p; 132-5p; 335-3p; 144-5p; 33b-5p; 181d-5p; 18b-5p; 378a-3p; 629-5p; 590-5p; 432-5p; 127-3p; 187-3p; 409-3p; 382-5p; 885-5p; 27b-3p; 340-3p; 204-5p; 27a-3p; 369-3p; 502-3p; 139-3p; hsa-let-7b-5p; 21-5p; 590-3p; 20b-5p; 136-5p; 30a-3p; 340-5p; 153-3p; 338-5p; 23b-3p; 331-5p; 145-5p; 370-3p; 221-5p; 99b-5p; 126-3p; 323b-3p; 92b-3p; 1249-3p</p>                                                                                                                                                                                                                                                                                                                                                                                                                                                                                                                       |
| 21 | synovial sarcoma      | 1.07E-59 | 97  | <p>92a-3p; 106b-3p; 17-5p; 20a-5p; 155-5p; 18a-5p; 19a-3p; 142-5p; hsa-let-7e-5p; 142-3p; 200c-3p; 19b-3p; 146a-5p; 181c-5p; 106b-5p; 130b-3p; 99a-3p; 210-3p; 9-5p; 486-5p; 16-5p; 125b-2-3p; 154-5p; 376a-3p; 376c-3p; 628-3p; 30a-5p; 410-3p; 486-3p; 127-5p; 31-5p; 625-3p; 769-5p; 191-5p; 154-3p; 125a-5p; 369-5p; 379-5p; 485-5p; 143-3p; hsa-let-7a-5p; 218-5p; 543; 485-3p; 487b-3p; 148a-3p; 380-3p; 654-3p; 93-3p; 329-3p; 132-3p; 130a-3p; 134-5p; 98-5p; 149-5p; 409-5p; 495-3p; 15a-5p; 487a-3p; 95-3p; 551b-3p; 411-5p; 433-3p; 26a-5p; 296-5p; 423-3p; 425-3p; 1-3p; 181d-5p; 378a-3p; 432-5p; 7-5p; 127-3p; 409-3p; 382-5p; 204-5p; 27a-3p; 769-3p; 494-3p; 411-3p; 376b-3p; 21-5p; 20b-5p; 136-5p; 30a-3p; 340-5p; 99b-3p; 338-5p; 454-3p; 211-5p; 145-5p; 370-3p; 125b-5p; 92b-5p; 99b-5p; 126-3p; 92b-3p</p>                                                                                                                                                                                                                                                                                                                                                                                                                                                                                                                                                                                                                                                                                                                                                                                                                                                      |

|    |                           |          |     |                                                                                                                                                                                                                                                                                                                                                                                                                                                                                                                                                                                                                                                                                                                                                                                                                                                                                                                                                                                                                                                                                                                                                                                                                                                                                                                                                                                                                                                                                                                                          |
|----|---------------------------|----------|-----|------------------------------------------------------------------------------------------------------------------------------------------------------------------------------------------------------------------------------------------------------------------------------------------------------------------------------------------------------------------------------------------------------------------------------------------------------------------------------------------------------------------------------------------------------------------------------------------------------------------------------------------------------------------------------------------------------------------------------------------------------------------------------------------------------------------------------------------------------------------------------------------------------------------------------------------------------------------------------------------------------------------------------------------------------------------------------------------------------------------------------------------------------------------------------------------------------------------------------------------------------------------------------------------------------------------------------------------------------------------------------------------------------------------------------------------------------------------------------------------------------------------------------------------|
| 22 | leukemia                  | 6.94E-59 | 177 | <p>92a-3p; 106b-3p; 17-5p; 182-5p; 20a-5p; 155-5p; 96-5p; 18a-5p; 19a-3p; 19b-1-5p; hsa-let-7c-5p; 17-3p; 142-5p; 183-5p; 15b-3p; hsa-let-7e-5p; 142-3p; 92a-1-5p; 744-5p; 16-2-3p; 873-5p; 93-5p; 200c-3p; 19b-3p; 582-5p; 497-5p; 146a-5p; 766-3p; 181c-5p; 106b-5p; 15b-5p; 130b-3p; 25-3p; 210-3p; 9-5p; 486-5p; 425-5p; 16-5p; 125b-2-3p; 154-5p; 192-5p; 30d-5p; 381-3p; 376a-3p; 376c-3p; 628-3p; 124-3p; 30a-5p; 410-3p; 486-3p; 186-5p; 9-3p; 299-5p; 31-5p; 655-3p; 451a; 539-5p; 769-5p; 191-5p; 154-3p; 491-5p; 125a-5p; 181c-3p; 195-5p; 203a-3p; 369-5p; 379-5p; 128-3p; 485-5p; 143-3p; hsa-let-7a-5p; 218-5p; 135a-5p; 423-5p; 543; 485-3p; 26b-3p; 487b-3p; 148a-3p; 129-5p; 29b-1-5p; 129-1-3p; 30c-5p; 30b-5p; 99a-5p; 628-5p; 144-3p; 101-5p; 31-3p; 93-3p; 329-3p; 132-3p; 484; 130a-3p; 134-5p; 935; 98-5p; 149-5p; 625-5p; 409-5p; 758-3p; 495-3p; 15a-5p; 376a-5p; 487a-3p; 95-3p; 551b-3p; 361-3p; 194-5p; 411-5p; 433-3p; 129-2-3p; 26a-5p; 296-5p; 106a-5p; 139-5p; 323a-3p; 423-3p; 425-3p; 320c; 1-3p; 132-5p; 144-5p; 33b-5p; 181d-5p; 18b-5p; 378a-3p; 629-5p; 590-5p; 487a-5p; 432-5p; 7-5p; 124-5p; 320d; 138-5p; 127-3p; 532-3p; 187-3p; 409-3p; 339-5p; 382-5p; 885-5p; 27b-3p; 204-5p; 27a-3p; 383-5p; 769-3p; 494-3p; 369-3p; 411-3p; 502-3p; 376b-3p; 139-3p; 32-5p; hsa-let-7b-5p; 21-5p; 590-3p; 20b-5p; 136-5p; 30a-3p; 340-5p; 153-3p; 338-5p; 454-3p; 23b-3p; 331-5p; 28-3p; 211-5p; 145-5p; 370-3p; 125b-5p; 92b-5p; 99b-5p; 126-3p; 92b-3p; 770-5p; 1296-5p</p>                             |
| 23 | vascular disease          | 2.16E-58 | 183 | <p>92a-3p; 106b-3p; 17-5p; 182-5p; 20a-5p; 155-5p; 96-5p; 18a-5p; 19a-3p; 19b-1-5p; 17-3p; 142-5p; 183-5p; 15b-3p; 142-3p; 92a-1-5p; 744-5p; 16-2-3p; 873-5p; 93-5p; 200c-3p; 19b-3p; 582-5p; 130b-5p; 497-5p; 146a-5p; 766-3p; 181c-5p; 106b-5p; 15b-5p; 130b-3p; 25-3p; 99a-3p; 210-3p; 9-5p; 486-5p; 425-5p; 16-5p; 125b-2-3p; 154-5p; 192-5p; 30d-5p; 381-3p; 376a-3p; 376c-3p; 628-3p; 124-3p; 30a-5p; 410-3p; 486-3p; 186-5p; 9-3p; 127-5p; 299-5p; 31-5p; 625-3p; 655-3p; 451a; 539-5p; 769-5p; 505-3p; 191-5p; 136-3p; 154-3p; 491-5p; 125a-5p; 181c-3p; 195-5p; 203a-3p; 369-5p; 379-5p; 128-3p; 485-5p; 143-3p; hsa-let-7a-5p; 218-5p; 135a-5p; 423-5p; 543; 485-3p; 26b-3p; 487b-3p; 148a-3p; 21-3p; 129-5p; 29b-1-5p; 129-1-3p; 30c-5p; 30b-5p; 99a-5p; 380-3p; 628-5p; 144-3p; 654-3p; 101-5p; 31-3p; 93-3p; 329-3p; 132-3p; 484; 130a-3p; 134-5p; 935; 98-5p; 149-5p; 625-5p; 409-5p; 758-3p; 495-3p; 15a-5p; 376a-5p; 487a-3p; 95-3p; 551b-3p; 361-3p; 194-5p; 411-5p; 433-3p; 129-2-3p; 26a-5p; 296-5p; 106a-5p; 139-5p; 323a-3p; 423-3p; 425-3p; 1-3p; 132-5p; 335-3p; 144-5p; 33b-5p; 18b-5p; 629-5p; 590-5p; 487a-5p; 432-5p; 7-5p; 124-5p; 138-5p; 127-3p; 532-3p; 187-3p; 409-3p; 339-5p; 382-5p; 885-5p; 27b-3p; 340-3p; 204-5p; 27a-3p; 383-5p; 769-3p; 494-3p; 369-3p; 411-3p; 502-3p; 376b-3p; 139-3p; 32-5p; 21-5p; 590-3p; 20b-5p; 136-5p; 30a-3p; 340-5p; 153-3p; 99b-3p; 338-5p; 454-3p; 23b-3p; 331-5p; 28-3p; 211-5p; 145-5p; 370-3p; 504-5p; 125b-5p; 92b-5p; 221-5p; 99b-5p; 126-3p; 92b-3p; 770-5p</p> |
| 24 | lung small cell carcinoma | 5.58E-58 | 118 | <p>92a-3p; 106b-3p; 17-5p; 182-5p; 20a-5p; 155-5p; 96-5p; 18a-5p; 1246; 19a-3p; 19b-1-5p; 17-3p; 1290; 142-5p; 183-5p; 15b-3p; 142-3p; 1260a; 16-2-3p; 873-5p; 93-5p; 200c-3p; 19b-3p; 497-5p; 146a-5p; 106b-5p; 15b-5p; 130b-3p; 25-3p; 210-3p; 9-5p; 486-5p; 425-5p; 16-5p; 125b-2-3p; 30d-5p; 381-3p; 376c-3p; 124-3p; 30a-5p; 410-3p; 9-3p; 31-5p; 451a; 539-5p; 769-5p; 505-3p; 191-5p; 491-5p; 181c-3p; 195-5p; 203a-3p; 379-5p; 128-3p; 143-3p; hsa-let-7a-5p; 218-5p; 135a-5p; 543; 485-3p; 487b-3p; 148a-3p; 21-3p; 129-5p; 29b-1-5p; 129-1-3p; 30c-5p; 30b-5p; 99a-5p; 628-5p; 144-3p; 654-3p; 101-5p; 31-3p; 329-3p; 130a-3p; 134-5p; 98-5p; 149-5p; 625-5p; 758-3p; 495-3p; 15a-5p; 376a-5p; 95-3p; 551b-3p; 361-3p; 433-3p; 26a-5p; 106a-5p; 139-5p; 323a-3p; 1-3p; 335-3p; 144-5p; 181d-5p; 18b-5p; 7-5p; 138-5p; 409-3p; 885-5p; 340-3p; 27a-3p; 383-5p; 494-3p; 376b-3p; 139-3p; 21-5p; 20b-5p; 30a-3p; 340-5p; 153-3p; 99b-3p; 454-3p; 145-5p; 125b-5p; 221-5p; 126-3p</p>                                                                                                                                                                                                                                                                                                                                                                                                                                                                                                                                              |



|    |                                              |          |     |                                                                                                                                                                                                                                                                                                                                                                                                                                                                                                                                                                                                                                                                                                                                                                                                                                                                                                                                                                                                                                                                                                                                                                                                                                                                                                                                                                                                                         |
|----|----------------------------------------------|----------|-----|-------------------------------------------------------------------------------------------------------------------------------------------------------------------------------------------------------------------------------------------------------------------------------------------------------------------------------------------------------------------------------------------------------------------------------------------------------------------------------------------------------------------------------------------------------------------------------------------------------------------------------------------------------------------------------------------------------------------------------------------------------------------------------------------------------------------------------------------------------------------------------------------------------------------------------------------------------------------------------------------------------------------------------------------------------------------------------------------------------------------------------------------------------------------------------------------------------------------------------------------------------------------------------------------------------------------------------------------------------------------------------------------------------------------------|
| 25 | lung squamous cell carcinoma                 | 1.46E-57 | 156 | 92a-3p; 106b-3p; 17-5p; 182-5p; 20a-5p; 155-5p; 96-5p; 18a-5p; 19a-3p; 19b-1-5p; hsa-let-7c-5p; 17-3p; 4521; 1290; 142-5p; 183-5p; 15b-3p; hsa-let-7e-5p; 142-3p; 92a-1-5p; 16-2-3p; 93-5p; 200c-3p; 19b-3p; 582-5p; 130b-5p; 497-5p; 146a-5p; 766-3p; 181c-5p; 106b-5p; 15b-5p; 4449; 130b-3p; 25-3p; 3615; 99a-3p; 210-3p; 9-5p; 486-5p; 425-5p; 16-5p; 125b-2-3p; 192-5p; 30d-5p; 381-3p; 30a-5p; 410-3p; 186-5p; 9-3p; 127-5p; 31-5p; 378a-3p; 451a; 539-5p; 769-5p; 505-3p; 191-5p; 136-3p; 491-5p; 125a-5p; 181c-3p; 195-5p; 203a-3p; 379-5p; 128-3p; 485-5p; 143-3p; hsa-let-7a-5p; 218-5p; 135a-5p; 26b-3p; 148a-3p; 21-3p; 129-5p; 378c; 30c-5p; 30b-5p; 99a-5p; 380-3p; 628-5p; 144-3p; 101-5p; 31-3p; 93-3p; 329-3p; 132-3p; 484; 130a-3p; 134-5p; 98-5p; 149-5p; 625-5p; 409-5p; 15a-5p; 551b-3p; 361-3p; 194-5p; 26a-5p; 106a-5p; 139-5p; 323a-3p; 423-3p; 425-3p; 320c; 1-3p; 132-5p; 3065-5p; 335-3p; 144-5p; 33b-5p; 181d-5p; 18b-5p; 378a-3p; 629-5p; 590-5p; 432-5p; 7-5p; 320d; 138-5p; 409-3p; 339-5p; 382-5p; 27b-3p; 340-3p; 27a-3p; 383-5p; 769-3p; 494-3p; 369-3p; 502-3p; 139-3p; 32-5p; hsa-let-7b-5p; 21-5p; 590-3p; 20b-5p; 136-5p; 30a-3p; 340-5p; 378d; 99b-3p; 338-5p; 454-3p; 23b-3p; 28-3p; 211-5p; 145-5p; 370-3p; 504-5p; 125b-5p; 221-5p; 99b-5p; 126-3p; 323b-3p; 1249-3p                                                                                                          |
| 26 | progesterone-receptor positive breast cancer | 2.13E-57 | 169 | 92a-3p; 106b-3p; 17-5p; 182-5p; 20a-5p; 155-5p; 96-5p; 18a-5p; 19a-3p; 19b-1-5p; hsa-let-7c-5p; 17-3p; 1290; 142-5p; 183-5p; 15b-3p; hsa-let-7e-5p; 142-3p; 1260a; 744-5p; 873-5p; 93-5p; 200c-3p; 497-5p; 146a-5p; 766-3p; 181c-5p; 106b-5p; 15b-5p; 130b-3p; 25-3p; 210-3p; 9-5p; 486-5p; 425-5p; 16-5p; 125b-2-3p; 154-5p; 192-5p; 381-3p; 1185-5p; 376a-3p; 376c-3p; 628-3p; 124-3p; 30a-5p; 410-3p; 486-3p; 9-3p; 127-5p; 299-5p; 31-5p; 625-3p; 655-3p; 451a; 539-5p; 769-5p; 505-3p; 191-5p; 136-3p; 154-3p; 125a-5p; 181c-3p; 195-5p; 203a-3p; 369-5p; 379-5p; 128-3p; 143-3p; hsa-let-7a-5p; 218-5p; 135a-5p; 423-5p; 543; 485-3p; 487b-3p; 148a-3p; 21-3p; 129-5p; 29b-1-5p; 656-3p; 30c-5p; 1248; 30b-5p; 99a-5p; 380-3p; 654-3p; 101-5p; 31-3p; 93-3p; 329-3p; 132-3p; 484; 130a-3p; 134-5p; 935; 98-5p; 149-5p; 625-5p; 409-5p; 758-3p; 495-3p; 15a-5p; 376a-5p; 487a-3p; 95-3p; 551b-3p; 361-3p; 194-5p; 411-5p; 433-3p; 129-2-3p; 26a-5p; 296-5p; 106a-5p; 139-5p; 423-3p; 425-3p; 320c; 1-3p; 132-5p; 335-3p; 144-5p; 33b-5p; 181d-5p; 378a-3p; 629-5p; 590-5p; 432-5p; 7-5p; 124-5p; 320d; 138-5p; 127-3p; 532-3p; 187-3p; 409-3p; 339-5p; 382-5p; 27b-3p; 204-5p; 383-5p; 769-3p; 494-3p; 502-3p; 139-3p; 32-5p; hsa-let-7b-5p; 21-5p; 590-3p; 20b-5p; 30a-3p; 340-5p; 153-3p; 99b-3p; 338-5p; 454-3p; 331-5p; 28-3p; 145-5p; 370-3p; 504-5p; 125b-5p; 92b-5p; 221-5p; 99b-5p; 126-3p; 92b-3p; 770-5p |
| 27 | thyroid carcinoma                            | 4.01E-57 | 142 | 92a-3p; 106b-3p; 17-5p; 182-5p; 20a-5p; 155-5p; 96-5p; 18a-5p; 19a-3p; 19b-1-5p; hsa-let-7c-5p; 17-3p; 142-5p; 183-5p; 15b-3p; hsa-let-7e-5p; 142-3p; 92a-1-5p; 744-5p; 16-2-3p; 200c-3p; 19b-3p; 130b-5p; 497-5p; 146a-5p; 181c-5p; 106b-5p; 130b-3p; 25-3p; 3615; 210-3p; 9-5p; 486-5p; 425-5p; 16-5p; 154-5p; 192-5p; 30d-5p; 381-3p; 376c-3p; 628-3p; 30a-5p; 410-3p; 486-3p; 186-5p; 127-5p; 299-5p; 31-5p; 625-3p; 655-3p; 451a; 539-5p; 769-5p; 136-3p; 154-3p; 125a-5p; 181c-3p; 195-5p; 203a-3p; 369-5p; 379-5p; 128-3p; 143-3p; 218-5p; 485-3p; 26b-3p; 148a-3p; 21-3p; 129-5p; 29b-1-5p; 378c; 30c-5p; 30b-5p; 99a-5p; 628-5p; 144-3p; 654-3p; 31-3p; 132-3p; 130a-3p; 3613-5p; 134-5p; 935; 98-5p; 149-5p; 625-5p; 409-5p; 758-3p; 495-3p; 15a-5p; 95-3p; 551b-3p; 361-3p; 411-5p; 26a-5p; 106a-5p; 139-5p; 323a-3p; 423-3p; 425-3p; 1-3p; 132-5p; 3065-5p; 335-3p; 144-5p; 33b-5p; 181d-5p; 629-5p; 590-5p; 7-5p; 320d; 138-5p; 127-3p; 532-3p; 187-3p; 409-3p; 382-5p; 27b-3p; 340-3p; 204-5p; 369-3p; 502-3p; 139-3p; hsa-let-7b-5p; 21-5p; 20b-5p; 136-5p; 30a-3p; 153-3p; 99b-3p; 338-5p; 23b-3p; 331-5p; 28-3p; 145-5p; 125b-5p; 221-5p; 99b-5p; 126-3p; 92b-3p; 1296-5p; 1249-3p                                                                                                                                                                                                                     |

|    |                                                 |          |     |                                                                                                                                                                                                                                                                                                                                                                                                                                                                                                                                                                                                                                                                                                                                                                                                                                                                                                                                                                                                                                                                                                                                                                                                                                                                                                                                                              |
|----|-------------------------------------------------|----------|-----|--------------------------------------------------------------------------------------------------------------------------------------------------------------------------------------------------------------------------------------------------------------------------------------------------------------------------------------------------------------------------------------------------------------------------------------------------------------------------------------------------------------------------------------------------------------------------------------------------------------------------------------------------------------------------------------------------------------------------------------------------------------------------------------------------------------------------------------------------------------------------------------------------------------------------------------------------------------------------------------------------------------------------------------------------------------------------------------------------------------------------------------------------------------------------------------------------------------------------------------------------------------------------------------------------------------------------------------------------------------|
| 28 | progesterone-receptor<br>negative breast cancer | 8.06E-55 | 162 | 17-5p; 182-5p; 20a-5p; 155-5p; 96-5p; 18a-5p; 1246; 19a-3p; 19b-1-5p; hsa-let-7c-5p; 17-3p; 1290; 142-5p; 183-5p; 15b-3p; hsa-let-7e-5p; 142-3p; 1260a; 744-5p; 16-2-3p; 873-5p; 93-5p; 200c-3p; 19b-3p; 582-5p; 497-5p; 146a-5p; 766-3p; 181c-5p; 106b-5p; 15b-5p; 130b-3p; 25-3p; 99a-3p; 210-3p; 9-5p; 486-5p; 425-5p; 16-5p; 125b-2-3p; 154-5p; 192-5p; 30d-5p; 381-3p; 1185-5p; 376a-3p; 376c-3p; 628-3p; 124-3p; 30a-5p; 410-3p; 486-3p; 9-3p; 127-5p; 299-5p; 31-5p; 625-3p; 655-3p; 451a; 539-5p; 769-5p; 191-5p; 136-3p; 154-3p; 125a-5p; 195-5p; 203a-3p; 369-5p; 379-5p; 128-3p; 143-3p; hsa-let-7a-5p; 218-5p; 135a-5p; 423-5p; 543; 485-3p; 26b-3p; 487b-3p; 148a-3p; 21-3p; 29b-1-5p; 656-3p; 30c-5p; 1248; 30b-5p; 99a-5p; 380-3p; 144-3p; 654-3p; 101-5p; 31-3p; 329-3p; 132-3p; 484; 130a-3p; 134-5p; 935; 98-5p; 149-5p; 625-5p; 409-5p; 758-3p; 495-3p; 15a-5p; 376a-5p; 487a-3p; 95-3p; 551b-3p; 194-5p; 411-5p; 129-2-3p; 26a-5p; 296-5p; 106a-5p; 139-5p; 425-3p; 320c; 1-3p; 132-5p; 335-3p; 144-5p; 18b-5p; 378a-3p; 629-5p; 590-5p; 432-5p; 7-5p; 320d; 127-3p; 187-3p; 409-3p; 339-5p; 382-5p; 340-3p; 204-5p; 27a-3p; 383-5p; 769-3p; 502-3p; 139-3p; 32-5p; hsa-let-7b-5p; 21-5p; 590-3p; 20b-5p; 136-5p; 30a-3p; 340-5p; 99b-3p; 338-5p; 454-3p; 28-3p; 145-5p; 370-3p; 504-5p; 125b-5p; 92b-5p; 221-5p; 99b-5p; 126-3p; 92b-3p |
| 29 | oral squamous cell<br>carcinoma                 | 1.53E-54 | 137 | 92a-3p; 106b-3p; 17-5p; 20a-5p; 155-5p; 96-5p; 18a-5p; 1246; 19a-3p; hsa-let-7c-5p; 17-3p; 1290; 142-5p; 183-5p; 15b-3p; hsa-let-7e-5p; 142-3p; 93-5p; 200c-3p; 19b-3p; 497-5p; 146a-5p; 106b-5p; 15b-5p; 130b-3p; 25-3p; 99a-3p; 210-3p; 9-5p; 486-5p; 16-5p; 125b-2-3p; 154-5p; 192-5p; 30d-5p; 381-3p; 376a-3p; 376c-3p; 628-3p; 124-3p; 30a-5p; 410-3p; 486-3p; 9-3p; 299-5p; 31-5p; 655-3p; 191-5p; 136-3p; 125a-5p; 195-5p; 203a-3p; 369-5p; 379-5p; 128-3p; 485-5p; 143-3p; hsa-let-7a-5p; 218-5p; 135a-5p; 423-5p; 543; 26b-3p; 487b-3p; 148a-3p; 21-3p; 656-3p; 30c-5p; 30b-5p; 99a-5p; 628-5p; 144-3p; 101-5p; 31-3p; 329-3p; 132-3p; 484; 130a-3p; 134-5p; 935; 98-5p; 149-5p; 625-5p; 495-3p; 15a-5p; 376a-5p; 95-3p; 411-5p; 26a-5p; 296-5p; 106a-5p; 139-5p; 320c; 1-3p; 144-5p; 33b-5p; 18b-5p; 378a-3p; 590-5p; 432-5p; 7-5p; 138-5p; 127-3p; 532-3p; 187-3p; 409-3p; 339-5p; 382-5p; 885-5p; 27b-3p; 204-5p; 27a-3p; 383-5p; 769-3p; 494-3p; 369-3p; 411-3p; 139-3p; 32-5p; hsa-let-7b-5p; 21-5p; 20b-5p; 136-5p; 30a-3p; 340-5p; 153-3p; 99b-3p; 454-3p; 23b-3p; 331-5p; 211-5p; 145-5p; 370-3p; 125b-5p; 221-5p; 126-3p; 92b-3p                                                                                                                                                                                                           |
| 30 | colon adenocarcinoma                            | 1.8E-54  | 124 | 92a-3p; 106b-3p; 17-5p; 182-5p; 20a-5p; 96-5p; 18a-5p; 19a-3p; 19b-1-5p; hsa-let-7c-5p; 17-3p; 142-5p; 183-5p; 15b-3p; hsa-let-7e-5p; 142-3p; 92a-1-5p; 744-5p; 200c-3p; 19b-3p; 582-5p; 130b-5p; 497-5p; 146a-5p; 766-3p; 181c-5p; 106b-5p; 15b-5p; 130b-3p; 25-3p; 3615; 486-5p; 16-5p; 125b-2-3p; 192-5p; 30d-5p; 30a-5p; 186-5p; 127-5p; 625-3p; 451a; 769-5p; 505-3p; 191-5p; 136-3p; 491-5p; 125a-5p; 195-5p; 203a-3p; 379-5p; 143-3p; hsa-let-7a-5p; 218-5p; 423-5p; 485-3p; 148a-3p; 21-3p; 129-5p; 29b-1-5p; 378c; 30c-5p; 30b-5p; 654-3p; 101-5p; 132-3p; 484; 130a-3p; 98-5p; 149-5p; 625-5p; 409-5p; 758-3p; 15a-5p; 95-3p; 361-3p; 194-5p; 433-3p; 26a-5p; 296-5p; 106a-5p; 139-5p; 323a-3p; 423-3p; 425-3p; 320c; 1-3p; 335-3p; 144-5p; 181d-5p; 18b-5p; 378a-3p; 590-5p; 487a-5p; 432-5p; 127-3p; 532-3p; 409-3p; 339-5p; 382-5p; 340-3p; 204-5p; 27a-3p; 494-3p; 369-3p; 376b-3p; 139-3p; 32-5p; hsa-let-7b-5p; 21-5p; 136-5p; 30a-3p; 99b-3p; 338-5p; 454-3p; 23b-3p; 28-3p; 145-5p; 370-3p; 125b-5p; 99b-5p; 126-3p; 92b-3p; 1296-5p; 1249-3p                                                                                                                                                                                                                                                                                              |
| 31 | carcinoma                                       | 4.43E-54 | 170 | 92a-3p; 106b-3p; 17-5p; 182-5p; 20a-5p; 155-5p; 96-5p; 18a-5p; 19a-3p; 19b-1-5p; 17-3p; 142-5p; 183-5p; 15b-3p; 142-3p; 92a-1-5p; 744-5p; 873-5p; 93-5p; 200c-3p; 19b-3p; 582-5p; 497-5p; 146a-5p; 181c-5p; 106b-5p; 15b-5p; 130b-3p; 25-3p; 99a-3p; 210-3p; 9-5p; 486-5p; 425-5p; 16-5p; 125b-2-3p; 154-5p; 192-5p; 30d-5p; 381-3p; 376a-3p; 376c-3p; 124-3p; 30a-5p; 410-3p; 486-3p; 186-5p; 9-3p; 127-5p; 299-5p; 31-5p; 655-3p; 451a; 539-5p; 769-5p; 505-3p; 191-5p; 136-3p; 491-5p; 125a-5p; 181c-3p; 195-5p; 203a-3p; 369-5p; 379-5p; 128-3p; 485-5p; 143-3p; hsa-let-7a-5p; 218-5p; 135a-5p; 423-5p; 543; 485-3p; 26b-3p; 487b-3p; 148a-3p; 21-3p; 129-5p; 29b-1-5p; 129-1-3p; 30c-5p; 30b-5p; 99a-5p; 628-5p; 144-3p; 654-3p; 101-5p; 31-3p; 93-3p; 329-3p; 132-3p; 484; 130a-3p; 134-5p; 935; 98-5p; 149-5p; 625-5p; 409-5p; 758-3p; 495-3p; 15a-5p; 376a-5p; 487a-3p; 95-3p; 551b-3p; 361-3p; 194-5p; 411-5p; 433-3p; 129-2-3p; 26a-5p; 296-5p; 106a-5p; 139-5p; 323a-3p; 423-3p; 320c; 1-3p; 132-5p; 33b-5p; 18b-5p; 629-5p; 590-5p; 487a-5p; 432-5p; 7-5p; 124-5p; 320d; 138-5p; 127-3p; 532-3p; 187-3p; 409-3p; 339-5p; 382-5p; 885-5p; 27b-3p; 204-5p; 27a-3p; 383-5p; 769-3p; 494-3p; 369-3p; 411-3p; 502-3p; 376b-3p; 139-3p; 32-5p; 21-5p; 590-3p; 20b-5p; 30a-3p; 340-5p; 153-3p; 338-5p; 454-3p; 23b-3p; 331-5p; 28-3p;                  |

|    |                               |          |     |                                                                                                                                                                                                                                                                                                                                                                                                                                                                                                                                                                                                                                                                                                                                                                                                                                                                                                                                                                                                                                                                                                                                                                                                                                                                                                            |
|----|-------------------------------|----------|-----|------------------------------------------------------------------------------------------------------------------------------------------------------------------------------------------------------------------------------------------------------------------------------------------------------------------------------------------------------------------------------------------------------------------------------------------------------------------------------------------------------------------------------------------------------------------------------------------------------------------------------------------------------------------------------------------------------------------------------------------------------------------------------------------------------------------------------------------------------------------------------------------------------------------------------------------------------------------------------------------------------------------------------------------------------------------------------------------------------------------------------------------------------------------------------------------------------------------------------------------------------------------------------------------------------------|
|    |                               |          |     | 211-5p; 145-5p; 370-3p; 504-5p; 125b-5p; 92b-5p; 126-3p; 92b-3p; 770-5p                                                                                                                                                                                                                                                                                                                                                                                                                                                                                                                                                                                                                                                                                                                                                                                                                                                                                                                                                                                                                                                                                                                                                                                                                                    |
| 32 | amyotrophic lateral sclerosis | 1.06E-53 | 128 | 4488; 92a-3p; 106b-3p; 17-5p; 20a-5p; 155-5p; 18a-5p; 1246; 19a-3p; hsa-let-7c-5p; 1290; 3960; 142-5p; hsa-let-7e-5p; 142-3p; 744-5p; 873-5p; 93-5p; 19b-3p; 582-5p; 146a-5p; 766-3p; 181c-5p; 106b-5p; 15b-5p; 130b-3p; 25-3p; 210-3p; 9-5p; 16-5p; 154-5p; 192-5p; 381-3p; 376a-3p; 124-3p; 127-5p; 299-5p; 31-5p; 625-3p; 655-3p; 451a; 539-5p; 505-3p; 491-5p; 125a-5p; 195-5p; 369-5p; 379-5p; 128-3p; 485-5p; 143-3p; hsa-let-7a-5p; 218-5p; 135a-5p; 423-5p; 543; 485-3p; 487b-3p; 148a-3p; 129-5p; 30c-5p; 30b-5p; 99a-5p; 380-3p; 654-3p; 329-3p; 132-3p; 484; 130a-3p; 3613-5p; 134-5p; 98-5p; 149-5p; 625-5p; 409-5p; 758-3p; 495-3p; 15a-5p; 487a-3p; 551b-3p; 194-5p; 433-3p; 129-2-3p; 26a-5p; 296-5p; 106a-5p; 139-5p; 323a-3p; 425-3p; 1-3p; 132-5p; 18b-5p; 629-5p; 487a-5p; 432-5p; 7-5p; 138-5p; 127-3p; 532-3p; 409-3p; 339-5p; 382-5p; 885-5p; 27b-3p; 204-5p; 27a-3p; 383-5p; 494-3p; 369-3p; 502-3p; 139-3p; hsa-let-7b-5p; 21-5p; 20b-5p; 340-5p; 153-3p; 99b-3p; 338-5p; 454-3p; 23b-3p; 331-5p; 28-3p; 211-5p; 145-5p; 370-3p; 504-5p; 125b-5p; 99b-5p                                                                                                                                                                                                                           |
| 33 | medulloblastoma               | 2.49E-52 | 118 | 92a-3p; 106b-3p; 17-5p; 182-5p; 20a-5p; 155-5p; 96-5p; 18a-5p; 19a-3p; hsa-let-7c-5p; 17-3p; 1290; 142-5p; 183-5p; hsa-let-7e-5p; 142-3p; 1260b; 1260a; 93-5p; 200c-3p; 19b-3p; 582-5p; 497-5p; 146a-5p; 766-3p; 181c-5p; 106b-5p; 130b-3p; 25-3p; 210-3p; 9-5p; 486-5p; 425-5p; 16-5p; 154-5p; 192-5p; 30d-5p; 376a-3p; 376c-3p; 124-3p; 30a-5p; 410-3p; 186-5p; 9-3p; 31-5p; 451a; 539-5p; 191-5p; 491-5p; 125a-5p; 181c-3p; 195-5p; 203a-3p; 379-5p; 128-3p; 143-3p; hsa-let-7a-5p; 218-5p; 4286; 135a-5p; 26b-3p; 487b-3p; 148a-3p; 21-3p; 129-5p; 30c-5p; 30b-5p; 132-3p; 130a-3p; 134-5p; 935; 98-5p; 149-5p; 495-3p; 15a-5p; 361-3p; 194-5p; 433-3p; 26a-5p; 106a-5p; 139-5p; 323a-3p; 425-3p; 320c; 1-3p; 132-5p; 144-5p; 33b-5p; 181d-5p; 432-5p; 7-5p; 138-5p; 127-3p; 187-3p; 409-3p; 382-5p; 27b-3p; 204-5p; 27a-3p; 383-5p; 494-3p; 139-3p; 32-5p; hsa-let-7b-5p; 21-5p; 20b-5p; 136-5p; 340-5p; 153-3p; 338-5p; 23b-3p; 145-5p; 370-3p; 125b-5p; 92b-5p; 221-5p; 99b-5p; 126-3p                                                                                                                                                                                                                                                                                                              |
| 34 | melanoma                      | 2.49E-52 | 154 | 92a-3p; 17-5p; 182-5p; 20a-5p; 155-5p; 96-5p; 18a-5p; 19a-3p; hsa-let-7c-5p; 17-3p; 1290; 142-5p; 183-5p; 15b-3p; hsa-let-7e-5p; 142-3p; 92a-1-5p; 744-5p; 873-5p; 93-5p; 200c-3p; 19b-3p; 582-5p; 130b-5p; 497-5p; 146a-5p; 766-3p; 181c-5p; 106b-5p; 15b-5p; 130b-3p; 25-3p; 99a-3p; 210-3p; 9-5p; 486-5p; 425-5p; 16-5p; 125b-2-3p; 154-5p; 192-5p; 30d-5p; 381-3p; 1185-5p; 376a-3p; 376c-3p; 1285-3p; 124-3p; 30a-5p; 410-3p; 486-3p; 186-5p; 9-3p; 299-5p; 31-5p; 655-3p; 451a; 539-5p; 191-5p; 154-3p; 491-5p; 125a-5p; 195-5p; 203a-3p; 369-5p; 379-5p; 128-3p; 485-5p; 143-3p; hsa-let-7a-5p; 218-5p; 135a-5p; 485-3p; 26b-3p; 487b-3p; 148a-3p; 21-3p; 129-5p; 30c-5p; 1248; 30b-5p; 99a-5p; 628-5p; 144-3p; 101-5p; 329-3p; 132-3p; 484; 130a-3p; 134-5p; 98-5p; 149-5p; 625-5p; 409-5p; 758-3p; 495-3p; 15a-5p; 487a-3p; 95-3p; 194-5p; 411-5p; 433-3p; 26a-5p; 296-5p; 106a-5p; 139-5p; 323a-3p; 423-3p; 425-3p; 1-3p; 132-5p; 335-3p; 33b-5p; 181d-5p; 18b-5p; 378a-3p; 629-5p; 590-5p; 7-5p; 138-5p; 127-3p; 409-3p; 339-5p; 382-5p; 885-5p; 27b-3p; 204-5p; 27a-3p; 383-5p; 769-3p; 494-3p; 369-3p; 32-5p; hsa-let-7b-5p; 21-5p; 20b-5p; 136-5p; 30a-3p; 340-5p; 338-5p; 454-3p; 23b-3p; 211-5p; 145-5p; 370-3p; 504-5p; 125b-5p; 92b-5p; 221-5p; 99b-5p; 126-3p; 770-5p; 1296-5p; 1249-3p |

|    |                           |          |     |                                                                                                                                                                                                                                                                                                                                                                                                                                                                                                                                                                                                                                                                                                                                                                                                                                                                                                                                                                                                                                                                                                                                                                                                                                                                                                                                                                                                                              |
|----|---------------------------|----------|-----|------------------------------------------------------------------------------------------------------------------------------------------------------------------------------------------------------------------------------------------------------------------------------------------------------------------------------------------------------------------------------------------------------------------------------------------------------------------------------------------------------------------------------------------------------------------------------------------------------------------------------------------------------------------------------------------------------------------------------------------------------------------------------------------------------------------------------------------------------------------------------------------------------------------------------------------------------------------------------------------------------------------------------------------------------------------------------------------------------------------------------------------------------------------------------------------------------------------------------------------------------------------------------------------------------------------------------------------------------------------------------------------------------------------------------|
| 35 | lymphoma                  | 4.12E-52 | 145 | <p>92a-3p; 106b-3p; 17-5p; 182-5p; 20a-5p; 155-5p; 96-5p; 18a-5p; 19a-3p; 19b-1-5p; 17-3p; 142-5p; 183-5p; 15b-3p; 142-3p; 92a-1-5p; 744-5p; 16-2-3p; 873-5p; 93-5p; 200c-3p; 19b-3p; 582-5p; 130b-5p; 497-5p; 146a-5p; 181c-5p; 106b-5p; 15b-5p; 130b-3p; 25-3p; 9-5p; 486-5p; 425-5p; 16-5p; 192-5p; 30d-5p; 381-3p; 376a-3p; 376c-3p; 30a-5p; 410-3p; 486-3p; 186-5p; 9-3p; 127-5p; 299-5p; 31-5p; 625-3p; 451a; 539-5p; 769-5p; 505-3p; 191-5p; 154-3p; 125a-5p; 181c-3p; 195-5p; 203a-3p; 379-5p; 128-3p; 143-3p; hsa-let-7a-5p; 485-3p; 26b-3p; 487b-3p; 148a-3p; 21-3p; 29b-1-5p; 129-1-3p; 30c-5p; 30b-5p; 99a-5p; 628-5p; 144-3p; 654-3p; 101-5p; 93-3p; 132-3p; 484; 130a-3p; 134-5p; 98-5p; 149-5p; 625-5p; 409-5p; 758-3p; 15a-5p; 487a-3p; 95-3p; 551b-3p; 361-3p; 194-5p; 411-5p; 433-3p; 129-2-3p; 26a-5p; 296-5p; 106a-5p; 139-5p; 423-3p; 425-3p; 1-3p; 132-5p; 18b-5p; 378a-3p; 629-5p; 590-5p; 7-5p; 124-5p; 138-5p; 532-3p; 339-5p; 382-5p; 27b-3p; 340-3p; 204-5p; 27a-3p; 769-3p; 494-3p; 411-3p; 502-3p; 139-3p; 32-5p; hsa-let-7b-5p; 21-5p; 590-3p; 20b-5p; 30a-3p; 340-5p; 99b-3p; 338-5p; 454-3p; 23b-3p; 28-3p; 211-5p; 145-5p; 370-3p; 125b-5p; 92b-5p; 221-5p; 99b-5p; 126-3p; 92b-3p; 770-5p</p>                                                                                                                                                                                              |
| 36 | Burkitt lymphoma          | 1.65E-51 | 95  | <p>92a-3p; 106b-3p; 17-5p; 182-5p; 20a-5p; 155-5p; 96-5p; 18a-5p; 19a-3p; hsa-let-7c-5p; 17-3p; 142-5p; 183-5p; hsa-let-7e-5p; 142-3p; 93-5p; 200c-3p; 19b-3p; 130b-5p; 497-5p; 146a-5p; 181c-5p; 106b-5p; 15b-5p; 130b-3p; 25-3p; 210-3p; 9-5p; 486-5p; 16-5p; 30d-5p; 376c-3p; 124-3p; 30a-5p; 410-3p; 31-5p; 191-5p; 136-3p; 154-3p; 181c-3p; 203a-3p; 128-3p; 143-3p; hsa-let-7a-5p; 218-5p; 543; 485-3p; 148a-3p; 129-5p; 30c-5p; 30b-5p; 99a-5p; 144-3p; 93-3p; 132-3p; 484; 130a-3p; 134-5p; 98-5p; 15a-5p; 95-3p; 361-3p; 194-5p; 129-2-3p; 26a-5p; 106a-5p; 139-5p; 323a-3p; 423-3p; 1-3p; 132-5p; 335-3p; 378a-3p; 7-5p; 124-5p; 138-5p; 127-3p; 187-3p; 409-3p; 339-5p; 27b-3p; 204-5p; 27a-3p; 383-5p; 494-3p; hsa-let-7b-5p; 21-5p; 136-5p; 30a-3p; 340-5p; 153-3p; 145-5p; 125b-5p; 99b-5p; 126-3p</p>                                                                                                                                                                                                                                                                                                                                                                                                                                                                                                                                                                                                         |
| 37 | brain disease             | 1.74E-51 | 166 | <p>92a-3p; 106b-3p; 17-5p; 182-5p; 20a-5p; 155-5p; 96-5p; 18a-5p; 19a-3p; 19b-1-5p; 17-3p; 142-5p; 183-5p; 15b-3p; 142-3p; 92a-1-5p; 744-5p; 873-5p; 93-5p; 200c-3p; 19b-3p; 582-5p; 130b-5p; 497-5p; 146a-5p; 181c-5p; 106b-5p; 15b-5p; 130b-3p; 25-3p; 99a-3p; 210-3p; 9-5p; 486-5p; 425-5p; 16-5p; 125b-2-3p; 154-5p; 192-5p; 30d-5p; 381-3p; 376a-3p; 376c-3p; 628-3p; 124-3p; 30a-5p; 410-3p; 486-3p; 186-5p; 127-5p; 299-5p; 31-5p; 655-3p; 451a; 769-5p; 505-3p; 191-5p; 136-3p; 154-3p; 491-5p; 125a-5p; 181c-3p; 195-5p; 369-5p; 379-5p; 128-3p; 485-5p; 143-3p; hsa-let-7a-5p; 218-5p; 135a-5p; 423-5p; 543; 485-3p; 487b-3p; 148a-3p; 21-3p; 129-5p; 30c-5p; 30b-5p; 99a-5p; 628-5p; 144-3p; 654-3p; 101-5p; 31-3p; 93-3p; 329-3p; 132-3p; 484; 130a-3p; 134-5p; 935; 98-5p; 149-5p; 625-5p; 409-5p; 758-3p; 495-3p; 15a-5p; 376a-5p; 487a-3p; 95-3p; 551b-3p; 361-3p; 194-5p; 411-5p; 433-3p; 129-2-3p; 26a-5p; 296-5p; 106a-5p; 139-5p; 323a-3p; 423-3p; 425-3p; 1-3p; 144-5p; 33b-5p; 18b-5p; 629-5p; 590-5p; 487a-5p; 432-5p; 7-5p; 124-5p; 138-5p; 127-3p; 532-3p; 187-3p; 409-3p; 339-5p; 382-5p; 885-5p; 27b-3p; 204-5p; 27a-3p; 383-5p; 769-3p; 494-3p; 369-3p; 502-3p; 376b-3p; 139-3p; 32-5p; 21-5p; 590-3p; 20b-5p; 136-5p; 30a-3p; 340-5p; 153-3p; 338-5p; 454-3p; 23b-3p; 331-5p; 211-5p; 145-5p; 370-3p; 504-5p; 125b-5p; 92b-5p; 99b-5p; 126-3p; 92b-3p; 770-5p</p>                                |
| 38 | neurodegenerative disease | 6.57E-51 | 169 | <p>92a-3p; 106b-3p; 17-5p; 182-5p; 20a-5p; 155-5p; 96-5p; 18a-5p; 19a-3p; 19b-1-5p; 17-3p; 142-5p; 183-5p; 15b-3p; 142-3p; 92a-1-5p; 744-5p; 873-5p; 93-5p; 200c-3p; 19b-3p; 582-5p; 130b-5p; 497-5p; 146a-5p; 181c-5p; 15b-5p; 130b-3p; 25-3p; 210-3p; 9-5p; 486-5p; 425-5p; 16-5p; 125b-2-3p; 154-5p; 192-5p; 30d-5p; 381-3p; 376a-3p; 376c-3p; 628-3p; 124-3p; 30a-5p; 410-3p; 486-3p; 186-5p; 9-3p; 127-5p; 299-5p; 31-5p; 655-3p; 451a; 769-5p; 505-3p; 191-5p; 136-3p; 154-3p; 491-5p; 125a-5p; 181c-3p; 195-5p; 203a-3p; 369-5p; 379-5p; 128-3p; 485-5p; 143-3p; hsa-let-7a-5p; 218-5p; 135a-5p; 423-5p; 543; 485-3p; 26b-3p; 487b-3p; 148a-3p; 21-3p; 129-5p; 29b-1-5p; 30c-5p; 30b-5p; 99a-5p; 628-5p; 144-3p; 654-3p; 101-5p; 31-3p; 93-3p; 329-3p; 132-3p; 484; 130a-3p; 134-5p; 935; 98-5p; 149-5p; 625-5p; 409-5p; 758-3p; 495-3p; 15a-5p; 376a-5p; 487a-3p; 95-3p; 551b-3p; 361-3p; 194-5p; 411-5p; 433-3p; 129-2-3p; 26a-5p; 296-5p; 106a-5p; 139-5p; 323a-3p; 423-3p; 425-3p; 1-3p; 335-3p; 144-5p; 33b-5p; 629-5p; 590-5p; 487a-5p; 432-5p; 7-5p; 124-5p; 138-5p; 532-3p; 187-3p; 409-3p; 339-5p; 382-5p; 885-5p; 27b-3p; 204-5p; 27a-3p; 383-5p; 769-3p; 494-3p; 369-3p; 502-3p; 376b-3p; 139-3p; 32-5p; 21-5p; 590-3p; 20b-5p; 136-5p; 30a-3p; 340-5p; 153-3p; 99b-3p; 338-5p; 454-3p; 23b-3p; 331-5p; 28-3p; 211-5p; 145-5p; 370-3p; 504-5p; 125b-5p; 92b-5p; 221-5p; 99b-5p; 126-3p; 92b-3p; 770-5p</p> |

|    |                          |          |     |                                                                                                                                                                                                                                                                                                                                                                                                                                                                                                                                                                                                                                                                                                                                                                                                                                                                                                                                                                                                                                                                                                                                                                                                                                                                                                                                                                                                     |
|----|--------------------------|----------|-----|-----------------------------------------------------------------------------------------------------------------------------------------------------------------------------------------------------------------------------------------------------------------------------------------------------------------------------------------------------------------------------------------------------------------------------------------------------------------------------------------------------------------------------------------------------------------------------------------------------------------------------------------------------------------------------------------------------------------------------------------------------------------------------------------------------------------------------------------------------------------------------------------------------------------------------------------------------------------------------------------------------------------------------------------------------------------------------------------------------------------------------------------------------------------------------------------------------------------------------------------------------------------------------------------------------------------------------------------------------------------------------------------------------|
| 39 | rectum adenocarcinoma    | 8.6E-51  | 117 | 92a-3p; 106b-3p; 17-5p; 182-5p; 20a-5p; 155-5p; 96-5p; 19a-3p; 19b-1-5p; hsa-let-7c-5p; 17-3p; 142-5p; 183-5p; 15b-3p; 142-3p; 744-5p; 16-2-3p; 19b-3p; 582-5p; 497-5p; 146a-5p; 766-3p; 106b-5p; 15b-5p; 130b-3p; 25-3p; 3615; 486-5p; 425-5p; 16-5p; 125b-2-3p; 192-5p; 30d-5p; 381-3p; 30a-5p; 186-5p; 127-5p; 31-5p; 625-3p; 451a; 539-5p; 769-5p; 505-3p; 136-3p; 491-5p; 125a-5p; 195-5p; 203a-3p; 379-5p; 143-3p; 218-5p; 423-5p; 485-3p; 26b-3p; 148a-3p; 21-3p; 129-5p; 378c; 30c-5p; 1248; 30b-5p; 101-5p; 31-3p; 132-3p; 484; 130a-3p; 98-5p; 149-5p; 382-3p; 409-5p; 758-3p; 15a-5p; 376a-5p; 361-3p; 194-5p; 433-3p; 26a-5p; 296-5p; 106a-5p; 139-5p; 323a-3p; 423-3p; 1-3p; 3065-5p; 335-3p; 144-5p; 181d-5p; 378a-3p; 590-5p; 487a-5p; 432-5p; 127-3p; 532-3p; 339-5p; 27a-3p; 769-3p; 369-3p; 411-3p; 139-3p; 32-5p; hsa-let-7b-5p; 21-5p; 20b-5p; 136-5p; 30a-3p; 99b-3p; 338-5p; 28-3p; 145-5p; 370-3p; 125b-5p; 99b-5p; 126-3p; 323b-3p; 92b-3p; 1296-5p; 1249-3p                                                                                                                                                                                                                                                                                                                                                                                                                |
| 40 | adrenocortical carcinoma | 1.89E-50 | 89  | 92a-3p; 17-5p; 182-5p; 20a-5p; 155-5p; 18a-5p; 19a-3p; 142-5p; 183-5p; 15b-3p; 142-3p; 93-5p; 200c-3p; 19b-3p; 497-5p; 146a-5p; 15b-5p; 130b-3p; 9-5p; 486-5p; 154-5p; 192-5p; 381-3p; 376a-3p; 376c-3p; 124-3p; 30a-5p; 410-3p; 127-5p; 299-5p; 31-5p; 655-3p; 539-5p; 136-3p; 154-3p; 491-5p; 125a-5p; 195-5p; 369-5p; 379-5p; 143-3p; hsa-let-7a-5p; 218-5p; 543; 485-3p; 487b-3p; 148a-3p; 656-3p; 378c; 99a-5p; 380-3p; 654-3p; 329-3p; 132-3p; 484; 130a-3p; 134-5p; 98-5p; 382-3p; 409-5p; 758-3p; 495-3p; 15a-5p; 376a-5p; 487a-3p; 411-5p; 433-3p; 139-5p; 323a-3p; 33b-5p; 487a-5p; 432-5p; 127-3p; 409-3p; 382-5p; 27a-3p; 494-3p; 369-3p; 411-3p; 502-3p; 376b-3p; 21-5p; 136-5p; 340-5p; 23b-3p; 145-5p; 370-3p; 126-3p; 323b-3p                                                                                                                                                                                                                                                                                                                                                                                                                                                                                                                                                                                                                                                       |
| 41 | urinary bladder cancer   | 2.34E-50 | 88  | 106b-3p; 17-5p; 182-5p; 20a-5p; 155-5p; 96-5p; 19a-3p; hsa-let-7c-5p; 142-5p; 183-5p; 142-3p; 744-5p; 93-5p; 200c-3p; 19b-3p; 497-5p; 146a-5p; 106b-5p; 15b-5p; 130b-3p; 25-3p; 210-3p; 9-5p; 425-5p; 16-5p; 125b-2-3p; 154-5p; 192-5p; 381-3p; 376a-3p; 376c-3p; 124-3p; 30a-5p; 186-5p; 299-5p; 31-5p; 451a; 195-5p; 203a-3p; 379-5p; 143-3p; hsa-let-7a-5p; 218-5p; 135a-5p; 487b-3p; 148a-3p; 21-3p; 129-5p; 30c-5p; 30b-5p; 99a-5p; 144-3p; 654-3p; 132-3p; 130a-3p; 134-5p; 495-3p; 15a-5p; 194-5p; 26a-5p; 139-5p; 423-3p; 320c; 1-3p; 181d-5p; 432-5p; 7-5p; 127-3p; 532-3p; 409-3p; 27b-3p; 340-3p; 204-5p; 27a-3p; 494-3p; 502-3p; 139-3p; 21-5p; 20b-5p; 136-5p; 30a-3p; 23b-3p; 28-3p; 145-5p; 125b-5p; 221-5p; 99b-5p; 126-3p                                                                                                                                                                                                                                                                                                                                                                                                                                                                                                                                                                                                                                                          |
| 42 | B-cell lymphoma          | 3.04E-48 | 103 | 92a-3p; 106b-3p; 17-5p; 182-5p; 20a-5p; 155-5p; 96-5p; 18a-5p; 19a-3p; hsa-let-7c-5p; 17-3p; 142-5p; 183-5p; hsa-let-7e-5p; 142-3p; 1260a; 93-5p; 200c-3p; 19b-3p; 582-5p; 146a-5p; 181c-5p; 106b-5p; 15b-5p; 130b-3p; 25-3p; 210-3p; 9-5p; 486-5p; 16-5p; 192-5p; 30d-5p; 376a-3p; 376c-3p; 124-3p; 30a-5p; 186-5p; 9-3p; 31-5p; 451a; 191-5p; 125a-5p; 195-5p; 203a-3p; 143-3p; hsa-let-7a-5p; 218-5p; 148a-3p; 129-5p; 29b-1-5p; 30c-5p; 30b-5p; 99a-5p; 144-3p; 130a-3p; 134-5p; 98-5p; 15a-5p; 95-3p; 551b-3p; 194-5p; 26a-5p; 296-5p; 106a-5p; 139-5p; 323a-3p; 423-3p; 320c; 1-3p; 18b-5p; 378a-3p; 432-5p; 7-5p; 320d; 138-5p; 127-3p; 532-3p; 187-3p; 339-5p; 27b-3p; 204-5p; 27a-3p; 494-3p; 369-3p; 502-3p; 32-5p; hsa-let-7b-5p; 21-5p; 20b-5p; 136-5p; 30a-3p; 153-3p; 338-5p; 454-3p; 23b-3p; 211-5p; 145-5p; 504-5p; 125b-5p; 221-5p; 99b-5p; 126-3p; 770-5p                                                                                                                                                                                                                                                                                                                                                                                                                                                                                                                         |
| 43 | malignant glioma         | 1.16E-46 | 166 | 92a-3p; 106b-3p; 17-5p; 182-5p; 20a-5p; 155-5p; 96-5p; 18a-5p; 1246; 19a-3p; hsa-let-7c-5p; 17-3p; 142-5p; 183-5p; hsa-let-7e-5p; 142-3p; 1260b; 1260a; 744-5p; 93-5p; 200c-3p; 19b-3p; 582-5p; 497-5p; 146a-5p; 766-3p; 181c-5p; 106b-5p; 15b-5p; 130b-3p; 25-3p; 210-3p; 9-5p; 486-5p; 425-5p; 16-5p; 154-5p; 192-5p; 30d-5p; 381-3p; 376a-3p; 376c-3p; 628-3p; 1285-3p; 124-3p; 30a-5p; 410-3p; 186-5p; 9-3p; 299-5p; 31-5p; 655-3p; 451a; 539-5p; 769-5p; 505-3p; 191-5p; 154-3p; 491-5p; 125a-5p; 181c-3p; 195-5p; 203a-3p; 369-5p; 379-5p; 128-3p; 485-5p; 143-3p; hsa-let-7a-5p; 218-5p; 4286; 135a-5p; 423-5p; 543; 485-3p; 487b-3p; 148a-3p; 21-3p; 129-5p; 29b-1-5p; 129-1-3p; 656-3p; 30c-5p; 1248; 30b-5p; 99a-5p; 380-3p; 144-3p; 31-3p; 329-3p; 132-3p; 484; 130a-3p; 134-5p; 98-5p; 149-5p; 625-5p; 409-5p; 758-3p; 495-3p; 15a-5p; 376a-5p; 487a-3p; 95-3p; 551b-3p; 194-5p; 411-5p; 433-3p; 129-2-3p; 26a-5p; 296-5p; 106a-5p; 139-5p; 323a-3p; 423-3p; 425-3p; 320c; 1-3p; 33b-5p; 181d-5p; 18b-5p; 378a-3p; 629-5p; 590-5p; 487a-5p; 432-5p; 7-5p; 138-5p; 127-3p; 187-3p; 409-3p; 339-5p; 382-5p; 885-5p; 27b-3p; 204-5p; 27a-3p; 383-5p; 769-3p; 494-3p; 369-3p; 376b-3p; 32-5p; hsa-let-7b-5p; 21-5p; 590-3p; 20b-5p; 136-5p; 30a-3p; 340-5p; 153-3p; 338-5p; 454-3p; 23b-3p; 28-3p; 211-5p; 145-5p; 370-3p; 504-5p; 125b-5p; 221-5p; 99b-5p; 126-3p; 92b-3p; 770-5p; 1296-5p |

\*p-value after the Benjamini-Hochberg adjustment
