# Supplementary material for: A Set of 17 microRNAs Common for Brain and Cerebrospinal Fluid Differentiates Primary Central Nervous System Lymphoma from Non-Malignant Brain Tumors
Source: MDPI journal article supplement (doi:10.3390/biom11091395), 2021-09-21
Supplement: s1 [file s1]

## Supplementary Table S10

CNS DLBCL-specific CSF microRNAs and signaling pathways. Processes specific for carcinogenesis and lymphoma-related disorders, are marked bold.

| <b>Reactome (miRPathDB)</b> |                                                    |                  |                                |                                                                                                     |
|-----------------------------|----------------------------------------------------|------------------|--------------------------------|-----------------------------------------------------------------------------------------------------|
| <b>No</b>                   | <b>subcategory</b>                                 | <b>q-value*</b>  | <b>number of miRs observed</b> | <b>hsa-miRs</b>                                                                                     |
| <b>1</b>                    | <b>PTEN Regulation</b>                             | <b>8.495E-07</b> | <b>11</b>                      | <b>19a-3p; 16-5p; 148a-3p; 15a-5p; 19b-3p; 221-3p; 21-5p; 9-3p; 92a-3p; 20a-5p; 26a-5p</b>          |
| 2                           | Intracellular signaling by second messengers       | 2.889E-06        | 12                             | 19a-3p; 16-5p; 148a-3p; 15a-5p; 19b-3p; 221-3p; 21-5p; 9-3p; 15b-5p; 92a-3p; 20a-5p; 26a-5p         |
| <b>3</b>                    | <b>PIP3 activates AKT signaling</b>                | <b>2.889E-06</b> | <b>12</b>                      | <b>19a-3p; 16-5p; 148a-3p; 15a-5p; 19b-3p; 221-3p; 21-5p; 9-3p; 15b-5p; 92a-3p; 20a-5p; 26a-5p</b>  |
| <b>4</b>                    | <b>Transcriptional Regulation by TP53</b>          | <b>2.889E-06</b> | <b>12</b>                      | <b>19a-3p; 16-5p; 148a-3p; 15a-5p; 19b-3p; 221-3p; 21-5p; 15b-5p; 17-3p; 92a-3p; 20a-5p; 26a-5p</b> |
| <b>5</b>                    | <b>Signal Transduction</b>                         | <b>7.223E-06</b> | <b>12</b>                      | <b>19a-3p; 16-5p; 148a-3p; 15a-5p; 19b-3p; 221-3p; 21-5p; 9-3p; 15b-5p; 9-5p; 20a-5p; 26a-5p</b>    |
| 6                           | Immune System                                      | 3.434E-05        | 10                             | 19a-3p; 16-5p; 148a-3p; 15a-5p; 221-3p; 21-5p; 9-3p; 15b-5p; 17-3p; 20a-5p                          |
| 7                           | Oxidative Stress Induced Senescence                | 5.562E-05        | 11                             | 19a-3p; 16-5p; 15a-5p; 221-3p; 423-5p; 21-5p; 9-3p; 15b-5p; 92a-3p; 20a-5p; 26a-5p                  |
| <b>8</b>                    | <b>Signaling by TGF-beta family members</b>        | <b>6.878E-05</b> | <b>9</b>                       | <b>19a-3p; 16-5p; 148a-3p; 15a-5p; 19b-3p; 21-5p; 15b-5p; 92a-3p; 20a-5p</b>                        |
| <b>9</b>                    | <b>Pre-NOTCH Expression and Processing</b>         | <b>9.273E-05</b> | <b>9</b>                       | <b>16-5p; 148a-3p; 15a-5p; 221-3p; 9-3p; 15b-5p; 92a-3p; 9-5p; 20a-5p</b>                           |
| 10                          | Estrogen-dependent gene expression                 | 0.0001196        | 10                             | 19a-3p; 16-5p; 148a-3p; 15a-5p; 221-3p; 21-5p; 15b-5p; 17-3p; 92a-3p; 26a-5p                        |
| 11                          | Intra-Golgi and retrograde Golgi-to-ER traffic     | 0.0001196        | 5                              | 16-5p; 148a-3p; 15a-5p; 15b-5p; 92a-3p                                                              |
| 12                          | ESR-mediated signaling                             | 0.0001264        | 11                             | 19a-3p; 16-5p; 148a-3p; 15a-5p; 221-3p; 21-5p; 15b-5p; 17-3p; 92a-3p; 9-5p; 26a-5p                  |
| 13                          | Deubiquitination                                   | 0.0001283        | 8                              | 19a-3p; 16-5p; 15a-5p; 19b-3p; 221-3p; 15b-5p; 92a-3p; 20a-5p                                       |
| <b>14</b>                   | <b>Regulation of RUNX1 Expression and Activity</b> | <b>0.0001283</b> | <b>10</b>                      | <b>19a-3p; 16-5p; 148a-3p; 15a-5p; 19b-3p; 221-3p; 21-5p; 15b-5p; 20a-5p; 26a-5p</b>                |
| <b>15</b>                   | <b>Mitotic G1-G1S phases</b>                       | <b>0.0001313</b> | <b>8</b>                       | <b>16-5p; 15a-5p; 221-3p; 423-5p; 15b-5p; 92a-3p; 20a-5p; 26a-5p</b>                                |
| 16                          | Vesicle-mediated transport                         | 0.0002082        | 7                              | 19a-3p; 16-5p; 148a-3p; 15a-5p; 15b-5p; 92a-3p; 20a-5p                                              |

| <b>KEGG (miRPathDB)</b> |                            |                  |                                |                                                                                                                |
|-------------------------|----------------------------|------------------|--------------------------------|----------------------------------------------------------------------------------------------------------------|
| <b>No</b>               | <b>subcategory</b>         | <b>q-value</b>   | <b>number of miRs observed</b> | <b>hsa-miRs</b>                                                                                                |
| 1                       | Prostate cancer            | 9.729E-05        | 13                             | 19a-3p; 16-5p; 148a-3p; 15a-5p; 221-3p; 21-5p; 9-3p; 15b-5p; 92a-3p; 25-3p; 9-5p; 20a-5p; 26a-5p               |
| <b>2</b>                | <b>MicroRNAs in cancer</b> | <b>0.0001047</b> | <b>14</b>                      | <b>19a-3p; 16-5p; 148a-3p; 15a-5p; 221-3p; 21-5p; 9-3p; 15b-5p; 17-3p; 92a-3p; 25-3p; 9-5p; 20a-5p; 26a-5p</b> |
| 3                       | Small cell lung cancer     | 0.0001047        | 10                             | 19a-3p; 16-5p; 148a-3p; 15a-5p; 221-3p; 21-5p; 9-3p; 15b-5p; 20a-5p; 26a-5p                                    |
| 4                       | Viral carcinogenesis       | 0.0001047        | 11                             | 19a-3p; 16-5p; 148a-3p; 15a-5p; 221-3p; 423-5p; 9-3p; 15b-5p; 92a-3p; 25-3p; 26a-5p                            |
| 5                       | Hepatitis B                | 0.0004127        | 11                             | 19a-3p; 16-5p; 148a-3p; 15a-5p; 221-3p; 21-5p; 9-3p; 15b-5p; 25-3p; 20a-5p; 26a-5p                             |
| <b>6</b>                | <b>Pathways in cancer</b>  | <b>0.0005077</b> | <b>12</b>                      | <b>19a-3p; 16-5p; 148a-3p; 15a-5p; 221-3p; 21-5p; 9-3p; 15b-5p; 92a-3p; 9-5p; 20a-5p; 26a-5p</b>               |
| 7                       | HTLV-I infection           | 0.0006449        | 9                              | 19a-3p; 16-5p; 148a-3p; 15a-5p; 221-3p; 21-5p; 15b-5p; 9-5p; 26a-5p                                            |

|           |                                         |                  |           |                                                                                      |
|-----------|-----------------------------------------|------------------|-----------|--------------------------------------------------------------------------------------|
| 8         | Melanoma                                | 0.0006449        | 10        | 19a-3p; 16-5p; 15a-5p; 221-3p; 21-5p; 9-3p; 15b-5p; 25-3p; 20a-5p; 26a-5p            |
| <b>9</b>  | <b>p53 signaling pathway</b>            | <b>0.0006449</b> | <b>10</b> | <b>19a-3p; 16-5p; 148a-3p; 15a-5p; 19b-3p; 221-3p; 21-5p; 15b-5p; 20a-5p; 26a-5p</b> |
| 10        | Bladder cancer                          | 0.0008959        | 9         | 19a-3p; 16-5p; 148a-3p; 221-3p; 21-5p; 9-3p; 15b-5p; 25-3p; 20a-5p                   |
| <b>11</b> | <b>Cell cycle</b>                       | <b>0.0008959</b> | <b>10</b> | <b>16-5p; 148a-3p; 15a-5p; 221-3p; 423-5p; 21-5p; 15b-5p; 92a-3p; 20a-5p; 26a-5p</b> |
| 12        | Influenza A                             | 0.0008959        | 6         | 19a-3p; 16-5p; 15a-5p; 221-3p; 21-5p; 15b-5p                                         |
| 13        | Toxoplasmosis                           | 0.0009062        | 6         | 19a-3p; 148a-3p; 15a-5p; 21-5p; 9-3p; 15b-5p                                         |
| 14        | Epstein-Barr virus infection            | 0.0009714        | 8         | 19a-3p; 16-5p; 148a-3p; 15a-5p; 221-3p; 21-5p; 15b-5p; 92a-3p                        |
| 15        | Acute myeloid leukemia                  | 0.0014885        | 7         | 19a-3p; 16-5p; 148a-3p; 15a-5p; 221-3p; 9-3p; 15b-5p                                 |
| 16        | Chronic myeloid leukemia                | 0.0014885        | 10        | 19a-3p; 16-5p; 148a-3p; 15a-5p; 221-3p; 21-5p; 9-3p; 15b-5p; 20a-5p; 26a-5p          |
| 17        | Measles                                 | 0.0014885        | 7         | 19a-3p; 16-5p; 15a-5p; 221-3p; 21-5p; 15b-5p; 26a-5p                                 |
| 18        | Pancreatic cancer                       | 0.0014885        | 9         | 19a-3p; 16-5p; 148a-3p; 15a-5p; 221-3p; 21-5p; 9-3p; 15b-5p; 20a-5p                  |
| 19        | Hippo signaling pathway                 | 0.0028012        | 7         | 19a-3p; 16-5p; 148a-3p; 15a-5p; 221-3p; 21-5p; 15b-5p                                |
| 20        | Non-small cell lung cancer              | 0.0029488        | 8         | 19a-3p; 16-5p; 15a-5p; 221-3p; 21-5p; 9-3p; 15b-5p; 26a-5p                           |
| 21        | Prolactin signaling pathway             | 0.0029488        | 7         | 19a-3p; 19b-3p; 221-3p; 21-5p; 9-3p; 15b-5p; 26a-5p                                  |
| 22        | Colorectal cancer                       | 0.0046909        | 8         | 19a-3p; 16-5p; 148a-3p; 15a-5p; 221-3p; 21-5p; 15b-5p; 20a-5p                        |
| <b>23</b> | <b>FoxO signaling pathway</b>           | <b>0.0046909</b> | <b>9</b>  | <b>19a-3p; 16-5p; 148a-3p; 15a-5p; 221-3p; 21-5p; 15b-5p; 9-5p; 26a-5p</b>           |
| 24        | Insulin signaling pathway               | 0.0050551        | 6         | 19a-3p; 16-5p; 15a-5p; 9-3p; 15b-5p; 26a-5p                                          |
| <b>25</b> | <b>Neurotrophin signaling pathway</b>   | <b>0.0050551</b> | <b>7</b>  | <b>19a-3p; 16-5p; 148a-3p; 15a-5p; 21-5p; 9-3p; 15b-5p</b>                           |
| <b>26</b> | <b>PI3K-Akt signaling pathway</b>       | <b>0.0065548</b> | <b>8</b>  | <b>19a-3p; 16-5p; 148a-3p; 15a-5p; 221-3p; 21-5p; 15b-5p; 26a-5p</b>                 |
| 27        | Oocyte meiosis                          | 0.0065806        | 5         | 16-5p; 15a-5p; 9-3p; 15b-5p; 26a-5p                                                  |
| <b>28</b> | <b>TNF signaling pathway</b>            | <b>0.0065806</b> | <b>5</b>  | <b>19a-3p; 15a-5p; 221-3p; 21-5p; 9-3p</b>                                           |
| 29        | Endometrial cancer                      | 0.0105322        | 7         | 19a-3p; 15a-5p; 221-3p; 21-5p; 9-3p; 15b-5p; 25-3p                                   |
| <b>30</b> | <b>Ubiquitin mediated proteolysis</b>   | <b>0.0114871</b> | <b>3</b>  | <b>16-5p; 15a-5p; 15b-5p</b>                                                         |
| 31        | Glioma                                  | 0.0115167        | 8         | 19a-3p; 16-5p; 221-3p; 21-5p; 9-3p; 15b-5p; 20a-5p; 26a-5p                           |
| 32        | Non-alcoholic fatty liver disease NAFLD | 0.0115167        | 4         | 19a-3p; 148a-3p; 221-3p; 21-5p                                                       |
| 33        | Proteoglycans in cancer                 | 0.0116473        | 8         | 19a-3p; 16-5p; 148a-3p; 221-3p; 21-5p; 9-3p; 15b-5p; 26a-5p                          |
| 34        | Leishmaniasis                           | 0.0116859        | 3         | 21-5p; 9-3p; 15b-5p                                                                  |
| <b>35</b> | <b>RNA degradation</b>                  | <b>0.0116859</b> | <b>3</b>  | <b>19a-3p; 148a-3p; 92a-3p</b>                                                       |
| 36        | Renal cell carcinoma                    | 0.0142412        | 6         | 19a-3p; 16-5p; 15a-5p; 21-5p; 9-3p; 15b-5p                                           |
| <b>37</b> | <b>Wnt signaling pathway</b>            | <b>0.0147174</b> | <b>5</b>  | <b>19a-3p; 148a-3p; 15a-5p; 15b-5p; 26a-5p</b>                                       |
| <b>38</b> | <b>TGF-beta signaling pathway</b>       | <b>0.0174426</b> | <b>5</b>  | <b>19a-3p; 148a-3p; 21-5p; 15b-5p; 20a-5p</b>                                        |
| 39        | Shigellosis                             | 0.017775         | 4         | 19a-3p; 148a-3p; 15a-5p; 9-3p                                                        |
| 40        | Pathogenic Escherichia coli infection   | 0.0188539        | 4         | 221-3p; 423-5p; 92a-3p; 25-3p                                                        |
| 41        | Chagas disease American trypanosomiasis | 0.0199664        | 4         | 19a-3p; 21-5p; 9-3p; 15b-5p                                                          |
| <b>42</b> | <b>ErbB signaling pathway</b>           | <b>0.0203374</b> | <b>6</b>  | <b>19a-3p; 16-5p; 15a-5p; 221-3p; 9-3p; 15b-5p</b>                                   |
| 43        | Tuberculosis                            | 0.0277519        | 3         | 221-3p; 21-5p; 9-3p                                                                  |
| 44        | T cell receptor signaling pathway       | 0.03574          | 4         | 19a-3p; 15a-5p; 9-3p; 15b-5p                                                         |
| 45        | Focal adhesion                          | 0.049707         | 6         | 19a-3p; 16-5p; 148a-3p; 15a-5p; 221-3p; 15b-5p                                       |
| 46        | Hepatitis C                             | 0.049707         | 4         | 19a-3p; 148a-3p; 221-3p; 9-3p                                                        |
| 47        | Toll-like receptor signaling pathway    | 0.049707         | 3         | 19a-3p; 21-5p; 9-3p                                                                  |

\*p-value after the Benjamini-Hochberg adjustment
