# Supplementary material for: A Set of 17 microRNAs Common for Brain and Cerebrospinal Fluid Differentiates Primary Central Nervous System Lymphoma from Non-Malignant Brain Tumors
Source: MDPI journal article supplement (doi:10.3390/biom11091395), 2021-09-21
Supplement: s1 [file s1]

Supplementary Table S5

CNS DLBCL-specific CSF microRNAs and biological processes; bold indicates processes linked to metabolism.

| <b>GO Biological process (miRPathDB)</b> |                                                           |                    |                                |                                                                                                                                                 |
|------------------------------------------|-----------------------------------------------------------|--------------------|--------------------------------|-------------------------------------------------------------------------------------------------------------------------------------------------|
| <b>No</b>                                | <b>subcategory</b>                                        | <b>q-value*</b>    | <b>number of miRs observed</b> | <b>hsa-miRs</b>                                                                                                                                 |
| <b>1</b>                                 | <b>positive regulation of cellular metabolic process</b>  | <b>1.05817E-09</b> | <b>18</b>                      | <b>19a-3p; 16-5p; 148a-3p; 15a-5p; 19b-3p; 221-3p; 423-5p; 21-5p; 9-3p; 15b-5p; 17-3p; 210-3p; 92a-3p; 106b-3p; 25-3p; 9-5p; 20a-5p; 26a-5p</b> |
| 2                                        | organelle organization                                    | 1.95906E-09        | 15                             | 19a-3p; 16-5p; 148a-3p; 15a-5p; 19b-3p; 221-3p; 423-5p; 21-5p; 15b-5p; 92a-3p; 106b-3p; 25-3p; 9-5p; 20a-5p; 26a-5p                             |
| 3                                        | positive regulation of cellular biosynthetic process      | 1.95906E-09        | 17                             | 19a-3p; 16-5p; 148a-3p; 15a-5p; 19b-3p; 221-3p; 423-5p; 21-5p; 9-3p; 15b-5p; 17-3p; 210-3p; 92a-3p; 25-3p; 9-5p; 20a-5p; 26a-5p                 |
| 4                                        | regulation of organelle organization                      | 5.45239E-09        | 14                             | 19a-3p; 16-5p; 148a-3p; 15a-5p; 221-3p; 21-5p; 9-3p; 15b-5p; 210-3p; 92a-3p; 25-3p; 9-5p; 20a-5p; 26a-5p                                        |
| <b>5</b>                                 | <b>protein metabolic process</b>                          | <b>6.92324E-09</b> | <b>15</b>                      | <b>19a-3p; 16-5p; 148a-3p; 15a-5p; 19b-3p; 221-3p; 423-5p; 21-5p; 15b-5p; 17-3p; 92a-3p; 106b-3p; 25-3p; 20a-5p; 26a-5p</b>                     |
| <b>6</b>                                 | <b>nitrogen compound metabolic process</b>                | <b>1.0157E-08</b>  | <b>17</b>                      | <b>19a-3p; 16-5p; 148a-3p; 15a-5p; 19b-3p; 221-3p; 423-5p; 21-5p; 15b-5p; 17-3p; 210-3p; 92a-3p; 106b-3p; 25-3p; 9-5p; 20a-5p; 26a-5p</b>       |
| 7                                        | cellular protein modification process                     | 1.36762E-08        | 15                             | 19a-3p; 16-5p; 148a-3p; 15a-5p; 19b-3p; 221-3p; 21-5p; 9-3p; 15b-5p; 17-3p; 210-3p; 92a-3p; 9-5p; 20a-5p; 26a-5p                                |
| 8                                        | protein modification process                              | 1.36762E-08        | 15                             | 19a-3p; 16-5p; 148a-3p; 15a-5p; 19b-3p; 221-3p; 21-5p; 9-3p; 15b-5p; 17-3p; 210-3p; 92a-3p; 9-5p; 20a-5p; 26a-5p                                |
| <b>9</b>                                 | <b>catabolic process</b>                                  | <b>2.50187E-08</b> | <b>12</b>                      | <b>19a-3p; 16-5p; 148a-3p; 15a-5p; 221-3p; 423-5p; 21-5p; 15b-5p; 17-3p; 92a-3p; 20a-5p; 26a-5p</b>                                             |
| 10                                       | cytoskeleton-dependent intracellular transport            | 2.50187E-08        | 7                              | 16-5p; 15a-5p; 19b-3p; 15b-5p; 92a-3p; 9-5p; 26a-5p                                                                                             |
| <b>11</b>                                | <b>macromolecule metabolic process</b>                    | <b>2.50187E-08</b> | <b>17</b>                      | <b>19a-3p; 16-5p; 148a-3p; 15a-5p; 19b-3p; 221-3p; 423-5p; 21-5p; 15b-5p; 17-3p; 210-3p; 92a-3p; 106b-3p; 25-3p; 9-5p; 20a-5p; 26a-5p</b>       |
| 12                                       | positive regulation of macromolecule biosynthetic process | 2.50187E-08        | 16                             | 19a-3p; 16-5p; 148a-3p; 15a-5p; 19b-3p; 221-3p; 423-5p; 21-5p; 9-3p; 15b-5p; 17-3p; 92a-3p; 25-3p; 9-5p; 20a-5p; 26a-5p                         |
| <b>13</b>                                | <b>positive regulation of metabolic process</b>           | <b>2.50187E-08</b> | <b>17</b>                      | <b>19a-3p; 16-5p; 148a-3p; 15a-5p; 19b-3p; 221-3p; 423-5p; 21-5p; 9-3p; 15b-5p; 17-3p; 210-3p; 92a-3p; 106b-3p; 9-5p; 20a-5p; 26a-5p</b>        |
| 14                                       | regulation of cell death                                  | 2.50187E-08        | 14                             | 19a-3p; 16-5p; 148a-3p; 15a-5p; 19b-3p; 221-3p; 423-5p; 21-5p; 9-3p; 15b-5p; 210-3p; 92a-3p; 9-5p; 26a-5p                                       |
| <b>15</b>                                | <b>nuclear-transcribed mRNA catabolic process</b>         | <b>4.50392E-08</b> | <b>10</b>                      | <b>16-5p; 148a-3p; 221-3p; 423-5p; 15b-5p; 17-3p; 92a-3p; 106b-3p; 25-3p; 26a-5p</b>                                                            |
| 16                                       | regulation of programmed cell death                       | 6.16964E-08        | 14                             | 19a-3p; 16-5p; 148a-3p; 15a-5p; 221-3p; 423-5p; 21-5p; 9-3p; 15b-5p; 210-3p; 92a-3p; 9-5p; 20a-5p; 26a-5p                                       |

|    |                                                             |                    |           |                                                                                                                                                 |
|----|-------------------------------------------------------------|--------------------|-----------|-------------------------------------------------------------------------------------------------------------------------------------------------|
| 17 | cell death                                                  | 7.2243E-08         | 14        | 19a-3p; 16-5p; 148a-3p; 15a-5p; 19b-3p; 221-3p; 21-5p; 9-3p; 15b-5p; 210-3p; 92a-3p; 9-5p; 20a-5p; 26a-5p                                       |
| 18 | miRNA loading onto RISC involved in gene silencing by miRNA | 8.69552E-08        | 9         | 19a-3p; 16-5p; 148a-3p; 15a-5p; 19b-3p; 221-3p; 21-5p; 15b-5p; 20a-5p                                                                           |
| 19 | immune system process                                       | 8.7533E-08         | 12        | 19a-3p; 16-5p; 148a-3p; 15a-5p; 221-3p; 21-5p; 9-3p; 15b-5p; 92a-3p; 25-3p; 9-5p; 20a-5p                                                        |
| 20 | apoptotic process                                           | 9.33689E-08        | 14        | 19a-3p; 16-5p; 148a-3p; 15a-5p; 19b-3p; 221-3p; 21-5p; 9-3p; 15b-5p; 210-3p; 92a-3p; 9-5p; 20a-5p; 26a-5p                                       |
| 21 | <b>regulation of protein metabolic process</b>              | <b>9.33689E-08</b> | <b>15</b> | <b>19a-3p; 16-5p; 148a-3p; 15a-5p; 19b-3p; 221-3p; 423-5p; 21-5p; 9-3p; 15b-5p; 17-3p; 92a-3p; 25-3p; 9-5p; 26a-5p</b>                          |
| 22 | <b>cellular metabolic process</b>                           | <b>9.3441E-08</b>  | <b>16</b> | <b>19a-3p; 148a-3p; 15a-5p; 19b-3p; 221-3p; 21-5p; 9-3p; 15b-5p; 17-3p; 210-3p; 92a-3p; 106b-3p; 25-3p; 9-5p; 20a-5p; 26a-5p</b>                |
| 23 | <b>cellular protein metabolic process</b>                   | <b>9.3441E-08</b>  | <b>14</b> | <b>19a-3p; 16-5p; 148a-3p; 15a-5p; 19b-3p; 221-3p; 423-5p; 21-5p; 15b-5p; 17-3p; 92a-3p; 25-3p; 20a-5p; 26a-5p</b>                              |
| 24 | membrane organization                                       | 9.3441E-08         | 10        | 19a-3p; 16-5p; 148a-3p; 15a-5p; 221-3p; 423-5p; 15b-5p; 92a-3p; 9-5p; 20a-5p                                                                    |
| 25 | negative regulation of transcription DNA-templated          | 9.3441E-08         | 16        | 19a-3p; 16-5p; 148a-3p; 15a-5p; 19b-3p; 221-3p; 423-5p; 21-5p; 9-3p; 15b-5p; 210-3p; 92a-3p; 25-3p; 9-5p; 20a-5p; 26a-5p                        |
| 26 | positive regulation of gene expression                      | 9.3441E-08         | 16        | 19a-3p; 16-5p; 148a-3p; 15a-5p; 19b-3p; 221-3p; 423-5p; 21-5p; 9-3p; 15b-5p; 17-3p; 92a-3p; 25-3p; 9-5p; 20a-5p; 26a-5p                         |
| 27 | programmed cell death                                       | 9.3441E-08         | 14        | 19a-3p; 16-5p; 148a-3p; 15a-5p; 19b-3p; 221-3p; 21-5p; 9-3p; 15b-5p; 210-3p; 92a-3p; 9-5p; 20a-5p; 26a-5p                                       |
| 28 | <b>regulation of metabolic process</b>                      | <b>9.3441E-08</b>  | <b>18</b> | <b>19a-3p; 16-5p; 148a-3p; 15a-5p; 19b-3p; 221-3p; 423-5p; 21-5p; 9-3p; 15b-5p; 17-3p; 210-3p; 92a-3p; 106b-3p; 25-3p; 9-5p; 20a-5p; 26a-5p</b> |
| 29 | posttranscriptional regulation of gene expression           | 9.59062E-08        | 13        | 19a-3p; 16-5p; 148a-3p; 15a-5p; 19b-3p; 221-3p; 21-5p; 15b-5p; 17-3p; 92a-3p; 25-3p; 20a-5p; 26a-5p                                             |
| 30 | regulation of gene expression                               | 9.59062E-08        | 18        | 19a-3p; 16-5p; 148a-3p; 15a-5p; 19b-3p; 221-3p; 423-5p; 21-5p; 9-3p; 15b-5p; 17-3p; 210-3p; 92a-3p; 106b-3p; 25-3p; 9-5p; 20a-5p; 26a-5p        |
| 31 | regulation of gene expression epigenetic                    | 9.59062E-08        | 12        | 19a-3p; 16-5p; 148a-3p; 15a-5p; 19b-3p; 221-3p; 21-5p; 15b-5p; 92a-3p; 9-5p; 20a-5p; 26a-5p                                                     |

\*p-value after the Benjamini-Hochberg adjustment
