# Supplementary material for: A Set of 17 microRNAs Common for Brain and Cerebrospinal Fluid Differentiates Primary Central Nervous System Lymphoma from Non-Malignant Brain Tumors
Source: MDPI journal article supplement (doi:10.3390/biom11091395), 2021-09-21
Supplement: s1 [file s1]

## Supplementary Table S4

Newly identified miRNAs (miRBase v.22)

| miRNA locus                    | CSF                 |              | tumor                |           | Sequence                | Precursor                                                                           |
|--------------------------------|---------------------|--------------|----------------------|-----------|-------------------------|-------------------------------------------------------------------------------------|
|                                | CNS<br>DLBCL<br>n/9 | n-ML<br>n/12 | CNS<br>DLBCL<br>n/10 | n-ML n/10 |                         |                                                                                     |
| chr5:174790685..174790764:-    | 1                   | 1            | 10                   | 9         | auccugccgacuaugcca      | auccugccgacuaugccaauugucaggucccaaccugggcu<br>ggguuccgaggggaguugguagauggguggcagguagu |
| chr6:56187641..56187683:+      | 1                   | 1            | 9                    | 10        | aaccauccucugcuauca      | auaaccagaggucgauggaucaaaaaccauccucugcuauc<br>a                                      |
| chr7:2516409..2516482:-        | 0                   | 2            | 0                    | 0         | gguucgagucccuggaggg     | gguucgagucccuggagggggcccgugaucccgaggaaga<br>gccgggccaggguccugccuagaccuugccgu        |
| chr12:95841363..95841423:<br>+ | 0                   | 0            | 7                    | 8         | uccucacacggggcacca      | ggcuccaacuguggggggucuguuuccgcagaccgcugacu<br>uuccucacacggggcacca                    |
| chr17:65822071..65822137:<br>- | 2                   | 0            | 10                   | 10        | ggggccggcgggcgggcg<br>g | gccccgcuccucgcccccccgccggggcgugugcu<br>ggggggggccggcgggcgggcg                       |

CNS DLBCL, central nervous system primary diffuse large B-cell lymphoma; n-ML, non-malignant brain lesions; CSF, cerebrospinal fluid; n, number of samples where the presence of the miRNA molecules was identified
