# Supplementary material for: A Set of 17 microRNAs Common for Brain and Cerebrospinal Fluid Differentiates Primary Central Nervous System Lymphoma from Non-Malignant Brain Tumors
Source: MDPI journal article supplement (doi:10.3390/biom11091395), 2021-09-21
Supplement: s1 [file s1]

## Supplementary Table S2

Databases used for the microRNA enrichment analysis and by the annotation tool (miEAA)

| Database                | Description categories                         |
|-------------------------|------------------------------------------------|
| Gene Ontology           | Annotations derived over miRTarBase (indirect) |
| Gene Ontology           | Annotations                                    |
| KEGG                    | Pathways                                       |
| miRandola               | exRNA forms                                    |
| miRBase                 | Chromosomal location                           |
| miRBase                 | Conservation                                   |
| miRBase                 | Confidence                                     |
| miRBase                 | Seed family                                    |
| miRPathDB               | GO Biological process                          |
| miRPathDB               | GO Cellular component                          |
| miRPathDB               | GO Molecular function                          |
| iRPathDB                | KEGG                                           |
| miRPathDB               | Reactome                                       |
| miRPathDB               | WikiPathways                                   |
| miRTarBase              | Target genes                                   |
| miRWalk                 | Diseases                                       |
| miRWalk                 | Gene Ontology                                  |
| miRWalk                 | Organs                                         |
| miRWalk                 | Pathways                                       |
| MNDR                    | Diseases                                       |
| NPInter                 | Interactions                                   |
| Published age/gender    | Gender/Age                                     |
| Published cell specific | Cell-type specific                             |
| Published diseases      | Published Diseases                             |
| Published Immune Cells  | Immune cells                                   |
| RNAlocate               | Localization                                   |
| SM2miR                  | Drugs                                          |
| TissueAtlas             | Expressed in tissue                            |
