# Supplementary material for: A Set of 17 microRNAs Common for Brain and Cerebrospinal Fluid Differentiates Primary Central Nervous System Lymphoma from Non-Malignant Brain Tumors
Source: MDPI journal article supplement (doi:10.3390/biom11091395), 2021-09-21
Supplement: s1 [file s1]

## Supplementary Table S8

## Sources of CNS DLBCL-specific CSF microRNAs.

| <b>GO Cellular component (miRPathDB)</b> |                                   |                 |                                |                                                                                                     |
|------------------------------------------|-----------------------------------|-----------------|--------------------------------|-----------------------------------------------------------------------------------------------------|
| <b>No</b>                                | <b>subcategory</b>                | <b>q-value*</b> | <b>number of miRs observed</b> | <b>hsa-miRs</b>                                                                                     |
| 1                                        | vesicle                           | 2.702E-07       | 10                             | 19a-3p; 16-5p; 148a-3p; 15a-5p; 19b-3p; 423-5p; 15b-5p; 17-3p; 92a-3p; 9-5p                         |
| 2                                        | cytoplasm                         | 8.538E-07       | 13                             | 19a-3p; 148a-3p; 15a-5p; 19b-3p; 221-3p; 423-5p; 21-5p; 15b-5p; 17-3p; 92a-3p; 9-5p; 20a-5p; 26a-5p |
| 3                                        | nuclear body                      | 3.948E-06       | 10                             | 19a-3p; 16-5p; 15a-5p; 19b-3p; 221-3p; 21-5p; 15b-5p; 17-3p; 92a-3p; 26a-5p                         |
| 4                                        | protein-containing complex        | 5.438E-06       | 13                             | 16-5p; 148a-3p; 15a-5p; 19b-3p; 221-3p; 423-5p; 21-5p; 15b-5p; 17-3p; 92a-3p; 25-3p; 20a-5p; 26a-5p |
| 5                                        | RISC-loading complex              | 1.637E-05       | 7                              | 19a-3p; 16-5p; 148a-3p; 15a-5p; 19b-3p; 21-5p; 15b-5p                                               |
| 6                                        | cytoplasmic vesicle               | 1.637E-05       | 8                              | 19a-3p; 16-5p; 148a-3p; 15a-5p; 19b-3p; 423-5p; 15b-5p; 9-5p                                        |
| 7                                        | cytosol                           | 1.637E-05       | 12                             | 19a-3p; 16-5p; 148a-3p; 15a-5p; 19b-3p; 221-3p; 21-5p; 15b-5p; 17-3p; 92a-3p; 20a-5p; 26a-5p        |
| 8                                        | endomembrane system               | 1.637E-05       | 7                              | 19a-3p; 16-5p; 148a-3p; 19b-3p; 15b-5p; 92a-3p; 9-5p                                                |
| 9                                        | intracellular vesicle             | 1.637E-05       | 8                              | 19a-3p; 16-5p; 148a-3p; 15a-5p; 19b-3p; 423-5p; 15b-5p; 9-5p                                        |
| 10                                       | organelle membrane                | 1.637E-05       | 7                              | 19a-3p; 16-5p; 148a-3p; 15a-5p; 19b-3p; 15b-5p; 92a-3p                                              |
| 11                                       | phagophore assembly site          | 1.637E-05       | 5                              | 19a-3p; 16-5p; 19b-3p; 423-5p; 20a-5p                                                               |
| 12                                       | microtubule cytoskeleton          | 3.566E-05       | 7                              | 16-5p; 148a-3p; 15a-5p; 19b-3p; 15b-5p; 92a-3p; 26a-5p                                              |
| 13                                       | transferase complex               | 9.786E-05       | 8                              | 19a-3p; 16-5p; 15a-5p; 19b-3p; 21-5p; 15b-5p; 92a-3p; 26a-5p                                        |
| 14                                       | micro-ribonucleoprotein complex   | 0.0001407       | 7                              | 19a-3p; 148a-3p; 15a-5p; 19b-3p; 21-5p; 15b-5p; 20a-5p                                              |
| 15                                       | transcriptional repressor complex | 0.0001407       | 7                              | 19a-3p; 16-5p; 15a-5p; 19b-3p; 15b-5p; 92a-3p; 9-5p                                                 |
| 16                                       | catalytic complex                 | 0.0001419       | 9                              | 19a-3p; 16-5p; 15a-5p; 19b-3p; 221-3p; 21-5p; 15b-5p; 92a-3p; 26a-5p                                |
| <b>Organs (miRWalk)</b>                  |                                   |                 |                                |                                                                                                     |
| <b>No</b>                                | <b>subcategory</b>                | <b>q-value</b>  | <b>number of miRs observed</b> | <b>hsa-miRs</b>                                                                                     |
| 1                                        | lymphocytes                       | 0.0007133       | 9                              | 16-5p; 148a-3p; 15a-5p; 19b-3p; 221-3p; 15b-5p; 92a-3p; 20a-5p; 26a-5p                              |
| 2                                        | blood cells                       | 0.0044112       | 4                              | 148a-3p; 19b-3p; 92a-3p; 20a-5p                                                                     |
| 3                                        | bodily secretions                 | 0.0044112       | 8                              | 19a-3p; 16-5p; 15a-5p; 19b-3p; 21-5p; 9-5p; 20a-5p; 26a-5p                                          |
| 4                                        | bone and bones                    | 0.0044112       | 10                             | 19a-3p; 16-5p; 148a-3p; 19b-3p; 21-5p; 92a-3p; 25-3p; 9-5p; 20a-5p; 26a-5p                          |
| 5                                        | granulocytes                      | 0.014233        | 4                              | 148a-3p; 19b-3p; 92a-3p; 20a-5p                                                                     |
| 6                                        | PC12 cells                        | 0.014233        | 3                              | 16-5p; 15a-5p; 221-3p                                                                               |
| 7                                        | T-lymphocytes                     | 0.014233        | 7                              | 148a-3p; 19b-3p; 221-3p; 21-5p; 92a-3p; 20a-5p; 26a-5p                                              |
| 8                                        | immune system                     | 0.0211429       | 4                              | 148a-3p; 19b-3p; 92a-3p; 20a-5p                                                                     |
| 9                                        | plasma cells                      | 0.0211429       | 4                              | 19a-3p; 19b-3p; 92a-3p; 25-3p                                                                       |
| 10                                       | umbilical cord                    | 0.0211429       | 4                              | 148a-3p; 19b-3p; 92a-3p; 20a-5p                                                                     |
| 11                                       | blood                             | 0.0230447       | 8                              | 16-5p; 148a-3p; 15a-5p; 19b-3p; 221-3p; 92a-3p; 9-5p; 20a-5p                                        |
| 12                                       | blood vessels                     | 0.0230447       | 3                              | 16-5p; 221-3p; 92a-3p                                                                               |

|    |                           |           |   |                                                                   |
|----|---------------------------|-----------|---|-------------------------------------------------------------------|
| 13 | endothelial cells         | 0.0230447 | 7 | 19a-3p; 16-5p; 221-3p; 21-5p; 210-3p; 92a-3p; 20a-5p              |
| 14 | erythroid precursor cells | 0.0230447 | 2 | 16-5p; 15a-5p                                                     |
| 15 | joints                    | 0.0230447 | 2 | 19a-3p; 19b-3p                                                    |
| 16 | killer cells natural      | 0.0230447 | 3 | 16-5p; 15a-5p; 15b-5p                                             |
| 17 | muscle smooth             | 0.0230447 | 4 | 221-3p; 21-5p; 25-3p; 26a-5p                                      |
| 18 | myocytes smooth muscle    | 0.0230447 | 4 | 221-3p; 21-5p; 25-3p; 26a-5p                                      |
| 19 | stomach                   | 0.0230447 | 3 | 21-5p; 20a-5p; 26a-5p                                             |
| 20 | X Chromosome              | 0.0230447 | 3 | 19b-3p; 221-3p; 92a-3p                                            |
| 21 | brain                     | 0.0261338 | 9 | 15a-5p; 19b-3p; 221-3p; 21-5p; 9-3p; 15b-5p; 9-5p; 20a-5p; 26a-5p |
| 22 | hematopoietic stem cells  | 0.0391702 | 4 | 148a-3p; 19b-3p; 92a-3p; 20a-5p                                   |
| 23 | hand                      | 0.0491233 | 4 | 16-5p; 15a-5p; 21-5p; 20a-5p                                      |

\*p-value after the Benjamini-Hochberg adjustment
