# Supplementary material for: A Set of 17 microRNAs Common for Brain and Cerebrospinal Fluid Differentiates Primary Central Nervous System Lymphoma from Non-Malignant Brain Tumors
Source: MDPI journal article supplement (doi:10.3390/biom11091395), 2021-09-21
Supplement: s1 [file s1]

## Supplementary Table S12

## CNS DLBCL-specific tumor microRNAs and biological processes.

| <b>MiRPathDB GO Biological process</b> |                                                   |                 |                                |                                                                                                                                                                                                                                                                                                                                                                                                                                                                                                                                                                                                                                                                                                                                                                                   |
|----------------------------------------|---------------------------------------------------|-----------------|--------------------------------|-----------------------------------------------------------------------------------------------------------------------------------------------------------------------------------------------------------------------------------------------------------------------------------------------------------------------------------------------------------------------------------------------------------------------------------------------------------------------------------------------------------------------------------------------------------------------------------------------------------------------------------------------------------------------------------------------------------------------------------------------------------------------------------|
| <b>No</b>                              | <b>subcategory</b>                                | <b>q-value*</b> | <b>number of miRs observed</b> | <b>hsa-miRs</b>                                                                                                                                                                                                                                                                                                                                                                                                                                                                                                                                                                                                                                                                                                                                                                   |
| 1                                      | cellular protein modification process             | 8.223E-22       | 71                             | 92a-3p; 17-5p; 182-5p; 20a-5p; 155-5p; 96-5p; 18a-5p; 19a-3p; hsa-let-7c-5p; 17-3p; 183-5p; 142-3p; 744-5p; 93-5p; 200c-3p; 19b-3p; 582-5p; 497-5p; 146a-5p; 181c-5p; 106b-5p; 15b-5p; 130b-3p; 210-3p; 9-5p; 16-5p; 192-5p; 30d-5p; 124-3p; 30a-5p; 486-3p; 186-5p; 9-3p; 31-5p; 451a; 191-5p; 125a-5p; 195-5p; 203a-3p; 128-3p; hsa-let-7a-5p; 218-5p; 135a-5p; 543; 487b-3p; 148a-3p; 30c-5p; 30b-5p; 132-3p; 130a-3p; 98-5p; 625-5p; 15a-5p; 376a-5p; 26a-5p; 323a-3p; 7-5p; 138-5p; 27b-3p; 27a-3p; 494-3p; 32-5p; 21-5p; 20b-5p; 340-5p; 153-3p; 454-3p; 145-5p; 125b-5p; 126-3p; 92b-3p                                                                                                                                                                                    |
| 2                                      | protein modification process                      | 8.223E-22       | 71                             | 92a-3p; 17-5p; 182-5p; 20a-5p; 155-5p; 96-5p; 18a-5p; 19a-3p; hsa-let-7c-5p; 17-3p; 183-5p; 142-3p; 744-5p; 93-5p; 200c-3p; 19b-3p; 582-5p; 497-5p; 146a-5p; 181c-5p; 106b-5p; 15b-5p; 130b-3p; 210-3p; 9-5p; 16-5p; 192-5p; 30d-5p; 124-3p; 30a-5p; 486-3p; 186-5p; 9-3p; 31-5p; 451a; 191-5p; 125a-5p; 195-5p; 203a-3p; 128-3p; hsa-let-7a-5p; 218-5p; 135a-5p; 543; 487b-3p; 148a-3p; 30c-5p; 30b-5p; 132-3p; 130a-3p; 98-5p; 625-5p; 15a-5p; 376a-5p; 26a-5p; 323a-3p; 7-5p; 138-5p; 27b-3p; 27a-3p; 494-3p; 32-5p; 21-5p; 20b-5p; 340-5p; 153-3p; 454-3p; 145-5p; 125b-5p; 126-3p; 92b-3p                                                                                                                                                                                    |
| 3                                      | immune system process                             | 1.814E-21       | 53                             | 92a-3p; 17-5p; 20a-5p; 155-5p; 96-5p; 18a-5p; 19a-3p; 93-5p; 200c-3p; 582-5p; 497-5p; 146a-5p; 106b-5p; 15b-5p; 130b-3p; 25-3p; 9-5p; 16-5p; 30d-5p; 376c-3p; 124-3p; 30a-5p; 9-3p; 31-5p; 451a; 125a-5p; 195-5p; 128-3p; 218-5p; 135a-5p; 543; 148a-3p; 30c-5p; 30b-5p; 130a-3p; 15a-5p; 106a-5p; 139-5p; 320c; 1-3p; 33b-5p; 378a-3p; 138-5p; 27b-3p; 204-5p; 27a-3p; 494-3p; 21-5p; 23b-3p; 145-5p; 125b-5p; 126-3p; 1296-5p                                                                                                                                                                                                                                                                                                                                                   |
| 4                                      | positive regulation of metabolic process          | 1.814E-21       | 93                             | 92a-3p; 106b-3p; 17-5p; 182-5p; 20a-5p; 155-5p; 96-5p; 18a-5p; 1246; 19a-3p; hsa-let-7c-5p; 17-3p; 183-5p; 142-3p; 92a-1-5p; 744-5p; 93-5p; 200c-3p; 19b-3p; 497-5p; 146a-5p; 181c-5p; 106b-5p; 15b-5p; 130b-3p; 210-3p; 9-5p; 16-5p; 192-5p; 30d-5p; 381-3p; 376c-3p; 124-3p; 30a-5p; 410-3p; 486-3p; 186-5p; 9-3p; 31-5p; 625-3p; 451a; 505-3p; 491-5p; 125a-5p; 195-5p; 203a-3p; 128-3p; 143-3p; hsa-let-7a-5p; 218-5p; 135a-5p; 423-5p; 543; 148a-3p; 656-3p; 30c-5p; 30b-5p; 99a-5p; 144-3p; 101-5p; 484; 130a-3p; 134-5p; 935; 98-5p; 149-5p; 495-3p; 15a-5p; 26a-5p; 106a-5p; 139-5p; 323a-3p; 423-3p; 425-3p; 320c; 1-3p; 378a-3p; 138-5p; 187-3p; 27b-3p; 204-5p; 27a-3p; 494-3p; 369-3p; hsa-let-7b-5p; 21-5p; 20b-5p; 30a-3p; 153-3p; 145-5p; 125b-5p; 126-3p; 1296-5p |
| 5                                      | positive regulation of cellular metabolic process | 3.511E-21       | 88                             | 92a-3p; 106b-3p; 17-5p; 182-5p; 20a-5p; 155-5p; 96-5p; 18a-5p; 1246; 19a-3p; hsa-let-7c-5p; 17-3p; 183-5p; 142-3p; 92a-1-5p; 744-5p; 93-5p; 200c-3p; 19b-3p; 497-5p; 146a-5p; 106b-5p; 15b-5p; 130b-3p; 25-3p; 210-3p; 9-5p; 16-5p; 192-5p; 30d-5p; 381-3p; 376c-3p; 124-3p; 30a-5p; 410-3p; 486-3p; 186-5p; 9-3p; 31-5p; 451a; 505-3p; 491-5p; 125a-5p; 195-5p; 203a-3p; 128-3p; 143-3p; hsa-let-7a-5p; 218-5p; 135a-5p; 423-5p; 543; 148a-3p; 656-3p; 30c-5p; 30b-5p; 99a-5p; 144-3p; 101-5p; 130a-3p; 134-5p; 98-5p; 149-5p; 625-5p; 495-3p; 15a-5p; 26a-5p; 106a-5p; 139-5p; 323a-3p; 425-3p; 320c; 378a-3p; 138-5p; 187-3p; 27b-3p; 204-5p; 27a-3p; 494-3p; hsa-let-7b-5p; 21-5p; 20b-5p; 30a-3p; 153-3p; 145-5p; 125b-5p; 126-3p; 1296-5p                                   |

|    |                                         |           |    |                                                                                                                                                                                                                                                                                                                                                                                                                                                                                                                                                                                                                                                      |
|----|-----------------------------------------|-----------|----|------------------------------------------------------------------------------------------------------------------------------------------------------------------------------------------------------------------------------------------------------------------------------------------------------------------------------------------------------------------------------------------------------------------------------------------------------------------------------------------------------------------------------------------------------------------------------------------------------------------------------------------------------|
| 6  | protein metabolic process               | 3.511E-21 | 67 | 92a-3p; 106b-3p; 17-5p; 182-5p; 20a-5p; 155-5p; 96-5p; 18a-5p; 19a-3p; hsa-let-7c-5p; 17-3p; 183-5p; 142-3p; 744-5p; 93-5p; 200c-3p; 19b-3p; 497-5p; 146a-5p; 181c-5p; 15b-5p; 130b-3p; 25-3p; 16-5p; 30d-5p; 124-3p; 30a-5p; 486-3p; 186-5p; 31-5p; 625-3p; 451a; 191-5p; 125a-5p; 195-5p; 203a-3p; 128-3p; hsa-let-7a-5p; 218-5p; 423-5p; 543; 487b-3p; 148a-3p; 30c-5p; 30b-5p; 99a-5p; 132-3p; 484; 130a-3p; 149-5p; 625-5p; 15a-5p; 26a-5p; 423-3p; 590-5p; 7-5p; 138-5p; 27b-3p; 27a-3p; 494-3p; 32-5p; hsa-let-7b-5p; 21-5p; 145-5p; 125b-5p; 126-3p; 92b-3p                                                                                  |
| 7  | regulation of protein metabolic process | 7.597E-21 | 77 | 92a-3p; 17-5p; 182-5p; 155-5p; 96-5p; 18a-5p; 19a-3p; hsa-let-7c-5p; 17-3p; 183-5p; 142-3p; 92a-1-5p; 744-5p; 93-5p; 200c-3p; 19b-3p; 582-5p; 497-5p; 146a-5p; 181c-5p; 106b-5p; 15b-5p; 130b-3p; 25-3p; 9-5p; 16-5p; 30d-5p; 376c-3p; 124-3p; 30a-5p; 486-3p; 186-5p; 9-3p; 31-5p; 625-3p; 451a; 191-5p; 125a-5p; 195-5p; 203a-3p; 128-3p; hsa-let-7a-5p; 218-5p; 423-5p; 487b-3p; 148a-3p; 30c-5p; 144-3p; 101-5p; 132-3p; 484; 130a-3p; 149-5p; 625-5p; 495-3p; 15a-5p; 194-5p; 26a-5p; 106a-5p; 423-3p; 320c; 1-3p; 378a-3p; 590-5p; 7-5p; 138-5p; 27b-3p; 204-5p; 27a-3p; 494-3p; hsa-let-7b-5p; 21-5p; 30a-3p; 145-5p; 125b-5p; 126-3p; 92b-3p |
| 8  | response to organic substance           | 7.597E-21 | 72 | 92a-3p; 17-5p; 182-5p; 20a-5p; 155-5p; 96-5p; 18a-5p; 19a-3p; hsa-let-7c-5p; 17-3p; 183-5p; 142-3p; 744-5p; 93-5p; 200c-3p; 582-5p; 497-5p; 146a-5p; 106b-5p; 15b-5p; 130b-3p; 25-3p; 9-5p; 16-5p; 381-3p; 124-3p; 30a-5p; 186-5p; 9-3p; 451a; 191-5p; 125a-5p; 195-5p; 203a-3p; 369-5p; 128-3p; 143-3p; 218-5p; 135a-5p; 148a-3p; 30c-5p; 30b-5p; 144-3p; 31-3p; 132-3p; 484; 130a-3p; 98-5p; 15a-5p; 194-5p; 26a-5p; 296-5p; 106a-5p; 423-3p; 320c; 1-3p; 33b-5p; 378a-3p; 138-5p; 27b-3p; 204-5p; 27a-3p; 494-3p; 32-5p; 21-5p; 30a-3p; 153-3p; 23b-3p; 145-5p; 125b-5p; 126-3p; 92b-3p                                                           |
| 9  | response to growth factor               | 2.348E-20 | 60 | 92a-3p; 17-5p; 182-5p; 155-5p; 96-5p; 18a-5p; 19a-3p; hsa-let-7c-5p; 183-5p; 744-5p; 200c-3p; 19b-3p; 497-5p; 146a-5p; 181c-5p; 15b-5p; 130b-3p; 25-3p; 9-5p; 16-5p; 376c-3p; 124-3p; 30a-5p; 186-5p; 625-3p; 451a; 125a-5p; 195-5p; 203a-3p; 128-3p; 218-5p; 135a-5p; 487b-3p; 148a-3p; 144-3p; 31-3p; 132-3p; 130a-3p; 495-3p; 15a-5p; 194-5p; 26a-5p; 296-5p; 106a-5p; 1-3p; 33b-5p; 378a-3p; 590-5p; 138-5p; 27b-3p; 204-5p; 27a-3p; 494-3p; 32-5p; 21-5p; 30a-3p; 23b-3p; 145-5p; 125b-5p; 126-3p                                                                                                                                               |
| 10 | cellular protein metabolic process      | 4.534E-20 | 68 | 92a-3p; 17-5p; 182-5p; 20a-5p; 155-5p; 96-5p; 18a-5p; 19a-3p; hsa-let-7c-5p; 17-3p; 183-5p; 142-3p; 744-5p; 93-5p; 200c-3p; 19b-3p; 497-5p; 146a-5p; 181c-5p; 106b-5p; 15b-5p; 130b-3p; 25-3p; 16-5p; 30d-5p; 124-3p; 30a-5p; 486-3p; 186-5p; 31-5p; 625-3p; 451a; 191-5p; 125a-5p; 195-5p; 203a-3p; 128-3p; hsa-let-7a-5p; 218-5p; 423-5p; 543; 487b-3p; 148a-3p; 30c-5p; 30b-5p; 99a-5p; 101-5p; 132-3p; 484; 130a-3p; 98-5p; 149-5p; 625-5p; 15a-5p; 26a-5p; 423-3p; 7-5p; 138-5p; 27b-3p; 27a-3p; 494-3p; 32-5p; hsa-let-7b-5p; 21-5p; 145-5p; 125b-5p; 126-3p; 92b-3p                                                                           |
| 11 | negative regulation of cell death       | 4.534E-20 | 59 | 17-5p; 182-5p; 155-5p; 96-5p; hsa-let-7c-5p; 183-5p; 92a-1-5p; 744-5p; 200c-3p; 497-5p; 146a-5p; 181c-5p; 15b-5p; 9-5p; 16-5p; 376c-3p; 124-3p; 410-3p; 31-5p; 625-3p; 451a; 191-5p; 491-5p; 125a-5p; 195-5p; 203a-3p; 128-3p; 143-3p; hsa-let-7a-5p; 218-5p; 135a-5p; 543; 487b-3p; 148a-3p; 144-3p; 98-5p; 149-5p; 495-3p; 15a-5p; 26a-5p; 106a-5p; 139-5p; 425-3p; 1-3p; 33b-5p; 138-5p; 127-3p; 27b-3p; 204-5p; 27a-3p; 494-3p; 21-5p; 30a-3p; 153-3p; 23b-3p; 145-5p; 125b-5p; 126-3p; 92b-3p                                                                                                                                                   |

|    |                                                      |           |    |                                                                                                                                                                                                                                                                                                                                                                                                                                                                                                                                                                                                                                                                                                                      |
|----|------------------------------------------------------|-----------|----|----------------------------------------------------------------------------------------------------------------------------------------------------------------------------------------------------------------------------------------------------------------------------------------------------------------------------------------------------------------------------------------------------------------------------------------------------------------------------------------------------------------------------------------------------------------------------------------------------------------------------------------------------------------------------------------------------------------------|
| 12 | intracellular signal transduction                    | 8.081E-20 | 59 | 92a-3p; 17-5p; 182-5p; 20a-5p; 155-5p; 96-5p; 19a-3p; hsa-let-7c-5p; 183-5p; 744-5p; 93-5p; 200c-3p; 19b-3p; 497-5p; 146a-5p; 106b-5p; 15b-5p; 130b-3p; 9-5p; 16-5p; 381-3p; 376c-3p; 124-3p; 186-5p; 31-5p; 625-3p; 451a; 125a-5p; 195-5p; 203a-3p; 128-3p; 218-5p; 135a-5p; 148a-3p; 30c-5p; 99a-5p; 144-3p; 132-3p; 130a-3p; 98-5p; 625-5p; 15a-5p; 194-5p; 26a-5p; 106a-5p; 139-5p; 1-3p; 138-5p; 27b-3p; 204-5p; 27a-3p; 494-3p; 21-5p; 20b-5p; 153-3p; 23b-3p; 145-5p; 125b-5p; 126-3p                                                                                                                                                                                                                         |
| 13 | regulation of cellular protein metabolic process     | 1.28E-19  | 75 | 92a-3p; 17-5p; 182-5p; 20a-5p; 155-5p; 96-5p; 18a-5p; 19a-3p; hsa-let-7c-5p; 17-3p; 183-5p; 142-3p; 744-5p; 93-5p; 200c-3p; 19b-3p; 582-5p; 497-5p; 146a-5p; 181c-5p; 106b-5p; 15b-5p; 130b-3p; 25-3p; 9-5p; 16-5p; 376c-3p; 124-3p; 30a-5p; 410-3p; 486-3p; 186-5p; 31-5p; 625-3p; 451a; 125a-5p; 195-5p; 203a-3p; 128-3p; hsa-let-7a-5p; 218-5p; 487b-3p; 148a-3p; 30c-5p; 144-3p; 101-5p; 132-3p; 484; 130a-3p; 149-5p; 625-5p; 495-3p; 15a-5p; 194-5p; 26a-5p; 106a-5p; 423-3p; 320c; 1-3p; 378a-3p; 590-5p; 7-5p; 138-5p; 27b-3p; 204-5p; 27a-3p; 494-3p; 369-3p; hsa-let-7b-5p; 21-5p; 30a-3p; 145-5p; 125b-5p; 126-3p; 92b-3p                                                                                 |
| 14 | negative regulation of programmed cell death         | 1.946E-19 | 57 | 17-5p; 182-5p; 155-5p; 96-5p; hsa-let-7c-5p; 183-5p; 92a-1-5p; 744-5p; 200c-3p; 497-5p; 146a-5p; 181c-5p; 15b-5p; 9-5p; 16-5p; 376c-3p; 124-3p; 30a-5p; 410-3p; 31-5p; 625-3p; 451a; 191-5p; 491-5p; 125a-5p; 195-5p; 203a-3p; 128-3p; 143-3p; hsa-let-7a-5p; 218-5p; 135a-5p; 543; 487b-3p; 148a-3p; 98-5p; 149-5p; 495-3p; 15a-5p; 26a-5p; 106a-5p; 139-5p; 425-3p; 1-3p; 33b-5p; 138-5p; 127-3p; 27b-3p; 204-5p; 27a-3p; 21-5p; 30a-3p; 153-3p; 23b-3p; 145-5p; 125b-5p; 126-3p                                                                                                                                                                                                                                   |
| 15 | biosynthetic process                                 | 2.531E-19 | 84 | 92a-3p; 17-5p; 182-5p; 20a-5p; 155-5p; 96-5p; 18a-5p; 19a-3p; hsa-let-7c-5p; 17-3p; hsa-let-7e-5p; 1260b; 92a-1-5p; 744-5p; 93-5p; 200c-3p; 19b-3p; 582-5p; 497-5p; 146a-5p; 181c-5p; 106b-5p; 15b-5p; 130b-3p; 25-3p; 9-5p; 425-5p; 16-5p; 192-5p; 30d-5p; 381-3p; 30a-5p; 410-3p; 486-3p; 186-5p; 9-3p; 31-5p; 625-3p; 451a; 191-5p; 125a-5p; 195-5p; 203a-3p; 128-3p; 143-3p; hsa-let-7a-5p; 218-5p; 135a-5p; 148a-3p; 30c-5p; 30b-5p; 99a-5p; 144-3p; 484; 130a-3p; 935; 98-5p; 149-5p; 495-3p; 15a-5p; 26a-5p; 106a-5p; 423-3p; 425-3p; 144-5p; 181d-5p; 378a-3p; 138-5p; 27b-3p; 204-5p; 27a-3p; 494-3p; 32-5p; hsa-let-7b-5p; 21-5p; 454-3p; 23b-3p; 331-5p; 145-5p; 125b-5p; 126-3p; 92b-3p; 770-5p; 1296-5p |
| 16 | organelle organization                               | 3.286E-19 | 60 | 92a-3p; 106b-3p; 17-5p; 182-5p; 20a-5p; 155-5p; 96-5p; 18a-5p; 19a-3p; hsa-let-7c-5p; hsa-let-7e-5p; 92a-1-5p; 744-5p; 93-5p; 200c-3p; 19b-3p; 181c-5p; 106b-5p; 15b-5p; 130b-3p; 25-3p; 9-5p; 16-5p; 192-5p; 30d-5p; 30a-5p; 186-5p; 125a-5p; 195-5p; 203a-3p; 128-3p; 218-5p; 423-5p; 543; 148a-3p; 30c-5p; 30b-5p; 484; 130a-3p; 149-5p; 495-3p; 15a-5p; 26a-5p; 106a-5p; 423-3p; 1-3p; 181d-5p; 138-5p; 187-3p; 27b-3p; 27a-3p; hsa-let-7b-5p; 21-5p; 20b-5p; 153-3p; 99b-3p; 23b-3p; 126-3p; 92b-3p; 1296-5p                                                                                                                                                                                                    |
| 17 | positive regulation of cellular biosynthetic process | 3.709E-19 | 78 | 92a-3p; 17-5p; 182-5p; 20a-5p; 155-5p; 18a-5p; 19a-3p; hsa-let-7c-5p; 17-3p; 92a-1-5p; 744-5p; 93-5p; 200c-3p; 19b-3p; 497-5p; 146a-5p; 106b-5p; 15b-5p; 130b-3p; 25-3p; 210-3p; 9-5p; 16-5p; 30d-5p; 381-3p; 124-3p; 30a-5p; 410-3p; 486-3p; 186-5p; 9-3p; 31-5p; 451a; 491-5p; 125a-5p; 195-5p; 203a-3p; 128-3p; hsa-let-7a-5p; 218-5p; 135a-5p; 423-5p; 543; 148a-3p; 656-3p; 30c-5p; 30b-5p; 99a-5p; 144-3p; 484; 130a-3p; 134-5p; 98-5p; 149-5p; 495-3p; 15a-5p; 26a-5p; 106a-5p; 139-5p; 323a-3p; 425-3p; 320c; 378a-3p; 138-5p; 187-3p; 27b-3p; 204-5p; 27a-3p; 494-3p; hsa-let-7b-5p; 21-5p; 20b-5p; 153-3p; 23b-3p; 145-5p; 125b-5p; 126-3p; 1296-5p                                                        |

|    |                                                   |           |    |                                                                                                                                                                                                                                                                                                                                                                                                                                                                                                                                                                                                                                                                                                                                                                                           |
|----|---------------------------------------------------|-----------|----|-------------------------------------------------------------------------------------------------------------------------------------------------------------------------------------------------------------------------------------------------------------------------------------------------------------------------------------------------------------------------------------------------------------------------------------------------------------------------------------------------------------------------------------------------------------------------------------------------------------------------------------------------------------------------------------------------------------------------------------------------------------------------------------------|
| 18 | posttranscriptional regulation of gene expression | 3.709E-19 | 59 | 92a-3p; 17-5p; 182-5p; 20a-5p; 155-5p; 96-5p; 18a-5p; 19a-3p; 17-3p; hsa-let-7e-5p; 744-5p; 93-5p; 19b-3p; 497-5p; 106b-5p; 15b-5p; 130b-3p; 25-3p; 16-5p; 30a-5p; 410-3p; 486-3p; 186-5p; 625-3p; 451a; 505-3p; 125a-5p; 195-5p; 203a-3p; 128-3p; hsa-let-7a-5p; 218-5p; 148a-3p; 30c-5p; 99a-5p; 93-3p; 484; 130a-3p; 149-5p; 15a-5p; 26a-5p; 106a-5p; 423-3p; 320c; 378a-3p; 590-5p; 138-5p; 27b-3p; 27a-3p; 494-3p; hsa-let-7b-5p; 21-5p; 20b-5p; 454-3p; 23b-3p; 145-5p; 125b-5p; 92b-3p; 1296-5p                                                                                                                                                                                                                                                                                    |
| 19 | negative regulation of apoptotic process          | 3.864E-19 | 55 | 17-5p; 182-5p; 155-5p; 96-5p; hsa-let-7c-5p; 183-5p; 92a-1-5p; 744-5p; 200c-3p; 497-5p; 146a-5p; 181c-5p; 15b-5p; 9-5p; 16-5p; 376c-3p; 124-3p; 30a-5p; 31-5p; 625-3p; 451a; 191-5p; 491-5p; 125a-5p; 195-5p; 203a-3p; 128-3p; 143-3p; hsa-let-7a-5p; 218-5p; 135a-5p; 543; 487b-3p; 148a-3p; 98-5p; 149-5p; 495-3p; 15a-5p; 26a-5p; 106a-5p; 139-5p; 1-3p; 33b-5p; 378a-3p; 138-5p; 127-3p; 27b-3p; 27a-3p; 21-5p; 30a-3p; 153-3p; 23b-3p; 145-5p; 125b-5p; 126-3p                                                                                                                                                                                                                                                                                                                       |
| 20 | nitrogen compound metabolic process               | 4.321E-19 | 84 | 92a-3p; 106b-3p; 17-5p; 20a-5p; 155-5p; 96-5p; 18a-5p; 1246; 19a-3p; hsa-let-7c-5p; 17-3p; 183-5p; hsa-let-7e-5p; 92a-1-5p; 744-5p; 93-5p; 200c-3p; 19b-3p; 582-5p; 497-5p; 146a-5p; 766-3p; 181c-5p; 106b-5p; 15b-5p; 130b-3p; 25-3p; 210-3p; 9-5p; 16-5p; 192-5p; 30d-5p; 381-3p; 30a-5p; 186-5p; 31-5p; 625-3p; 451a; 125a-5p; 195-5p; 203a-3p; 128-3p; 143-3p; hsa-let-7a-5p; 218-5p; 135a-5p; 423-5p; 543; 148a-3p; 30c-5p; 30b-5p; 99a-5p; 144-3p; 31-3p; 484; 130a-3p; 935; 98-5p; 149-5p; 625-5p; 15a-5p; 26a-5p; 106a-5p; 139-5p; 423-3p; 144-5p; 181d-5p; 378a-3p; 138-5p; 27b-3p; 27a-3p; 494-3p; 32-5p; hsa-let-7b-5p; 21-5p; 20b-5p; 454-3p; 23b-3p; 145-5p; 125b-5p; 126-3p; 92b-3p; 770-5p; 1296-5p                                                                        |
| 21 | cellular metabolic process                        | 9.242E-19 | 84 | 92a-3p; 106b-3p; 17-5p; 20a-5p; 155-5p; 96-5p; 18a-5p; 19a-3p; hsa-let-7c-5p; 17-3p; 183-5p; hsa-let-7e-5p; 1260b; 92a-1-5p; 744-5p; 93-5p; 200c-3p; 19b-3p; 582-5p; 497-5p; 766-3p; 181c-5p; 106b-5p; 15b-5p; 130b-3p; 25-3p; 210-3p; 9-5p; 425-5p; 30d-5p; 381-3p; 30a-5p; 186-5p; 9-3p; 31-5p; 625-3p; 451a; 505-3p; 191-5p; 491-5p; 125a-5p; 195-5p; 203a-3p; 128-3p; 143-3p; hsa-let-7a-5p; 218-5p; 148a-3p; 30c-5p; 30b-5p; 99a-5p; 144-3p; 31-3p; 484; 130a-3p; 935; 98-5p; 149-5p; 495-3p; 15a-5p; 26a-5p; 106a-5p; 423-3p; 425-3p; 320c; 1-3p; 181d-5p; 378a-3p; 138-5p; 27b-3p; 27a-3p; 494-3p; 32-5p; hsa-let-7b-5p; 21-5p; 20b-5p; 340-5p; 454-3p; 23b-3p; 145-5p; 125b-5p; 126-3p; 92b-3p; 1296-5p                                                                           |
| 22 | cellular macromolecule biosynthetic process       | 9.633E-19 | 93 | 92a-3p; 17-5p; 182-5p; 20a-5p; 155-5p; 96-5p; 18a-5p; 1246; 19a-3p; hsa-let-7c-5p; 17-3p; 183-5p; hsa-let-7e-5p; 92a-1-5p; 744-5p; 93-5p; 200c-3p; 19b-3p; 582-5p; 497-5p; 146a-5p; 766-3p; 181c-5p; 106b-5p; 15b-5p; 130b-3p; 25-3p; 9-5p; 425-5p; 16-5p; 192-5p; 30d-5p; 381-3p; 30a-5p; 410-3p; 486-3p; 186-5p; 9-3p; 31-5p; 625-3p; 505-3p; 191-5p; 125a-5p; 195-5p; 203a-3p; 128-3p; 143-3p; hsa-let-7a-5p; 218-5p; 135a-5p; 423-5p; 543; 148a-3p; 656-3p; 30c-5p; 30b-5p; 99a-5p; 144-3p; 484; 130a-3p; 134-5p; 935; 98-5p; 149-5p; 495-3p; 15a-5p; 26a-5p; 106a-5p; 423-3p; 425-3p; 320c; 144-5p; 181d-5p; 378a-3p; 138-5p; 27b-3p; 204-5p; 27a-3p; 494-3p; 376b-3p; 32-5p; hsa-let-7b-5p; 21-5p; 20b-5p; 454-3p; 23b-3p; 331-5p; 145-5p; 125b-5p; 126-3p; 92b-3p; 770-5p; 1296-5p |

|    |                                             |           |    |                                                                                                                                                                                                                                                                                                                                                                                                                                                                                                                                                                                                                                                                                                                                                             |
|----|---------------------------------------------|-----------|----|-------------------------------------------------------------------------------------------------------------------------------------------------------------------------------------------------------------------------------------------------------------------------------------------------------------------------------------------------------------------------------------------------------------------------------------------------------------------------------------------------------------------------------------------------------------------------------------------------------------------------------------------------------------------------------------------------------------------------------------------------------------|
| 23 | cell cycle                                  | 1.181E-18 | 75 | 92a-3p; 17-5p; 182-5p; 20a-5p; 155-5p; 96-5p; 18a-5p; 1246; 19a-3p; hsa-let-7c-5p; 183-5p; hsa-let-7e-5p; 92a-1-5p; 744-5p; 93-5p; 200c-3p; 19b-3p; 497-5p; 146a-5p; 181c-5p; 106b-5p; 15b-5p; 130b-3p; 25-3p; 9-5p; 16-5p; 192-5p; 376c-3p; 124-3p; 30a-5p; 186-5p; 625-3p; 451a; 191-5p; 125a-5p; 195-5p; 203a-3p; 128-3p; hsa-let-7a-5p; 218-5p; 487b-3p; 148a-3p; 21-3p; 30c-5p; 30b-5p; 99a-5p; 93-3p; 484; 130a-3p; 149-5p; 495-3p; 15a-5p; 26a-5p; 106a-5p; 323a-3p; 423-3p; 1-3p; 181d-5p; 378a-3p; 138-5p; 187-3p; 885-5p; 27b-3p; 27a-3p; 494-3p; hsa-let-7b-5p; 21-5p; 20b-5p; 340-5p; 454-3p; 145-5p; 125b-5p; 126-3p; 92b-3p; 1296-5p                                                                                                          |
| 24 | macromolecule metabolic process             | 1.306E-18 | 88 | 92a-3p; 106b-3p; 17-5p; 20a-5p; 155-5p; 96-5p; 18a-5p; 1246; 19a-3p; hsa-let-7c-5p; 17-3p; 183-5p; hsa-let-7e-5p; 92a-1-5p; 744-5p; 93-5p; 200c-3p; 19b-3p; 582-5p; 497-5p; 146a-5p; 766-3p; 181c-5p; 106b-5p; 15b-5p; 130b-3p; 25-3p; 210-3p; 9-5p; 16-5p; 192-5p; 30d-5p; 381-3p; 30a-5p; 186-5p; 31-5p; 625-3p; 451a; 505-3p; 125a-5p; 195-5p; 203a-3p; 128-3p; hsa-let-7a-5p; 218-5p; 135a-5p; 423-5p; 543; 148a-3p; 30c-5p; 30b-5p; 99a-5p; 144-3p; 31-3p; 484; 130a-3p; 935; 98-5p; 149-5p; 625-5p; 495-3p; 15a-5p; 26a-5p; 106a-5p; 139-5p; 423-3p; 425-3p; 320c; 144-5p; 181d-5p; 378a-3p; 590-5p; 138-5p; 27b-3p; 27a-3p; 494-3p; 32-5p; hsa-let-7b-5p; 21-5p; 20b-5p; 454-3p; 23b-3p; 145-5p; 125b-5p; 126-3p; 92b-3p; 770-5p; 1296-5p            |
| 25 | regulation of cellular process              | 1.487E-18 | 89 | 92a-3p; 17-5p; 182-5p; 20a-5p; 155-5p; 96-5p; 18a-5p; 1246; 19a-3p; hsa-let-7c-5p; 17-3p; 92a-1-5p; 744-5p; 93-5p; 200c-3p; 19b-3p; 582-5p; 497-5p; 146a-5p; 181c-5p; 106b-5p; 15b-5p; 130b-3p; 25-3p; 210-3p; 9-5p; 16-5p; 192-5p; 30d-5p; 381-3p; 376a-3p; 376c-3p; 124-3p; 30a-5p; 410-3p; 486-3p; 186-5p; 31-5p; 625-3p; 451a; 505-3p; 491-5p; 125a-5p; 195-5p; 203a-3p; 128-3p; hsa-let-7a-5p; 218-5p; 135a-5p; 148a-3p; 29b-1-5p; 129-1-3p; 656-3p; 30c-5p; 30b-5p; 99a-5p; 144-3p; 130a-3p; 98-5p; 149-5p; 495-3p; 15a-5p; 194-5p; 129-2-3p; 26a-5p; 106a-5p; 139-5p; 423-3p; 1-3p; 181d-5p; 378a-3p; 138-5p; 27b-3p; 204-5p; 27a-3p; 494-3p; 32-5p; 21-5p; 20b-5p; 30a-3p; 454-3p; 23b-3p; 211-5p; 145-5p; 125b-5p; 126-3p; 92b-3p; 770-5p; 1296-5p |
| 26 | programmed cell death                       | 2.297E-18 | 65 | 92a-3p; 17-5p; 182-5p; 20a-5p; 155-5p; 96-5p; 18a-5p; 19a-3p; hsa-let-7c-5p; 183-5p; 92a-1-5p; 744-5p; 93-5p; 200c-3p; 19b-3p; 582-5p; 497-5p; 146a-5p; 181c-5p; 106b-5p; 15b-5p; 130b-3p; 210-3p; 9-5p; 16-5p; 376c-3p; 124-3p; 30a-5p; 9-3p; 31-5p; 451a; 491-5p; 125a-5p; 195-5p; 203a-3p; 128-3p; 143-3p; 218-5p; 135a-5p; 148a-3p; 30c-5p; 484; 130a-3p; 935; 98-5p; 149-5p; 495-3p; 15a-5p; 26a-5p; 106a-5p; 139-5p; 1-3p; 378a-3p; 138-5p; 127-3p; 27b-3p; 27a-3p; 494-3p; 21-5p; 20b-5p; 30a-3p; 153-3p; 145-5p; 125b-5p; 126-3p                                                                                                                                                                                                                    |
| 27 | cellular response to growth factor stimulus | 2.34E-18  | 54 | 92a-3p; 182-5p; 155-5p; 96-5p; 18a-5p; 19a-3p; hsa-let-7c-5p; 183-5p; 744-5p; 200c-3p; 19b-3p; 497-5p; 146a-5p; 181c-5p; 15b-5p; 130b-3p; 25-3p; 9-5p; 376c-3p; 124-3p; 30a-5p; 186-5p; 451a; 125a-5p; 195-5p; 203a-3p; 128-3p; 143-3p; 218-5p; 135a-5p; 144-3p; 31-3p; 132-3p; 130a-3p; 495-3p; 15a-5p; 194-5p; 26a-5p; 296-5p; 106a-5p; 1-3p; 378a-3p; 590-5p; 138-5p; 27b-3p; 204-5p; 27a-3p; 32-5p; 21-5p; 30a-3p; 23b-3p; 145-5p; 125b-5p; 126-3p                                                                                                                                                                                                                                                                                                      |

|    |                                                           |           |    |                                                                                                                                                                                                                                                                                                                                                                                                                                                                                                                                                                                                                                                      |
|----|-----------------------------------------------------------|-----------|----|------------------------------------------------------------------------------------------------------------------------------------------------------------------------------------------------------------------------------------------------------------------------------------------------------------------------------------------------------------------------------------------------------------------------------------------------------------------------------------------------------------------------------------------------------------------------------------------------------------------------------------------------------|
| 28 | cellular response to organic substance                    | 2.34E-18  | 71 | 92a-3p; 17-5p; 182-5p; 155-5p; 96-5p; 18a-5p; 19a-3p; hsa-let-7c-5p; 183-5p; 142-3p; 744-5p; 93-5p; 200c-3p; 582-5p; 497-5p; 146a-5p; 106b-5p; 15b-5p; 130b-3p; 25-3p; 9-5p; 16-5p; 30d-5p; 381-3p; 376c-3p; 124-3p; 30a-5p; 9-3p; 31-5p; 625-3p; 451a; 125a-5p; 195-5p; 203a-3p; 369-5p; 128-3p; 143-3p; 218-5p; 135a-5p; 148a-3p; 30c-5p; 30b-5p; 144-3p; 31-3p; 132-3p; 130a-3p; 98-5p; 15a-5p; 194-5p; 26a-5p; 296-5p; 106a-5p; 320c; 1-3p; 33b-5p; 378a-3p; 7-5p; 138-5p; 27b-3p; 204-5p; 27a-3p; 494-3p; 32-5p; 21-5p; 30a-3p; 153-3p; 23b-3p; 145-5p; 125b-5p; 126-3p; 92b-3p                                                                 |
| 29 | regulation of programmed cell death                       | 2.416E-18 | 63 | 92a-3p; 17-5p; 182-5p; 20a-5p; 155-5p; 96-5p; 18a-5p; 19a-3p; hsa-let-7c-5p; 183-5p; 92a-1-5p; 744-5p; 200c-3p; 497-5p; 146a-5p; 15b-5p; 130b-3p; 210-3p; 9-5p; 16-5p; 376c-3p; 124-3p; 30a-5p; 9-3p; 625-3p; 451a; 191-5p; 125a-5p; 195-5p; 203a-3p; 128-3p; 218-5p; 135a-5p; 423-5p; 543; 148a-3p; 29b-1-5p; 30c-5p; 30b-5p; 130a-3p; 935; 98-5p; 495-3p; 15a-5p; 26a-5p; 106a-5p; 139-5p; 1-3p; 33b-5p; 378a-3p; 138-5p; 127-3p; 27b-3p; 204-5p; 27a-3p; 21-5p; 20b-5p; 30a-3p; 153-3p; 23b-3p; 145-5p; 125b-5p; 126-3p                                                                                                                           |
| 30 | regulation of apoptotic process                           | 2.538E-18 | 61 | 92a-3p; 17-5p; 182-5p; 20a-5p; 155-5p; 96-5p; 18a-5p; 19a-3p; hsa-let-7c-5p; 183-5p; 92a-1-5p; 744-5p; 93-5p; 200c-3p; 497-5p; 146a-5p; 106b-5p; 15b-5p; 130b-3p; 210-3p; 9-5p; 16-5p; 376c-3p; 124-3p; 30a-5p; 625-3p; 451a; 125a-5p; 195-5p; 203a-3p; 128-3p; 218-5p; 135a-5p; 423-5p; 543; 148a-3p; 29b-1-5p; 30c-5p; 30b-5p; 130a-3p; 935; 98-5p; 495-3p; 15a-5p; 26a-5p; 106a-5p; 1-3p; 33b-5p; 378a-3p; 138-5p; 127-3p; 27b-3p; 204-5p; 27a-3p; 21-5p; 20b-5p; 30a-3p; 153-3p; 145-5p; 125b-5p; 126-3p                                                                                                                                         |
| 31 | positive regulation of macromolecule biosynthetic process | 3.004E-18 | 77 | 92a-3p; 17-5p; 182-5p; 20a-5p; 155-5p; 18a-5p; 19a-3p; hsa-let-7c-5p; 17-3p; 92a-1-5p; 744-5p; 93-5p; 200c-3p; 19b-3p; 497-5p; 146a-5p; 106b-5p; 15b-5p; 130b-3p; 25-3p; 9-5p; 16-5p; 30d-5p; 381-3p; 124-3p; 30a-5p; 410-3p; 486-3p; 186-5p; 9-3p; 31-5p; 451a; 491-5p; 125a-5p; 195-5p; 203a-3p; 128-3p; hsa-let-7a-5p; 218-5p; 135a-5p; 423-5p; 543; 148a-3p; 656-3p; 30c-5p; 30b-5p; 99a-5p; 144-3p; 484; 130a-3p; 134-5p; 98-5p; 149-5p; 495-3p; 15a-5p; 26a-5p; 296-5p; 106a-5p; 139-5p; 425-3p; 320c; 378a-3p; 138-5p; 187-3p; 27b-3p; 204-5p; 27a-3p; 494-3p; hsa-let-7b-5p; 21-5p; 20b-5p; 153-3p; 23b-3p; 145-5p; 125b-5p; 126-3p; 1296-5p |
| 32 | regulation of organelle organization                      | 3.923E-18 | 54 | 92a-3p; 17-5p; 20a-5p; 155-5p; 18a-5p; 19a-3p; 142-3p; 744-5p; 93-5p; 200c-3p; 497-5p; 146a-5p; 106b-5p; 15b-5p; 130b-3p; 25-3p; 210-3p; 9-5p; 16-5p; 376c-3p; 30a-5p; 186-5p; 9-3p; 31-5p; 625-3p; 451a; 491-5p; 125a-5p; 195-5p; 203a-3p; 128-3p; 218-5p; 135a-5p; 148a-3p; 30c-5p; 484; 130a-3p; 149-5p; 15a-5p; 487a-3p; 26a-5p; 323a-3p; 1-3p; 138-5p; 127-3p; 27a-3p; 494-3p; hsa-let-7b-5p; 21-5p; 153-3p; 99b-3p; 145-5p; 126-3p; 92b-3p                                                                                                                                                                                                     |
| 33 | apoptotic process                                         | 7.341E-18 | 64 | 92a-3p; 17-5p; 182-5p; 20a-5p; 155-5p; 96-5p; 18a-5p; 19a-3p; hsa-let-7c-5p; 183-5p; 92a-1-5p; 744-5p; 93-5p; 200c-3p; 19b-3p; 582-5p; 497-5p; 146a-5p; 181c-5p; 106b-5p; 15b-5p; 130b-3p; 210-3p; 9-5p; 16-5p; 376c-3p; 124-3p; 30a-5p; 9-3p; 31-5p; 451a; 125a-5p; 195-5p; 203a-3p; 128-3p; 143-3p; 218-5p; 135a-5p; 148a-3p; 30c-5p; 484; 130a-3p; 935; 98-5p; 149-5p; 495-3p; 15a-5p; 26a-5p; 106a-5p; 139-5p; 1-3p; 378a-3p; 138-5p; 127-3p; 27b-3p; 27a-3p; 21-5p; 20b-5p; 30a-3p; 153-3p; 23b-3p; 145-5p; 125b-5p; 126-3p                                                                                                                     |

|    |                                          |           |    |                                                                                                                                                                                                                                                                                                                                                                                                                                                                                                                     |
|----|------------------------------------------|-----------|----|---------------------------------------------------------------------------------------------------------------------------------------------------------------------------------------------------------------------------------------------------------------------------------------------------------------------------------------------------------------------------------------------------------------------------------------------------------------------------------------------------------------------|
| 34 | cell death                               | 4.056E-17 | 62 | 92a-3p; 17-5p; 182-5p; 20a-5p; 155-5p; 96-5p; 18a-5p; 19a-3p; hsa-let-7c-5p; 183-5p; 92a-1-5p; 744-5p; 93-5p; 200c-3p; 19b-3p; 582-5p; 497-5p; 146a-5p; 181c-5p; 106b-5p; 15b-5p; 130b-3p; 210-3p; 9-5p; 16-5p; 376c-3p; 124-3p; 30a-5p; 9-3p; 31-5p; 451a; 491-5p; 125a-5p; 195-5p; 203a-3p; 128-3p; 143-3p; 218-5p; 135a-5p; 148a-3p; 30c-5p; 130a-3p; 935; 98-5p; 495-3p; 15a-5p; 26a-5p; 106a-5p; 139-5p; 1-3p; 378a-3p; 138-5p; 127-3p; 27b-3p; 27a-3p; 21-5p; 20b-5p; 30a-3p; 153-3p; 145-5p; 125b-5p; 126-3p |
| 35 | negative regulation of cell cycle        | 4.978E-17 | 58 | 92a-3p; 17-5p; 182-5p; 20a-5p; 155-5p; 96-5p; 18a-5p; 1246; 19a-3p; hsa-let-7c-5p; 183-5p; 142-3p; 92a-1-5p; 744-5p; 93-5p; 200c-3p; 19b-3p; 146a-5p; 106b-5p; 130b-3p; 25-3p; 16-5p; 376c-3p; 124-3p; 30a-5p; 186-5p; 451a; 191-5p; 125a-5p; 203a-3p; 128-3p; hsa-let-7a-5p; 135a-5p; 487b-3p; 148a-3p; 30c-5p; 30b-5p; 144-3p; 130a-3p; 98-5p; 149-5p; 495-3p; 15a-5p; 26a-5p; 106a-5p; 423-3p; 138-5p; 885-5p; 27b-3p; 27a-3p; 494-3p; hsa-let-7b-5p; 21-5p; 20b-5p; 23b-3p; 145-5p; 125b-5p; 126-3p             |
| 36 | cellular macromolecule catabolic process | 6.508E-17 | 52 | 92a-3p; 17-5p; 182-5p; 20a-5p; 155-5p; 18a-5p; hsa-let-7c-5p; 17-3p; 183-5p; hsa-let-7e-5p; 744-5p; 93-5p; 582-5p; 497-5p; 106b-5p; 15b-5p; 130b-3p; 25-3p; 16-5p; 30a-5p; 410-3p; 186-5p; 625-3p; 505-3p; 125a-5p; 195-5p; 203a-3p; 128-3p; hsa-let-7a-5p; 218-5p; 543; 148a-3p; 30c-5p; 99a-5p; 484; 935; 149-5p; 15a-5p; 376a-5p; 26a-5p; 139-5p; 423-3p; 181d-5p; 378a-3p; 27b-3p; 27a-3p; hsa-let-7b-5p; 21-5p; 20b-5p; 125b-5p; 92b-3p; 1296-5p                                                               |

\*p-value after the Benjamini-Hochberg adjustment
